# Supplementary material for: Palladium-catalyzed microwave-assisted direct arylation of imidazo[2,1-b]thiazoles with aryl bromides: synthesis and mechanistic study
Source: Royal Society of Chemistry journal article supplement (doi:10.1039/c4ob00600c), 2014-06-03
Supplement: c4ob00600c1.pdf [file c4ob00600c1.pdf]

# Palladium-catalyzed microwave-assisted direct arylation of imidazo[2,1-b]thiazoles with aryl bromides: synthesis and mechanistic study

Yi-Shuo Zhu, Benyi Shi, Ran Fang, Xiaoxuan Wang, Huanwang Jing\*

*State Key Laboratory of Applied Organic Chemistry, College of Chemistry and Chemical Engineering,  
Lanzhou University, Lanzhou 730000, China*

*hw-jing@163.com*

## Supporting Information

### Table of Contents

---

|                                                         |     |
|---------------------------------------------------------|-----|
| 1. Characterization data for compounds <b>3aa-dd</b>    | S2  |
| 2. Crystal data and structure refinement for <b>3aa</b> | S9  |
| 3. Computational details                                | S11 |
| 4. <sup>1</sup> H and <sup>13</sup> C NMR spectra       | S36 |
| 5. References                                           | S66 |

---

### 1. Characterization data

### **5-(4-Nitrophenyl)-6-phenylimidazo[2,1-b]thiazole (3aa)**

Orange solid (58 mg, 72% yield), mp 154-156 °C. IR (KBr) 3065, 1597, 1514, 1460, 1442, 1344, 852, 732, 696 cm<sup>-1</sup>. <sup>1</sup>H NMR (300 MHz, CDCl<sub>3</sub>) δ 8.27 (d, *J* = 8.7 Hz, 2H), 7.60 (d, *J* = 8.7 Hz, 2H), 7.54-7.53 (m, 2H), 7.51 (d, *J* = 4.5 Hz, 1H), 7.36-7.28 (m, 3H), 6.94 (d, *J* = 4.5 Hz, 1H). <sup>13</sup>C NMR (75 MHz, CDCl<sub>3</sub>) δ 150.6, 146.8, 145.7, 137.0, 133.6, 129.0, 128.6, 128.0, 124.5, 120.7, 117.2, 113.7. HRMS (ESI) calcd. for C<sub>17</sub>H<sub>11</sub>N<sub>3</sub>O<sub>2</sub>S [MH<sup>+</sup>]: 322.0645; Found: 322.0658.

### **5-(3-Nitrophenyl)-6-phenylimidazo[2,1-b]thiazole (3ab)**

Yellow solid (44 mg, 55% yield), mp 200-202 °C. IR (KBr) 3080, 1603, 1529, 1462, 1442, 1348, 874, 811, 754, 736, 700 cm<sup>-1</sup>. <sup>1</sup>H NMR (300 MHz, CDCl<sub>3</sub>) δ 8.35 (t, *J* = 1.9 Hz, 1H), 8.24 (d, *J* = 8.2 Hz, 1H), 7.74 (d, *J* = 7.9 Hz, 1H), 7.61 (d, *J* = 8.1 Hz, 1H), 7.58-7.53 (m, 2H), 7.45 (d, *J* = 4.5 Hz, 1H), 7.35-7.27 (m, 3H), 6.93 (d, *J* = 4.5 Hz, 1H). <sup>13</sup>C NMR (75 MHz, CDCl<sub>3</sub>) δ 150.1, 148.8, 145.1, 135.1, 133.7, 132.3, 130.2, 128.5, 127.7, 125.2, 123.1, 122.8, 120.2, 117.0, 113.4. HRMS (ESI) calcd. for C<sub>17</sub>H<sub>11</sub>N<sub>3</sub>O<sub>2</sub>S [MH<sup>+</sup>]: 322.0645; Found: 322.0640.

### **5-(2-Nitrophenyl)-6-phenylimidazo[2,1-b]thiazole (3ac)**

Yellow solid (18 mg, 22% yield), mp 62-64 °C. IR (KBr) 3062, 1603, 1527, 1462, 1442, 1346, 853, 735, 700 cm<sup>-1</sup>. <sup>1</sup>H NMR (300 MHz, CDCl<sub>3</sub>) δ 8.22-8.17 (m, 1H), 7.69-7.64 (m, 2H), 7.47 (ddd, *J* = 9.6, 7.3, 2.7 Hz, 4H), 7.26-7.23 (m, 2H), 7.06 (d, *J* = 4.5 Hz, 1H), 6.84 (d, *J* = 4.5 Hz, 1H). <sup>13</sup>C NMR (100 MHz, CDCl<sub>3</sub>) δ 149.9, 149.1, 145.1, 134.3, 133.8, 133.6, 130.2, 128.4, 127.4, 127.2, 125.3, 125.2, 117.5, 117.4, 112.8. HRMS (ESI) calcd. for C<sub>17</sub>H<sub>11</sub>N<sub>3</sub>O<sub>2</sub>S [MH<sup>+</sup>]: 322.0645; Found: 322.0656.

### **4-(6-Phenylimidazo[2,1-b]thiazol-5-yl)benzotrile (3ad)**

White solid (49 mg, 65% yield), mp 180-182 °C. IR (KBr) 3065, 2228, 1605, 1536, 1461, 1443, 1371, 850, 734, 700 cm<sup>-1</sup>. <sup>1</sup>H NMR (300 MHz, CDCl<sub>3</sub>) δ 7.72 (d, *J* = 8.6 Hz, 2H), 7.58-7.52 (m, 4H), 7.46 (d, *J* = 4.5 Hz, 1H), 7.33-7.29 (m, 3H), 6.92 (d, *J* = 4.5 Hz, 1H). <sup>13</sup>C NMR (75 MHz, CDCl<sub>3</sub>) δ 150.3, 145.3, 135.1, 133.7, 132.9, 129.0, 128.5, 127.9, 120.9, 118.4, 117.1, 113.4, 111.3. HRMS (ESI) calcd. for C<sub>18</sub>H<sub>11</sub>N<sub>3</sub>S [MH<sup>+</sup>]: 302.0746; Found: 302.0749.

### **6-Phenyl-5-(4-(trifluoromethyl)phenyl)imidazo[2,1-b]thiazole (3ae)**

White solid (47 mg, 55% yield), mp 38-40 °C. IR (KBr) 3065, 1613, 1542, 1462, 1443, 1325, 1165, 1123, 852, 734, 702 cm<sup>-1</sup>. <sup>1</sup>H NMR (300 MHz, CDCl<sub>3</sub>) δ 7.70 (d, *J* = 8.2 Hz, 2H), 7.57 (d, *J* = 8.0 Hz, 4H), 7.43 (d, *J* = 4.5 Hz, 1H), 7.35–7.27 (m, 3H), 6.89 (d, *J* = 4.5 Hz, 1H). <sup>13</sup>C NMR (75 MHz, CDCl<sub>3</sub>) δ 149.8, 144.6, 134.1, 133.9, 129.0, 128.5, 127.8, 127.6, 126.2, 125.7, 122.1, 121.3, 117.2, 113.1. HRMS (ESI) calcd. for C<sub>18</sub>H<sub>11</sub>F<sub>3</sub>N<sub>2</sub>S [MH<sup>+</sup>]: 345.0668; Found: 345.0680.

#### **1-(4-(6-Phenylimidazo[2,1-b]thiazol-5-yl)phenyl)ethanone (3af)**

Yellow solid (40 mg, 50% yield), mp 64-66 °C. IR (KBr) 3061, 2981, 1736, 1683, 1604, 1537, 1477, 1443, 1371, 1266, 1246, 852, 720, 700 cm<sup>-1</sup>. <sup>1</sup>H NMR (300 MHz, CDCl<sub>3</sub>) δ 8.05–7.99 (m, 2H), 7.57 (ddd, *J* = 10.3, 6.5, 2.0 Hz, 4H), 7.47 (d, *J* = 4.5 Hz, 1H), 7.32–7.26 (m, 3H), 6.89 (d, *J* = 4.5 Hz, 1H), 2.65 (s, 3H). <sup>13</sup>C NMR (75 MHz, CDCl<sub>3</sub>) δ 197.3, 149.9, 144.8, 136.2, 135.2, 134.0, 129.2, 128.7, 128.4, 127.9, 127.6, 121.7, 117.4, 113.1, 26.7. HRMS (ESI) calcd. for C<sub>19</sub>H<sub>14</sub>N<sub>2</sub>SO [MH<sup>+</sup>]: 319.0900; Found: 319.0908.

#### **Methyl 4-(6-phenylimidazo[2,1-b]thiazol-5-yl)benzoate(3ag)**

Yellow solid (25 mg, 30% yield), mp 68-69 °C. IR (KBr) 3060, 2923, 1720, 1608, 1545, 1460, 1438, 1374, 1277, 1184, 1112, 859, 733, 701 cm<sup>-1</sup>. <sup>1</sup>H NMR (300 MHz, CDCl<sub>3</sub>) δ 8.10 (d, *J* = 8.3 Hz, 2H), 7.57 (dd, *J* = 7.7, 1.8 Hz, 2H), 7.52 (d, *J* = 8.3 Hz, 2H), 7.44 (d, *J* = 4.5 Hz, 1H), 7.33–7.24 (m, 3H), 6.87 (d, *J* = 4.5 Hz, 1H), 3.95 (s, 3H). <sup>13</sup>C NMR (75 MHz, CDCl<sub>3</sub>) δ 166.5, 149.8, 144.6, 135.0, 134.0, 130.4, 129.5, 128.6, 128.4, 127.8, 127.5, 121.8, 117.4, 113.0, 52.3. HRMS (ESI) calcd. for C<sub>19</sub>H<sub>14</sub>N<sub>2</sub>O<sub>2</sub>S [MH<sup>+</sup>]: 335.0849; Found: 335.0847.

#### **6-Phenyl-5-(p-tolyl)imidazo[2,1-b]thiazole (3ah)**

Yellow solid (15 mg, 20% yield), mp 139-140 °C. IR (KBr) 3060, 1603, 1540, 1511, 1464, 1442, 1370, 856, 734, 699 cm<sup>-1</sup>. <sup>1</sup>H NMR (300 MHz, CDCl<sub>3</sub>) δ 7.64–7.59 (m, 2H), 7.44–7.40 (m, 1H), 7.31 (dd, *J* = 8.1, 3.4 Hz, 3H), 7.27–7.22 (m, 4H), 6.75 (d, *J* = 4.5 Hz, 1H), 2.41 (s, 3H). <sup>13</sup>C NMR (75 MHz, CDCl<sub>3</sub>) δ 148.6, 143.0, 138.2, 134.5, 129.9, 129.5, 128.9, 128.2, 127.4, 126.9, 122.8, 117.4, 112.3, 21.3. HRMS (ESI) calcd. for C<sub>18</sub>H<sub>14</sub>N<sub>2</sub>S [MH<sup>+</sup>]: 291.0950; Found: 291.0959.

#### **5-(3,5-Bis(trifluoromethyl)phenyl)-6-phenylimidazo[2,1-b]thiazole (3ai)**

White solid (46 mg, 44% yield), mp 146-147 °C. IR (KBr) 3064, 1603, 1540, 1463, 1444, 1344, 1280, 1180, 1133, 847, 799, 735, 706 cm<sup>-1</sup>. <sup>1</sup>H NMR (300 MHz, CDCl<sub>3</sub>) δ 7.88 (s, 3H), 7.53 (d, *J* = 5.3 Hz, 2H), 7.42 (d, *J* = 4.3 Hz, 1H), 7.32-7.26 (m, 3H), 6.94 (d, *J* = 4.3 Hz, 1H). <sup>13</sup>C NMR (75 MHz, CDCl<sub>3</sub>) δ 150.5, 145.6, 133.3, 132.8, 132.4, 128.6, 128.1, 127.7, 124.7, 121.4, 119.6, 116.8, 113.8. HRMS (ESI) calcd. for C<sub>19</sub>H<sub>10</sub>F<sub>6</sub>N<sub>2</sub>S [MH<sup>+</sup>]: 413.0542; Found: 413.0542.

### **5-(4-Nitro-3-(trifluoromethyl)phenyl)-6-phenylimidazo[2,1-b]thiazole (3aj)**

Orange solid (53 mg, 54% yield), mp 176-177 °C. IR (KBr) 3064, 1607, 1537, 1460, 1444, 1355, 1182, 1151, 867, 853, 735, 704 cm<sup>-1</sup>. <sup>1</sup>H NMR (300 MHz, CDCl<sub>3</sub>) δ 7.94 (d, *J* = 8.4 Hz, 1H), 7.88 (s, 1H), 7.73 (dd, *J* = 8.4, 1.6 Hz, 1H), 7.56-7.48 (m, 3H), 7.39-7.31 (m, 3H), 6.99 (d, *J* = 4.5 Hz, 1H). <sup>13</sup>C NMR (75 MHz, CDCl<sub>3</sub>) δ 151.2, 146.7, 146.3, 135.7, 133.2, 132.2, 128.7, 128.4, 128.0, 127.2, 126.3, 125.1, 124.7, 119.8, 119.4, 116.9, 114.1. HRMS (ESI) calcd. for C<sub>18</sub>H<sub>10</sub>F<sub>3</sub>N<sub>3</sub>O<sub>2</sub>S [MH<sup>+</sup>]: 390.0519; Found: 390.0519.

### **3-(4-Nitrophenyl)-2-phenylbenzo[d]imidazo[2,1-b]thiazole (3ba)**

Yellow solid (91 mg, 98% yield), mp 223-224 °C. IR (KBr) 3062, 1596, 1515, 1482, 1440, 1348, 853, 742, 699 cm<sup>-1</sup>. <sup>1</sup>H NMR (300 MHz, CDCl<sub>3</sub>) δ 8.40 (d, *J* = 8.4 Hz, 2H), 7.80-7.68 (m, 3H), 7.46 (d, *J* = 5.5 Hz, 2H), 7.35-7.17 (m, 5H), 6.96 (d, *J* = 8.0 Hz, 1H). <sup>13</sup>C NMR (75 MHz, CDCl<sub>3</sub>) δ 148.7, 148.1, 145.1, 137.1, 133.3, 132.7, 132.1, 130.5, 128.5, 127.7, 127.5, 126.0, 124.9, 124.6, 124.4, 121.9, 113.2. HRMS (ESI) calcd. for C<sub>21</sub>H<sub>13</sub>N<sub>3</sub>O<sub>2</sub>S [MH<sup>+</sup>]: 372.0801; Found: 372.0805.

### **3-(3-Nitrophenyl)-2-phenylbenzo[d]imidazo[2,1-b]thiazole (3bb)**

Yellow solid (64 mg, 69% yield), mp 249-250 °C. IR (KBr) 3051, 1599, 1523, 1483, 1442, 1345, 870, 815, 768, 738, 692 cm<sup>-1</sup>. <sup>1</sup>H NMR (300 MHz, CDCl<sub>3</sub>) δ 8.43 (d, *J* = 10.7 Hz, 2H), 7.90 (d, *J* = 7.4 Hz, 1H), 7.78-7.70 (m, 2H), 7.48 (d, *J* = 5.8 Hz, 2H), 7.34-7.13 (m, 5H), 6.82 (d, *J* = 7.8 Hz, 1H). <sup>13</sup>C NMR (75 MHz, CDCl<sub>3</sub>) δ 148.7, 148.2, 144.8, 137.4, 133.3, 132.6, 132.2, 130.5, 130.4, 128.5, 127.6, 127.2, 126.0, 124.8, 124.6, 124.2, 121.4, 112.9. HRMS (ESI) calcd. for C<sub>21</sub>H<sub>13</sub>N<sub>3</sub>O<sub>2</sub>S [MH<sup>+</sup>]: 372.0801; Found: 372.0806.

### **4-(2-Phenylbenzo[d]imidazo[2,1-b]thiazol-3-yl)benzotrile (3bc)**

White solid (69 mg, 79% yield), mp 193-195 °C. IR (KBr) 3066, 2232, 1599, 1550, 1488, 1441, 1368, 842, 733, 700  $\text{cm}^{-1}$ .  $^1\text{H}$  NMR (300 MHz,  $\text{CDCl}_3$ )  $\delta$  7.83 (d,  $J = 7.8$  Hz, 2H), 7.69-7.66 (m, 3H), 7.45 (d,  $J = 5.6$  Hz, 2H), 7.33-7.16 (m, 5H), 6.91 (d,  $J = 8.0$  Hz, 1H).  $^{13}\text{C}$  NMR (75 MHz,  $\text{CDCl}_3$ )  $\delta$  148.3, 144.6, 135.0, 133.3, 132.8, 132.6, 131.8, 130.4, 128.4, 127.5, 127.3, 125.8, 124.8, 124.4, 122.1, 118.2, 113.0, 112.9. HRMS (ESI) calcd. for  $\text{C}_{22}\text{H}_{13}\text{N}_3\text{S}$  [ $\text{MH}^+$ ]: 352.0903; Found: 352.0907.

### **2-Phenyl-3-(4-(trifluoromethyl)phenyl)benzo[d]imidazo[2,1-b]thiazole (3bd)**

White solid (76 mg, 77% yield), mp 219-222 °C. IR (KBr) 3063, 1600, 1512, 1490, 1442, 1369, 1333, 1159, 1120, 849, 743, 700  $\text{cm}^{-1}$ .  $^1\text{H}$  NMR (300 MHz,  $\text{CDCl}_3$ )  $\delta$  7.82 (d,  $J = 8.2$  Hz, 2H), 7.71-7.68 (m, 3H), 7.49 (dd,  $J = 7.9, 1.6$  Hz, 2H), 7.31-7.15 (m, 5H), 6.87 (d,  $J = 8.3$  Hz, 1H).  $^{13}\text{C}$  NMR (75 MHz,  $\text{CDCl}_3$ )  $\delta$  148.0, 144.3, 134.1, 133.6, 132.8, 131.6, 131.1, 130.5, 128.4, 127.4, 127.2, 126.2, 125.9, 124.7, 124.4, 122.6, 122.1, 113.2. HRMS (ESI) calcd. for  $\text{C}_{22}\text{H}_{13}\text{F}_3\text{N}_2\text{S}$  [ $\text{MH}^+$ ]: 395.0824; Found: 395.0820.

### **3-(3,5-Bis(trifluoromethyl)phenyl)-2-phenylbenzo[d]imidazo[2,1-b]thiazole (3be)**

White solid (99 mg, 85% yield), mp 189 °C. IR (KBr) 3051, 1601, 1553, 1478, 1444, 1344, 1276, 1173, 1119, 846, 804, 745, 697  $\text{cm}^{-1}$ .  $^1\text{H}$  NMR (300 MHz,  $\text{CDCl}_3$ )  $\delta$  8.05 (d,  $J = 5.5$  Hz, 3H), 7.72 (d,  $J = 7.8$  Hz, 1H), 7.46 (dd,  $J = 7.7, 1.9$  Hz, 2H), 7.35-7.18 (m, 5H), 6.83 (d,  $J = 7.7$  Hz, 1H).  $^{13}\text{C}$  NMR (75 MHz,  $\text{CDCl}_3$ )  $\delta$  148.7, 145.2, 133.3, 133.0, 132.7, 132.0, 131.4, 130.6, 128.5, 127.8, 127.3, 126.0, 124.9, 124.7, 122.8, 121.1, 120.8, 112.8. HRMS (ESI) calcd. for  $\text{C}_{23}\text{H}_{12}\text{F}_6\text{N}_2\text{S}$  [ $\text{MH}^+$ ]: 463.0698; Found: 463.0691.

### **3-(4-Nitro-3-(trifluoromethyl)phenyl)-2-phenylbenzo[d]imidazo[2,1-b]thiazole (3bf)**

Orange solid (66 mg, 61% yield), mp 247-248 °C. IR (KBr) 3030, 1592, 1534, 1486, 1443, 1353, 1180, 1140, 860, 808, 742, 698  $\text{cm}^{-1}$ .  $^1\text{H}$  NMR (300 MHz,  $\text{CDCl}_3$ )  $\delta$  8.06 (d,  $J = 8.3$  Hz, 1H), 8.03 (d,  $J = 1.5$  Hz, 1H), 7.91 (dd,  $J = 8.3, 1.8$  Hz, 1H), 7.76 (dd,  $J = 7.9, 1.0$  Hz, 1H), 7.47-7.41 (m, 2H), 7.39-7.27 (m, 5H), 6.97 (d,  $J = 8.0$  Hz, 1H).  $^{13}\text{C}$  NMR (75 MHz,  $\text{CDCl}_3$ )  $\delta$  149.3, 147.6, 145.9, 135.4, 132.8, 132.4, 130.50, 130.3, 128.6, 128.0, 127.6, 126.1, 125.1, 124.9, 124.4, 123.4, 120.4, 119.8, 112.9. HRMS (ESI) calcd. for  $\text{C}_{22}\text{H}_{12}\text{F}_3\text{N}_3\text{O}_2\text{S}$  [ $\text{MH}^+$ ]: 440.0675; Found: 440.0666.

### **3-(4-Nitrophenyl)-2-phenyl-5,6,7,8-tetrahydrobenzo[d]imidazo[2,1-b]thiazole (3ca)**

Golden yellow solid (85 mg, 91% yield), mp 210-212 °C. IR (KBr) 3065, 2935, 1599, 1520, 1477, 1443, 1346, 854, 733, 706 cm<sup>-1</sup>. <sup>1</sup>H NMR (300 MHz, CDCl<sub>3</sub>) δ 8.29 (d, *J* = 8.6 Hz, 2H), 7.61 (d, *J* = 8.6 Hz, 2H), 7.40 (dd, *J* = 7.7, 2.0 Hz, 2H), 7.25–7.18 (m, 3H), 2.70 (t, *J* = 5.1 Hz, 2H), 2.10 (t, *J* = 6.1 Hz, 2H), 1.90–1.69 (m, 4H). <sup>13</sup>C NMR (75 MHz, CDCl<sub>3</sub>) δ 148.8, 147.7, 143.7, 137.7, 133.9, 132.4, 128.3, 127.3, 127.2, 126.8, 123.6, 122.7, 120.6, 24.7, 22.5, 21.9. HRMS (ESI) calcd. for C<sub>21</sub>H<sub>17</sub>N<sub>3</sub>O<sub>2</sub>S [MH<sup>+</sup>]: 376.1114; Found: 376.1109.

### **3-(3-Nitrophenyl)-2-phenyl-5,6,7,8-tetrahydrobenzo[d]imidazo[2,1-b]thiazole (3cb)**

Yellow solid (50 mg, 53% yield), mp 269-270 °C. IR (KBr) 3041, 2925, 1597, 1520, 1465, 1437, 1341, 867, 816, 753, 740, 694 cm<sup>-1</sup>. <sup>1</sup>H NMR (300 MHz, CDCl<sub>3</sub>) δ 8.36–8.29 (m, 2H), 7.77 (dt, *J* = 7.6, 1.2 Hz, 1H), 7.61 (t, *J* = 8.1 Hz, 1H), 7.42 (dd, *J* = 7.9, 1.8 Hz, 2H), 7.25–7.18 (m, 3H), 2.70 (t, *J* = 5.8 Hz, 2H), 2.05 (t, *J* = 5.1 Hz, 2H), 1.89–1.67 (m, 4H). <sup>13</sup>C NMR (75 MHz, CDCl<sub>3</sub>) δ 148.4, 148.0, 143.6, 137.8, 133.9, 132.7, 129.5, 128.3, 127.2, 126.7, 126.3, 123.7, 122.6, 120.2, 24.7, 24.6, 22.4, 21.9. HRMS (ESI) calcd. for C<sub>21</sub>H<sub>17</sub>N<sub>3</sub>O<sub>2</sub>S [MH<sup>+</sup>]: 376.1114; Found: 376.1130.

### **4-(2-Phenyl-5,6,7,8-tetrahydrobenzo[d]imidazo[2,1-b]thiazol-3-yl)benzotrile (3cc)**

White solid (59 mg, 66% yield), mp 214-215 °C. IR (KBr) 3064, 2942, 2226, 1605, 1538, 1481, 1441, 1379, 840, 736, 703 cm<sup>-1</sup>. <sup>1</sup>H NMR (300 MHz, CDCl<sub>3</sub>) δ 7.72 (d, *J* = 8.2 Hz, 2H), 7.55 (d, *J* = 8.2 Hz, 2H), 7.39 (dd, *J* = 7.7, 1.5 Hz, 2H), 7.26–7.14 (m, 3H), 2.68 (d, *J* = 6.0 Hz, 2H), 2.08 (d, *J* = 6.0 Hz, 2H), 1.90–1.67 (m, 4H). <sup>13</sup>C NMR (75 MHz, CDCl<sub>3</sub>) δ 148.5, 143.4, 135.7, 133.9, 132.3, 132.1, 128.2, 127.2, 127.0, 126.7, 122.5, 120.9, 118.4, 112.4, 24.6, 24.5, 22.4, 21.9. HRMS (ESI) calcd. for C<sub>22</sub>H<sub>17</sub>N<sub>3</sub>S [MH<sup>+</sup>]: 356.1216; Found: 356.1209.

### **2-Phenyl-3-(4-(trifluoromethyl)phenyl)-5,6,7,8-tetrahydrobenzo[d]imidazo[2,1-b]thiazole (3cd)**

White solid (65 mg, 65% yield), mp 187-189 °C. IR (KBr) 3070, 2943, 1603, 1547, 1485, 1442, 1380, 1323, 1169, 1129, 859, 736, 703 cm<sup>-1</sup>. <sup>1</sup>H NMR (300 MHz, CDCl<sub>3</sub>) δ 7.68 (d, *J* = 8.1 Hz, 2H), 7.56 (d, *J* = 8.1 Hz, 2H), 7.46–7.39 (m, 2H), 7.24–7.12 (m, 3H), 2.67 (dd, *J* = 7.0, 5.1 Hz, 2H), 2.04 (dd, *J* = 7.1, 5.0 Hz, 2H), 1.88–1.65 (m, 4H). <sup>13</sup>C NMR (75 MHz, CDCl<sub>3</sub>) δ 148.1, 143.0, 134.7, 134.2,

132.0, 130.9, 130.5, 128.2, 127.0, 126.8, 125.7, 125.3, 122.1, 121.4, 24.6, 24.3, 22.5, 21.9. HRMS (ESI) calcd. for C<sub>22</sub>H<sub>17</sub>F<sub>3</sub>N<sub>2</sub>S [MH<sup>+</sup>]: 399.1137; Found: 399.1152.

**3-(3,5-Bis(trifluoromethyl)phenyl)-2-phenyl-5,6,7,8-tetrahydrobenzo[d]imidazo[2,1-b]thiazole (3ce)**

White solid (84 mg, 72% yield), mp 239 °C. IR (KBr) 3060, 2921, 1601, 1548, 1466, 1443, 1350, 1280, 1178, 1133, 845, 800, 729, 697 cm<sup>-1</sup>. <sup>1</sup>H NMR (300 MHz, CDCl<sub>3</sub>) δ 7.96 (s, 1H), 7.90 (s, 2H), 7.42–7.36 (m, 2H), 7.28–7.19 (m, 3H), 2.71 (t, *J* = 6.0 Hz, 2H), 2.03 (t, *J* = 5.9 Hz, 2H), 1.92–1.69 (m, 4H). <sup>13</sup>C NMR (75 MHz, CDCl<sub>3</sub>) δ 148.8, 143.9, 133.6, 133.2, 132.0, 131.6, 128.4, 127.1, 126.5, 124.8, 123.0, 122.3, 121.2, 119.6, 24.7, 24.6, 22.4, 22.0. HRMS (ESI) calcd. for C<sub>23</sub>H<sub>16</sub>F<sub>6</sub>N<sub>2</sub>S [MH<sup>+</sup>]: 467.1011; Found: 467.1000.

**3-(4-Nitro-3-(trifluoromethyl)phenyl)-2-phenyl-5,6,7,8-tetrahydrobenzo[d]imidazo[2,1-b]thiazole (3cf)**

Orange solid (68 mg, 62% yield), mp 286–287 °C. IR (KBr) 3036, 2945, 1593, 1533, 1481, 1442, 1391, 1356, 1183, 1136, 858, 734, 697 cm<sup>-1</sup>. <sup>1</sup>H NMR (300 MHz, CDCl<sub>3</sub>) δ 7.94 (d, *J* = 8.3 Hz, 1H), 7.89 (d, *J* = 1.6 Hz, 1H), 7.75 (dd, *J* = 8.3, 1.8 Hz, 1H), 7.37 (dt, *J* = 5.7, 2.1 Hz, 2H), 7.31–7.27 (m, 2H), 7.25 (d, *J* = 3.6 Hz, 1H), 2.73 (t, *J* = 6.0 Hz, 2H), 2.12 (t, *J* = 6.0 Hz, 2H), 1.93–1.76 (m, 4H). <sup>13</sup>C NMR (75 MHz, CDCl<sub>3</sub>) δ 149.4, 147.3, 144.7, 136.1, 135.6, 133.4, 130.6, 128.5, 127.5, 126.6, 125.3, 124.1, 123.7, 123.3, 119.8, 119.2, 25.0, 24.7, 22.4, 22.0. HRMS (ESI) calcd. for C<sub>22</sub>H<sub>16</sub>F<sub>3</sub>N<sub>3</sub>O<sub>2</sub>S [MH<sup>+</sup>]: 444.0988; Found: 444.1002.

**3-Methyl-5-(4-nitrophenyl)-6-phenylimidazo[2,1-b]thiazole (3da)**

Yellow solid (49 mg, 58% yield), mp 230 °C. IR (KBr) 3087, 1598, 1516, 1480, 1441, 1344, 852, 735, 702 cm<sup>-1</sup>. <sup>1</sup>H NMR (300 MHz, CDCl<sub>3</sub>) δ 8.30 (d, *J* = 8.7 Hz, 2H), 7.64 (d, *J* = 8.7 Hz, 2H), 7.40 (dd, *J* = 6.8, 2.6 Hz, 2H), 7.27–7.21 (m, 3H), 6.42 (s, 1H), 1.96 (s, 3H). <sup>13</sup>C NMR (75 MHz, CDCl<sub>3</sub>) δ 150.7, 148.0, 144.8, 137.3, 133.7, 132.8, 129.1, 128.3, 127.4, 123.6, 120.9, 108.1, 15.5. HRMS (ESI) calcd. for C<sub>18</sub>H<sub>13</sub>N<sub>3</sub>O<sub>2</sub>S [MH<sup>+</sup>]: 336.0801; Found: 336.0806.

**5-(3,5-Bis(trifluoromethyl)phenyl)-3-methyl-6-phenylimidazo[2,1-b]thiazole (3db)**

White solid (44 mg, 41% yield), mp 176-178 °C. IR (KBr) 3061, 1603, 1543, 1472, 1443, 1342, 1280, 1171, 1134, 847, 807, 738, 708 cm<sup>-1</sup>. <sup>1</sup>H NMR (300 MHz, CDCl<sub>3</sub>) δ 7.98 (s, 1H), 7.94 (s, 2H), 7.41 (dd, *J* = 7.7, 1.8 Hz, 2H), 7.30–7.18 (m, 3H), 6.43 (s, 1H), 1.91 (s, 3H). <sup>13</sup>C NMR (75 MHz, CDCl<sub>3</sub>) δ 150.8, 145.1, 133.4, 132.8, 132.0, 128.9, 128.4, 127.5, 127.2, 124.7, 122.5, 121.1, 119.9, 108.4, 15.4. HRMS (ESI) calcd. for C<sub>20</sub>H<sub>12</sub>F<sub>6</sub>N<sub>2</sub>S [MH<sup>+</sup>]: 427.0698; Found: 427.0713.

### **3-Methyl-5-(4-nitro-3-(trifluoromethyl)phenyl)-6-phenylimidazo[2,1-b]thiazole (3dc)**

Orange solid (61 mg, 61% yield), mp 188-189 °C. IR (KBr) 3046, 1593, 1537, 1480, 1443, 1356, 1185, 1140, 861, 831, 723, 700 cm<sup>-1</sup>. <sup>1</sup>H NMR (300 MHz, CDCl<sub>3</sub>) δ 7.96 (d, *J* = 8.0 Hz, 1H), 7.92 (s, 1H), 7.78 (d, *J* = 9.5 Hz, 1H), 7.38 (dd, *J* = 7.3, 1.8 Hz, 2H), 7.31–7.23 (m, 3H), 6.47 (s, 1H), 2.00 (s, 3H). <sup>13</sup>C NMR (75 MHz, CDCl<sub>3</sub>) δ 151.3, 147.4, 145.7, 136.0, 135.7, 133.2, 130.9, 128.9, 128.5, 127.6, 125.3, 123.4, 119.8, 119.5, 109.9, 108.7, 15.7. HRMS (ESI) calcd. for C<sub>19</sub>H<sub>12</sub>F<sub>3</sub>N<sub>3</sub>O<sub>2</sub>S [MH<sup>+</sup>]: 404.0675; Found: 404.0692.

### **3-Methyl-2,5-bis(3-nitrophenyl)-6-phenylimidazo[2,1-b]thiazole (3dd)**

White solid (59 mg, 86% yield), mp 207-208 °C. IR (KBr) 3082, 1601, 1528, 1481, 1442, 1347, 869, 807, 753, 736, 706 cm<sup>-1</sup>. <sup>1</sup>H NMR (300 MHz, CDCl<sub>3</sub>) δ 8.39 (ddd, *J* = 9.3, 6.0, 2.1 Hz, 2H), 8.28 (ddd, *J* = 6.8, 3.2, 1.4 Hz, 2H), 7.87–7.82 (m, 1H), 7.79–7.75 (m, 1H), 7.67 (td, *J* = 7.8, 4.4 Hz, 2H), 7.47–7.42 (m, 2H), 7.28 (dd, *J* = 4.2, 1.4 Hz, 1H), 7.25–7.22 (m, 2H), 1.99 (s, 3H). <sup>13</sup>C NMR (75 MHz, CDCl<sub>3</sub>) δ 148.4, 148.1, 144.7, 138.0, 135.3, 133.4, 133.3, 132.2, 130.1, 129.7, 128.4, 127.5, 127.3, 126.6, 126.0, 124.2, 124.1, 123.4, 122.1, 120.8, 13.8. HRMS (ESI) calcd. for C<sub>24</sub>H<sub>16</sub>N<sub>4</sub>O<sub>4</sub>S [MH<sup>+</sup>]: 457.0965; Found: 457.0981.

## **2. Crystal data and structure refinement for 3aa**



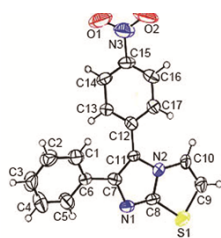

Figure S1. Representation ORTEP of **3aa**

| Compound                                    | <b>3aa</b>                                                      |
|---------------------------------------------|-----------------------------------------------------------------|
| Empirical formula                           | C <sub>17</sub> H <sub>11</sub> N <sub>3</sub> O <sub>2</sub> S |
| Formula weight (g.mol <sup>-1</sup> )       | 321.52                                                          |
| Temperature (K)                             | 296.24(11)                                                      |
| Crystal system                              | Trigonal                                                        |
| Space group                                 | <i>P</i> 3 <sub>2</sub>                                         |
| <i>a</i> (Å)                                | 18.3921(7)                                                      |
| <i>b</i> (Å)                                | 18.3921(7)                                                      |
| <i>c</i> (Å)                                | 23.2883(17)                                                     |
| <i>α</i> (deg)                              | 90.00                                                           |
| <i>β</i> (deg)                              | 90.00                                                           |
| <i>γ</i> (deg)                              | 120.00                                                          |
| Volume (Å <sup>3</sup> )                    | 6822.3(6)                                                       |
| <i>Z</i>                                    | 18                                                              |
| $\rho_{\text{calcd}}$ (g mm <sup>-3</sup> ) | 1409                                                            |
| $\mu$ (mm <sup>-1</sup> )                   | 0.226                                                           |
| <i>F</i> (000)                              | 2991.0                                                          |
| Crystal size (mm <sup>3</sup> )             | 0.21 × 0.12 × 0.08                                              |
| Theta range for data collection (deg)       | 5.84 to 52.04                                                   |
| Index ranges                                | -17 ≤ <i>h</i> ≤ 22, -17 ≤ <i>k</i> ≤ 22, -28 ≤ <i>l</i> ≤ 16   |
| Reflections collected                       | 18450                                                           |

|                                                 |                                  |
|-------------------------------------------------|----------------------------------|
| Independent reflections                         | 11422 [R(int) = 0.0495]          |
| Data/restraints/parameters                      | 11422/91/1244                    |
| Goodness-of-fit on $F^2$                        | 1.104                            |
| Final R indexes [ $I \geq 2\sigma(I)$ ]         | $R_1 = 0.0619$ , $wR_2 = 0.1242$ |
| Final R indexes [all data]                      | $R_1 = 0.1152$ , $wR_2 = 0.1454$ |
| Largest diff. peak/hole (e. $\text{\AA}^{-3}$ ) | 0.24/-0.26                       |
| Flack parameter                                 | 0.01(9)                          |
| CCDC deposition number:                         | 942540                           |

---

### 3. Computational Details

Geometries, energies, and first- and second-energy derivatives of all of the stationary points found here were fully optimized by hybrid density functional theory (DFT) using the GAUSSIAN 09 program suite.<sup>1</sup> For the DFT calculations, we used the hybrid gradient-corrected exchange functional of Lee, Yang, and Parr.<sup>2, 3</sup> The 6-31G<sup>4</sup> basis set with polarization (d and p) were selected for all the atoms except Palladium, for which the Stuttgart-Dresden effective core potential<sup>5</sup> was utilized to accurately account for relativistic effects and to substantially reduce the number of electrons in the system. Vibrational frequency calculations done at the B3LYP /6-31G (d, p) level of theory were used to characterize all of the stationary points as either minima (the number of imaginary frequencies (NIMAG=0) or transition states (NIMAG=1)). The relative energies are, thus, corrected for the vibrational zero-point energies (ZPE, not scaled). To minimize the computation times, the Pd catalyst was modeled with the PMe<sub>3</sub> to replace PPh<sub>3</sub> ligand, as well as the acetate base (Figure S2, A and B).<sup>6</sup>

**Figure S2. The optimized structures of substrates (1a, 1d) and [Pd(PMe<sub>3</sub>)(PhNO<sub>2</sub>)(OAc)] catalyst.**

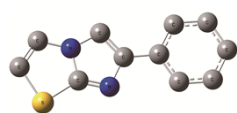

**1a**

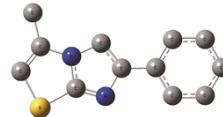

**1d**

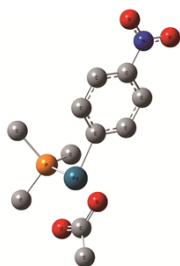

**[Pd(PMe<sub>3</sub>)(*p*-NO<sub>2</sub>Ph)(OAc)] catalyst (A)**

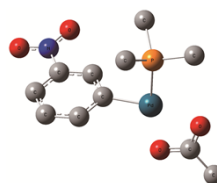

**[Pd(PMe<sub>3</sub>)(*m*-NO<sub>2</sub>Ph)(OAc)] catalyst (B)**

**Figure S3. CMD TS structures at different sites (C2, C3, C5 of 1a and C2, C5 of 1d).**

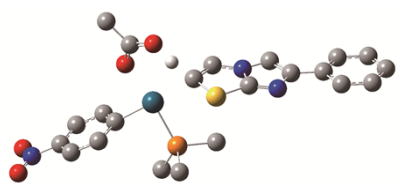

**TS-2a (C)**

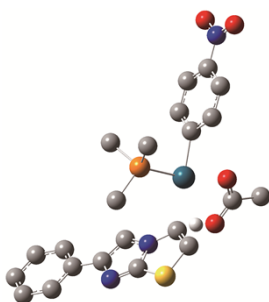

**TS-3a (D)**

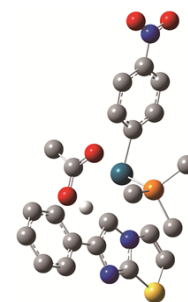

**TS-1a (E)**

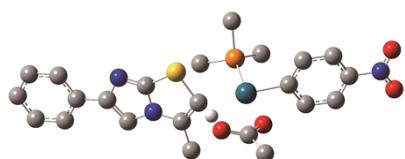

**TS-2da (F)**

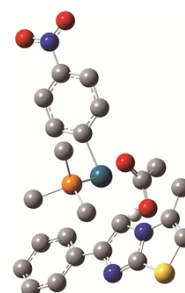

**TS-1da (G)**

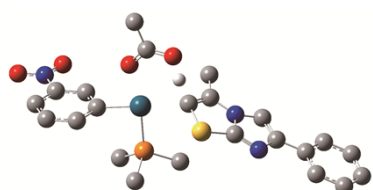

**TS-2db (H)**

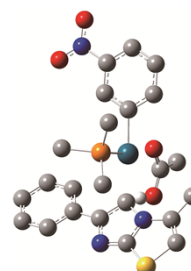

**TS-1db (I)**

**Figure S4. CMD intermediates structures at different sites (C2, C3, C5 of 1a and C2, C5 of 1d).**

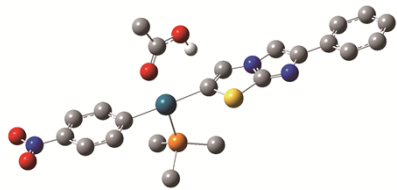

**I-2a + HOAc (J)**

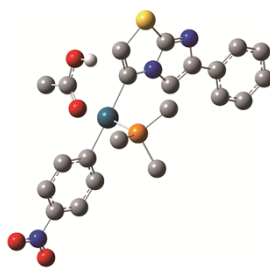

**I-3a + HOAc (K)**

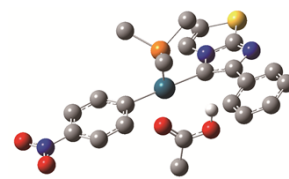

**I-1a + HOAc (L)**

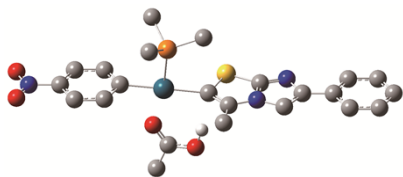

**I-2da + HOAc (M)**

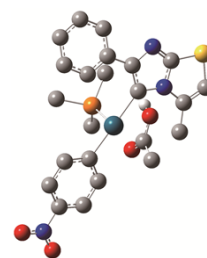

**I-1da + HOAc (N)**

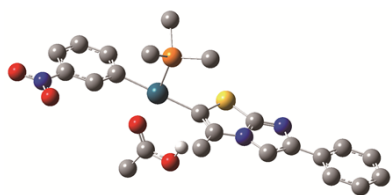

**I-2db + HOAc (O)**

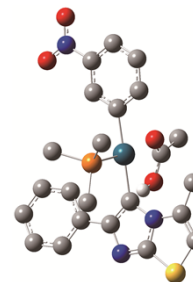

**I-1db + HOAc (P)**

**Sum of electronic and zero-point Energies (E, Hartree), Sum of electronic and thermal Free Energies (G, Hartree) and Cartesian coordinates of all geometries for CMD transition states and**

intermediates with the [Pd(PMe<sub>3</sub>)(PhNO<sub>2</sub>)(OAc)] catalyst.

**1a**

E= -931.509599

G= -931.547501

|   |             |             |             |
|---|-------------|-------------|-------------|
| C | -1.72921000 | -0.49644500 | -0.00015300 |
| C | -3.07744800 | 1.40844500  | 0.00078500  |
| C | -0.47947000 | 1.32563300  | 0.00067400  |
| C | 0.29380800  | 0.17560600  | 0.00007400  |
| N | -1.79083800 | 0.88429900  | 0.00075900  |
| C | -4.02277200 | 0.44286100  | 0.00015800  |
| N | -0.50739700 | -0.96081200 | -0.00045400 |
| C | 1.75873200  | 0.06140700  | -0.00004300 |
| C | 2.58633400  | 1.19685600  | -0.00105000 |
| C | 2.36063300  | -1.20741000 | 0.00091100  |
| C | 3.97278200  | 1.06721100  | -0.00099700 |
| H | 2.14614500  | 2.18997400  | -0.00201400 |
| C | 3.74791400  | -1.33391100 | 0.00091900  |
| H | 1.72196100  | -2.08351600 | 0.00163800  |
| C | 4.56143000  | -0.19936600 | -0.00000400 |
| H | 4.59547200  | 1.95737300  | -0.00179100 |
| H | 4.19567800  | -2.32371900 | 0.00167200  |
| H | 5.64282300  | -0.29965800 | 0.00001700  |
| H | -5.09300500 | 0.58329500  | 0.00012400  |
| H | -3.23240000 | 2.47791100  | 0.00148300  |
| H | -0.23013600 | 2.37382800  | 0.00160300  |
| S | -3.34345600 | -1.18657600 | -0.00078300 |

**1d**

E= -970.807193

G= -970.846717

|   |             |             |             |
|---|-------------|-------------|-------------|
| C | -1.41742000 | -0.86142700 | -0.00039600 |
| C | -2.94718900 | 0.91972800  | 0.00071500  |
| C | -0.35116400 | 1.07302300  | -0.00000300 |
| C | 0.53090200  | 0.00371700  | -0.00017000 |
| N | -1.61344800 | 0.50496600  | 0.00026900  |
| C | -3.78469400 | -0.14491700 | 0.00056900  |
| N | -0.15564100 | -1.20490200 | -0.00062800 |
| C | 1.99989000  | 0.03316000  | -0.00015800 |
| C | 2.71315400  | 1.24383900  | -0.00083100 |
| C | 2.72327200  | -1.17061800 | 0.00051300  |
| C | 4.10566900  | 1.25030100  | -0.00075500 |
| H | 2.17818000  | 2.18935700  | -0.00148800 |
| C | 4.11627600  | -1.16101600 | 0.00055500  |
| H | 2.17330800  | -2.10497900 | 0.00099400  |
| C | 4.81537400  | 0.04742200  | -0.00005800 |
| H | 4.63833500  | 2.19714000  | -0.00128400 |
| H | 4.65853000  | -2.10243000 | 0.00108500  |
| H | 5.90141300  | 0.05325300  | -0.00001800 |
| H | -4.86385900 | -0.11040200 | 0.00094000  |

|   |             |             |             |
|---|-------------|-------------|-------------|
| H | -0.20279300 | 2.14003400  | 0.00038500  |
| S | -2.95532900 | -1.70431200 | -0.00069900 |
| C | -3.28613400 | 2.37394700  | 0.00140400  |
| H | -2.87634000 | 2.87558700  | 0.88602200  |
| H | -2.87661300 | 2.87638100  | -0.88289200 |
| H | -4.36889300 | 2.51163900  | 0.00163800  |

**[Pd(PMe<sub>3</sub>)(*p*-NO<sub>2</sub>Ph)(OAc)] catalyst (A)**

E= -1253.477185

G= -1253.532074

|    |             |             |             |
|----|-------------|-------------|-------------|
| Pd | -1.25875400 | -0.26782800 | -0.00092000 |
| P  | -1.31623800 | 1.98684400  | -0.00004600 |
| C  | -3.06155400 | 2.57007700  | -0.00109800 |
| H  | -3.57357900 | 2.17781700  | 0.88079200  |
| H  | -3.11204900 | 3.66355900  | -0.00092300 |
| H  | -3.57233300 | 2.17816600  | -0.88386300 |
| C  | -0.55803800 | 2.83383000  | -1.44712700 |
| H  | -0.67899800 | 3.91887500  | -1.36924100 |
| H  | 0.50512100  | 2.58856000  | -1.49628700 |
| H  | -1.03612400 | 2.48381800  | -2.36564300 |
| C  | -0.55999300 | 2.83316700  | 1.44845000  |
| H  | -0.68141100 | 3.91820200  | 1.37117800  |
| H  | -1.03887000 | 2.48228100  | 2.36621800  |
| H  | 0.50325000  | 2.58845900  | 1.49853700  |
| C  | 0.73613200  | -0.20124000 | -0.00004200 |
| C  | 1.45437500  | -0.25125600 | -1.20930400 |
| C  | 1.45432200  | -0.24588300 | 1.20945600  |
| C  | 2.84501300  | -0.34994800 | -1.21730400 |
| H  | 0.92557900  | -0.22861900 | -2.15800000 |
| C  | 2.84496700  | -0.34462600 | 1.21794800  |
| H  | 0.92555600  | -0.21882400 | 2.15806100  |
| C  | 3.52339600  | -0.39038800 | 0.00043600  |
| H  | 3.40860600  | -0.39623500 | -2.14139200 |
| H  | 3.40853400  | -0.38687100 | 2.14224600  |
| N  | 4.98673400  | -0.47985700 | 0.00067100  |
| O  | 5.56063000  | -0.51049800 | 1.09082600  |
| O  | 5.56067500  | -0.51537200 | -1.08930700 |
| C  | -2.95078100 | -2.12951000 | -0.00353200 |
| O  | -3.34481900 | -0.91480100 | -0.00303700 |
| O  | -1.70104500 | -2.38742000 | -0.00387500 |
| C  | -3.94626300 | -3.26039600 | 0.00715900  |
| H  | -3.70999400 | -3.96546100 | -0.79437900 |
| H  | -3.86474400 | -3.80336600 | 0.95409700  |
| H  | -4.96242200 | -2.88216100 | -0.11021200 |
| Pd | 0.57250009  | 3.99335237  | 3.12376829  |
| P  | 0.51501609  | 6.24802437  | 3.12464229  |
| C  | -1.23029991 | 6.83125737  | 3.12359029  |
| H  | -1.74232491 | 6.43899737  | 4.00548029  |
| H  | -1.28079491 | 7.92473937  | 3.12376529  |
| H  | -1.74107891 | 6.43934637  | 2.24082529  |
| C  | 1.27321609  | 7.09501037  | 1.67756129  |

|   |             |            |            |
|---|-------------|------------|------------|
| H | 1.15225609  | 8.18005537 | 1.75544729 |
| H | 2.33637509  | 6.84974037 | 1.62840129 |
| H | 0.79513009  | 6.74499837 | 0.75904529 |
| C | 1.27126109  | 7.09434737 | 4.57313829 |
| H | 1.14984309  | 8.17938237 | 4.49586629 |
| H | 0.79238409  | 6.74346137 | 5.49090629 |
| H | 2.33450409  | 6.84963937 | 4.62322529 |
| C | 2.56738609  | 4.05994037 | 3.12464629 |
| C | 3.28562909  | 4.00992437 | 1.91538429 |
| C | 3.28557609  | 4.01529737 | 4.33414429 |
| C | 4.67626709  | 3.91123237 | 1.90738429 |
| H | 2.75683309  | 4.03256137 | 0.96668829 |
| C | 4.67622109  | 3.91655437 | 4.34263629 |
| H | 2.75681009  | 4.04235637 | 5.28274929 |
| C | 5.35465009  | 3.87079237 | 3.12512429 |
| H | 5.23986009  | 3.86494537 | 0.98329629 |
| H | 5.23978809  | 3.87430937 | 5.26693429 |
| N | 6.81798809  | 3.78132337 | 3.12535929 |
| O | 7.39188409  | 3.75068237 | 4.21551429 |
| O | 7.39192909  | 3.74580837 | 2.03538129 |
| C | -1.11952691 | 2.13167037 | 3.12115629 |
| O | -1.51356491 | 3.34637937 | 3.12165129 |
| O | 0.13020909  | 1.87376037 | 3.12081329 |
| C | -2.11500891 | 1.00078437 | 3.13184729 |
| H | -1.87873991 | 0.29571937 | 2.33030929 |
| H | -2.03348991 | 0.45781437 | 4.07878529 |
| H | -3.13116791 | 1.37901937 | 3.01447629 |

**[Pd(PMe<sub>3</sub>)(*m*-NO<sub>2</sub>Ph)(OAc)] catalyst (B)**

E= -1253.476559

G= -1253.530372

|    |             |             |             |
|----|-------------|-------------|-------------|
| Pd | 1.14412800  | -0.22453300 | 0.04551900  |
| P  | 1.00505500  | 2.02635400  | 0.02564500  |
| C  | 2.64520800  | 2.75491600  | -0.38171500 |
| H  | 2.96317600  | 2.39766300  | -1.36407600 |
| H  | 2.60206800  | 3.84871300  | -0.38430000 |
| H  | 3.38251600  | 2.41705200  | 0.35034700  |
| C  | 0.53690000  | 2.82389800  | 1.61679000  |
| H  | 0.53148700  | 3.91432900  | 1.52258900  |
| H  | -0.45567700 | 2.47853200  | 1.91454200  |
| H  | 1.25018400  | 2.53256300  | 2.39208300  |
| C  | -0.13715200 | 2.78675300  | -1.20067100 |
| H  | -0.08001700 | 3.87886600  | -1.15661200 |
| H  | 0.13184100  | 2.45267000  | -2.20605200 |
| H  | -1.16198500 | 2.46974100  | -0.99596000 |
| C  | -0.78472400 | -0.33899800 | 0.56112000  |
| C  | -1.13072800 | -0.67934000 | 1.88140400  |
| C  | -1.80834300 | -0.25181200 | -0.39087700 |
| C  | -2.45871900 | -0.93895400 | 2.23968000  |
| H  | -0.35563300 | -0.76272000 | 2.63852700  |
| C  | -3.12695900 | -0.51195200 | -0.01080100 |



|   |             |             |             |
|---|-------------|-------------|-------------|
| H | -1.60975400 | -0.00282000 | -1.42617900 |
| C | -3.47702400 | -0.85784100 | 1.29237800  |
| H | -2.69836800 | -1.20950600 | 3.26412700  |
| C | 2.92929200  | -1.94964400 | -0.36174000 |
| O | 3.20733100  | -0.70911800 | -0.48297400 |
| O | 1.75191900  | -2.30226400 | -0.01913700 |
| C | 3.97290900  | -2.99702600 | -0.65143400 |
| H | 3.86517900  | -3.83627300 | 0.03900700  |
| H | 3.82107800  | -3.37800900 | -1.66718600 |
| H | 4.97445700  | -2.56932700 | -0.58430000 |
| H | -4.51330700 | -1.05196900 | 1.53750800  |
| N | -4.18924000 | -0.40533200 | -1.02531800 |
| O | -5.33750800 | -0.69201800 | -0.68638200 |
| O | -3.87077000 | -0.02772200 | -2.15403100 |

**TS-2a (C)**

E= -2184.951392

G= -2185.022488

|    |             |             |             |
|----|-------------|-------------|-------------|
| C  | 3.23033900  | 0.44402400  | 0.83487400  |
| C  | 1.66383300  | 1.11567100  | -0.75424100 |
| C  | 4.13573200  | 0.46202300  | -1.19088700 |
| C  | 5.04637400  | 0.06365900  | -0.22631600 |
| N  | 2.95731800  | 0.70490900  | -0.50340100 |
| C  | 0.84631100  | 1.18156100  | 0.34801800  |
| N  | 4.46202600  | 0.05611100  | 1.03787200  |
| C  | 6.45421700  | -0.31567900 | -0.40308800 |
| C  | 7.04468800  | -0.38355500 | -1.67680700 |
| C  | 7.24142500  | -0.61875300 | 0.72015400  |
| C  | 8.38318200  | -0.73992700 | -1.82191900 |
| H  | 6.45557900  | -0.15977300 | -2.56184500 |
| C  | 8.58007300  | -0.97587600 | 0.57154300  |
| H  | 6.78475900  | -0.56619200 | 1.70223400  |
| C  | 9.15813200  | -1.03776500 | -0.69810500 |
| H  | 8.82240000  | -0.78673500 | -2.81449700 |
| H  | 9.17479800  | -1.20543200 | 1.45132800  |
| H  | 10.20193500 | -1.31556400 | -0.81242200 |
| H  | 0.13704400  | 2.30206700  | 0.52330400  |
| H  | -1.49968600 | -4.06996200 | -0.08942200 |
| C  | -1.87636400 | -3.06768500 | -0.31645600 |
| P  | -0.76539400 | -1.79655200 | 0.42301600  |
| H  | -2.88723100 | -2.95810600 | 0.07881800  |
| H  | -1.91833300 | -2.93560900 | -1.40037700 |
| Pd | -1.29559300 | 0.40213600  | 0.05386600  |
| C  | 0.88464900  | -2.34000600 | -0.19098300 |
| C  | -0.73824000 | -2.25856600 | 2.20654400  |
| C  | -3.22445800 | -0.16763900 | -0.13390600 |
| O  | -2.05695000 | 2.33802200  | -0.41305500 |
| H  | 1.67827700  | -1.77803400 | 0.30243200  |
| H  | 0.94980100  | -2.17203900 | -1.26867200 |
| H  | 1.02431700  | -3.40617200 | 0.01351100  |
| H  | -0.47328900 | -3.31398000 | 2.32580900  |

|   |             |             |             |
|---|-------------|-------------|-------------|
| H | -0.00622500 | -1.64004500 | 2.73010400  |
| H | -1.72468900 | -2.08575300 | 2.64420500  |
| C | -4.03146100 | -0.38697600 | 0.99568800  |
| C | -3.81734500 | -0.22914000 | -1.40658100 |
| C | -1.51816700 | 3.40114100  | 0.02053200  |
| C | -5.39264500 | -0.66442500 | 0.86625200  |
| H | -3.60367900 | -0.33150900 | 1.99313400  |
| C | -5.17483500 | -0.50772800 | -1.55427700 |
| H | -3.22097100 | -0.04420500 | -2.29525000 |
| O | -0.39997600 | 3.44305800  | 0.62747500  |
| C | -2.26803300 | 4.69939000  | -0.17604700 |
| H | -6.02663000 | -0.83130000 | 1.72881300  |
| C | -5.94521700 | -0.72700900 | -0.41203800 |
| H | -5.64497000 | -0.55583300 | -2.52918700 |
| H | 1.37911900  | 1.37938000  | -1.76556300 |
| N | -7.37227000 | -1.03078600 | -0.55913000 |
| O | -7.83469100 | -1.08013400 | -1.70021000 |
| O | -8.02781300 | -1.22263600 | 0.46665300  |
| H | 4.21432700  | 0.60146800  | -2.25654700 |
| S | 1.79942400  | 0.72951200  | 1.80094000  |
| H | -1.58075200 | 5.54609700  | -0.16508000 |
| H | -2.97960500 | 4.81763300  | 0.64833300  |
| H | -2.83610300 | 4.66886800  | -1.10730800 |

**TS-3a (D)**

E= -2184.950655

G= -2185.020656

|   |             |             |             |
|---|-------------|-------------|-------------|
| C | -3.28926400 | 1.48897400  | -0.84543200 |
| C | -1.06458300 | 1.79297700  | -0.06039700 |
| C | -2.80164600 | 0.02640800  | 0.72643100  |
| C | -4.09173500 | -0.15585600 | 0.24572200  |
| N | -2.28638300 | 1.09100800  | 0.01298500  |
| C | -1.18639900 | 2.76985800  | -1.01514900 |
| N | -4.37985800 | 0.77077800  | -0.74977300 |
| C | -5.08914500 | -1.15305400 | 0.65947600  |
| C | -4.83158200 | -2.06547300 | 1.69713900  |
| C | -6.33391500 | -1.20881200 | 0.01077800  |
| C | -5.78723700 | -3.00755700 | 2.07083900  |
| H | -3.88094700 | -2.03618000 | 2.22262000  |
| C | -7.28821000 | -2.15174900 | 0.38745800  |
| H | -6.53469900 | -0.50157300 | -0.78640700 |
| C | -7.02099200 | -3.05646000 | 1.41720600  |
| H | -5.56958600 | -3.70292600 | 2.87680000  |
| H | -8.24577900 | -2.17959400 | -0.12529400 |
| H | -7.76626300 | -3.79039500 | 1.70994200  |
| H | -0.43392300 | 3.50337000  | -1.27078500 |
| H | 1.19922700  | -1.57676900 | -3.90644400 |
| C | 1.50886500  | -0.81689200 | -3.18219200 |
| P | 0.39035100  | -0.83614900 | -1.71756400 |
| H | 1.46743000  | 0.16633300  | -3.65863000 |
| H | 2.53686300  | -1.00715300 | -2.86939000 |

|    |             |             |             |
|----|-------------|-------------|-------------|
| Pd | 0.96579600  | 0.69787900  | -0.11259500 |
| C  | 0.42490900  | -2.59409700 | -1.16875400 |
| C  | -1.27208200 | -0.69594000 | -2.49254800 |
| C  | 2.76966500  | -0.21521800 | -0.03962800 |
| O  | 1.83904500  | 2.02769700  | 1.31136200  |
| H  | -0.30297900 | -2.73872500 | -0.36621100 |
| H  | 1.41725700  | -2.84759100 | -0.79210200 |
| H  | 0.17060500  | -3.25605900 | -2.00242500 |
| H  | -1.36254000 | -1.43364000 | -3.29602100 |
| H  | -2.05186300 | -0.87979600 | -1.75108700 |
| H  | -1.41110600 | 0.30433500  | -2.90822300 |
| C  | 3.85507400  | 0.31120300  | -0.76095500 |
| C  | 3.00603100  | -1.27545500 | 0.85186100  |
| C  | 1.13689000  | 2.57805900  | 2.21224000  |
| C  | 5.14102500  | -0.20487200 | -0.60512600 |
| H  | 3.70551600  | 1.14357200  | -1.44267700 |
| C  | 4.28651200  | -1.80247300 | 1.02147300  |
| H  | 2.18981700  | -1.69179100 | 1.43549300  |
| O  | -0.13665600 | 2.54344700  | 2.24645200  |
| C  | 1.85443100  | 3.29925300  | 3.32997000  |
| H  | 5.98660900  | 0.19464000  | -1.15205400 |
| C  | 5.33798600  | -1.26091400 | 0.28395600  |
| H  | 4.48287000  | -2.61620800 | 1.70923900  |
| H  | -0.52457600 | 2.09993800  | 1.12986800  |
| N  | 6.68635800  | -1.81522300 | 0.44881100  |
| O  | 6.83086600  | -2.74692500 | 1.24191900  |
| O  | 7.59648200  | -1.31893700 | -0.21686700 |
| H  | -2.23016900 | -0.46795900 | 1.49524100  |
| S  | -2.74857700 | 2.83767300  | -1.82926000 |
| H  | 2.00133000  | 2.59734500  | 4.15817300  |
| H  | 2.83389700  | 3.64143300  | 2.99377600  |
| H  | 1.25203900  | 4.13278200  | 3.69429400  |

### TS-1a (E)

E= -2184.957357

G= -2185.026593

|   |            |             |             |
|---|------------|-------------|-------------|
| C | 3.77342300 | -1.36199300 | -0.33347200 |
| C | 2.26131200 | -2.99293100 | 0.31889000  |
| C | 1.90174700 | -0.41620200 | 0.50983100  |
| C | 2.88776100 | 0.51863000  | 0.09770500  |
| N | 2.54543500 | -1.64045700 | 0.20536200  |
| C | 3.26802300 | -3.77229000 | -0.13935200 |
| N | 4.02084500 | -0.07065300 | -0.42575000 |
| C | 2.81879200 | 1.98472900  | 0.20554900  |
| C | 1.78385900 | 2.62396400  | 0.91380500  |
| C | 3.80738100 | 2.78041200  | -0.40097900 |
| C | 1.73644200 | 4.01378800  | 1.00313400  |
| H | 1.02325500 | 2.02828100  | 1.40794100  |
| C | 3.75442100 | 4.17009600  | -0.31160800 |
| H | 4.61431900 | 2.28885600  | -0.93317200 |
| C | 2.71888100 | 4.79420200  | 0.38823200  |

|    |             |             |             |
|----|-------------|-------------|-------------|
| H  | 0.93385200  | 4.48818900  | 1.56105700  |
| H  | 4.52675300  | 4.76816300  | -0.78730300 |
| H  | 2.68048000  | 5.87739600  | 0.45914700  |
| H  | 3.30422500  | -4.85113000 | -0.15797100 |
| H  | -1.22475100 | -0.33022500 | -4.18724400 |
| C  | -1.45558200 | -0.54195000 | -3.13832600 |
| P  | -0.07780500 | 0.03831800  | -2.05928200 |
| H  | -1.59709800 | -1.61819500 | -3.01159900 |
| H  | -2.38402700 | -0.04206100 | -2.85853200 |
| Pd | -0.30166000 | -0.29868300 | 0.18489700  |
| C  | 0.07651200  | 1.81759500  | -2.50838100 |
| C  | 1.38474800  | -0.73570900 | -2.86776900 |
| C  | -2.31792500 | -0.17037100 | -0.04829300 |
| O  | -0.78144700 | -0.63292300 | 2.25184100  |
| H  | 0.93167700  | 2.25496400  | -1.98880300 |
| H  | -0.82783200 | 2.34949300  | -2.20237600 |
| H  | 0.20804300  | 1.92838200  | -3.58958800 |
| H  | 1.36441800  | -0.53460900 | -3.94361400 |
| H  | 2.30732800  | -0.33459600 | -2.44511000 |
| H  | 1.36645200  | -1.81683800 | -2.70875900 |
| C  | -3.10542400 | -1.33642100 | -0.05303000 |
| C  | -2.97661700 | 1.07246300  | -0.08225400 |
| C  | 0.05433000  | -0.56103400 | 3.19515700  |
| C  | -4.49689900 | -1.27365100 | -0.09198600 |
| H  | -2.63029400 | -2.31295400 | -0.01331300 |
| C  | -4.36854100 | 1.15738500  | -0.12077600 |
| H  | -2.40173200 | 1.99487200  | -0.06576800 |
| O  | 1.30775200  | -0.35736100 | 3.03832700  |
| C  | -0.44429400 | -0.70053600 | 4.61551600  |
| H  | -5.11021200 | -2.16681900 | -0.09218600 |
| C  | -5.11220800 | -0.02195000 | -0.13008600 |
| H  | -4.88352300 | 2.11041400  | -0.14324500 |
| H  | 1.31879400  | -3.31342800 | 0.74012700  |
| N  | -6.57462200 | 0.05525600  | -0.18184300 |
| O  | -7.09148500 | 1.17381300  | -0.21970400 |
| O  | -7.20738700 | -1.00266800 | -0.18746600 |
| H  | 1.55393600  | -0.33879600 | 1.84410400  |
| S  | 4.63601200  | -2.82870500 | -0.73630000 |
| H  | -0.44018800 | 0.28764900  | 5.08743900  |
| H  | -1.45914000 | -1.09780300 | 4.62776600  |
| H  | 0.23056200  | -1.34056400 | 5.18836000  |

### TS-2da (F)

E= -2224.248639

G= -2224.321098

|   |             |            |             |
|---|-------------|------------|-------------|
| C | -3.17113100 | 0.29812300 | -0.90020000 |
| C | -1.67834700 | 1.06970900 | 0.73524700  |
| C | -4.17538100 | 0.45748300 | 1.07147000  |
| C | -5.04134800 | 0.00144400 | 0.09134000  |
| N | -2.96130900 | 0.64486900 | 0.42818300  |
| C | -0.81260600 | 1.05775400 | -0.34002400 |

|    |              |             |             |
|----|--------------|-------------|-------------|
| N  | -4.39505600  | -0.09499900 | -1.13832600 |
| C  | -6.46019400  | -0.35482100 | 0.22222500  |
| C  | -7.11994700  | -0.31059000 | 1.46261500  |
| C  | -7.18823600  | -0.74869700 | -0.91273400 |
| C  | -8.46755300  | -0.64717300 | 1.56386200  |
| H  | -6.57830600  | -0.01285100 | 2.35616100  |
| C  | -8.53624100  | -1.08564500 | -0.80803200 |
| H  | -6.67840900  | -0.78189500 | -1.86915500 |
| C  | -9.18304700  | -1.03641600 | 0.42860000  |
| H  | -8.96065200  | -0.60624800 | 2.53109300  |
| H  | -9.08440900  | -1.38663800 | -1.69648200 |
| H  | -10.23412100 | -1.29840600 | 0.50857100  |
| H  | -0.17965600  | 2.21623500  | -0.53903900 |
| H  | 1.56499000   | -4.05587700 | 0.61584100  |
| C  | 1.93431800   | -3.03070200 | 0.71789600  |
| P  | 0.82528200   | -1.86765500 | -0.18505100 |
| H  | 2.94791900   | -2.96520300 | 0.32011400  |
| H  | 1.96660900   | -2.76382300 | 1.77717500  |
| Pd | 1.33965000   | 0.36064900  | -0.07420500 |
| C  | -0.83187600  | -2.36750100 | 0.44732700  |
| C  | 0.84666900   | -2.52259700 | -1.90645600 |
| C  | 3.28386600   | -0.18412700 | 0.07981100  |
| O  | 2.12688400   | 2.33776900  | 0.08995600  |
| H  | -1.61986800  | -1.86718200 | -0.11643500 |
| H  | -0.92169800  | -2.09490800 | 1.50177200  |
| H  | -0.95637000  | -3.45053400 | 0.34840200  |
| H  | 0.61279100   | -3.59182500 | -1.91539200 |
| H  | 0.10974500   | -1.98458400 | -2.50685500 |
| H  | 1.83757300   | -2.36765400 | -2.34032100 |
| C  | 4.04676900   | -0.48376300 | -1.06223900 |
| C  | 3.93181800   | -0.14670100 | 1.32694500  |
| C  | 1.50526000   | 3.37288200  | -0.29626300 |
| C  | 5.41458400   | -0.74271800 | -0.97042200 |
| H  | 3.57879900   | -0.50471000 | -2.04290100 |
| C  | 5.29700900   | -0.40355100 | 1.43803300  |
| H  | 3.37179900   | 0.09740200  | 2.22523200  |
| O  | 0.29817600   | 3.37981800  | -0.69952100 |
| C  | 2.25994900   | 4.68377900  | -0.30335800 |
| H  | 6.01321500   | -0.97083100 | -1.84417000 |
| C  | 6.02120800   | -0.70419900 | 0.28408600  |
| H  | 5.80790500   | -0.37467700 | 2.39300900  |
| N  | 7.45578900   | -0.98665100 | 0.39317300  |
| O  | 7.96653500   | -0.94405700 | 1.51387200  |
| O  | 8.06965100   | -1.25369000 | -0.64158300 |
| H  | -4.30663800  | 0.66436600  | 2.12058100  |
| S  | -1.69500700  | 0.51347200  | -1.81026400 |
| C  | -1.37791900  | 1.53573200  | 2.12387000  |
| H  | -2.03813200  | 2.36419100  | 2.40844400  |
| H  | -1.52836900  | 0.73137200  | 2.85509900  |
| H  | -0.34222900  | 1.87153300  | 2.19189000  |
| H  | 3.00270000   | 4.69668400  | 0.49576500  |
| H  | 2.78895300   | 4.77354100  | -1.25841600 |

H 1.57112900 5.52447100 -0.21116300

**TS-1da (G)**

E= -2224.25381

G= -2224.324779

|    |             |             |             |
|----|-------------|-------------|-------------|
| C  | 3.86676700  | -0.96689100 | -0.40552900 |
| C  | 2.57550600  | -2.80197300 | 0.22385000  |
| C  | 1.90963700  | -0.28376900 | 0.49640100  |
| C  | 2.77214300  | 0.77588600  | 0.11057000  |
| N  | 2.69074200  | -1.41261800 | 0.13749800  |
| C  | 3.66909600  | -3.41762500 | -0.29094000 |
| N  | 3.95671800  | 0.34679700  | -0.45207500 |
| C  | 2.53005700  | 2.22081000  | 0.26071400  |
| C  | 1.46092600  | 2.71811300  | 1.02908800  |
| C  | 3.38482800  | 3.14254900  | -0.37090400 |
| C  | 1.24773100  | 4.09013500  | 1.14956000  |
| H  | 0.80219500  | 2.02707300  | 1.54433300  |
| C  | 3.16700000  | 4.51387000  | -0.24988800 |
| H  | 4.22036700  | 2.76272000  | -0.94852300 |
| C  | 2.09671600  | 4.99542800  | 0.50769100  |
| H  | 0.42057100  | 4.45289900  | 1.75352700  |
| H  | 3.83778700  | 5.20941900  | -0.74671100 |
| H  | 1.92933400  | 6.06441100  | 0.60291000  |
| H  | 3.84566500  | -4.48190800 | -0.33922500 |
| H  | -1.17935600 | -0.44654500 | -4.22386000 |
| C  | -1.40516600 | -0.65063700 | -3.17237900 |
| P  | -0.07841400 | 0.04289700  | -2.09594600 |
| H  | -1.47534800 | -1.73128400 | -3.02429100 |
| H  | -2.36775400 | -0.20892100 | -2.91091500 |
| Pd | -0.29890500 | -0.25785700 | 0.15134500  |
| C  | -0.04747700 | 1.82276600  | -2.56649200 |
| C  | 1.44083200  | -0.63149000 | -2.88783000 |
| C  | -2.31813300 | -0.18469200 | -0.09690500 |
| O  | -0.79644000 | -0.49422500 | 2.23798500  |
| H  | 0.77277300  | 2.32454900  | -2.04839500 |
| H  | -0.98795700 | 2.29304000  | -2.26964300 |
| H  | 0.08169400  | 1.93062100  | -3.64837100 |
| H  | 1.40557700  | -0.45388300 | -3.96737800 |
| H  | 2.32704100  | -0.14772000 | -2.47408500 |
| H  | 1.51139100  | -1.70694400 | -2.70713600 |
| C  | -3.07158800 | -1.37281100 | -0.12996100 |
| C  | -3.01350400 | 1.03842100  | -0.10233200 |
| C  | 0.03767700  | -0.51897800 | 3.18063600  |
| C  | -4.46446500 | -1.35082300 | -0.16419200 |
| H  | -2.56800200 | -2.33598800 | -0.11796500 |
| C  | -4.40739100 | 1.08285300  | -0.13736600 |
| H  | -2.46600300 | 1.97660400  | -0.06409300 |
| O  | 1.30954500  | -0.43797700 | 3.02592800  |
| C  | -0.46707700 | -0.62700400 | 4.60070400  |
| H  | -5.05116000 | -2.26147900 | -0.18460600 |
| C  | -5.11628900 | -0.11728100 | -0.17143800 |

|   |             |             |             |
|---|-------------|-------------|-------------|
| H | -4.95026600 | 2.02055700  | -0.13725900 |
| N | -6.58052700 | -0.08243900 | -0.21654900 |
| O | -7.13058100 | 1.02071600  | -0.22584500 |
| O | -7.18156600 | -1.15839900 | -0.24509000 |
| H | 1.55114100  | -0.33454700 | 1.86603400  |
| S | 4.89656700  | -2.29410400 | -0.88024300 |
| C | 1.38071300  | -3.43446800 | 0.85950400  |
| H | 1.31621100  | -3.15563600 | 1.91687900  |
| H | 0.45354100  | -3.10018700 | 0.38018900  |
| H | 1.44441300  | -4.52238700 | 0.78949200  |
| H | -1.50805600 | -0.94971800 | 4.61191400  |
| H | -0.39238500 | 0.35703900  | 5.07558900  |
| H | 0.15993200  | -1.31556500 | 5.17148400  |

**TS-2db (H)**

E= -2224.248533

G= -2224.321527

|    |              |             |             |
|----|--------------|-------------|-------------|
| C  | -3.09373400  | 0.49826500  | -0.80974800 |
| C  | -1.48706600  | 0.95547700  | 0.83592300  |
| C  | -3.97547700  | 0.33891400  | 1.21991100  |
| C  | -4.90858700  | 0.06528100  | 0.23352000  |
| N  | -2.79755600  | 0.61480100  | 0.54225100  |
| C  | -0.68633700  | 1.11012400  | -0.27819400 |
| N  | -4.33850100  | 0.16635400  | -1.03298200 |
| C  | -6.32470500  | -0.29090600 | 0.39145300  |
| C  | -6.92094600  | -0.39747100 | 1.65986400  |
| C  | -7.11451400  | -0.53238700 | -0.74491700 |
| C  | -8.26607500  | -0.73494200 | 1.78751800  |
| H  | -6.33226600  | -0.21419000 | 2.55443500  |
| C  | -8.46000000  | -0.87023400 | -0.61387200 |
| H  | -6.65401900  | -0.44775800 | -1.72296300 |
| C  | -9.04290800  | -0.97338000 | 0.65087200  |
| H  | -8.70959100  | -0.81136800 | 2.77635900  |
| H  | -9.05626600  | -1.05267500 | -1.50362200 |
| H  | -10.09209300 | -1.23586500 | 0.75142000  |
| H  | -0.04203700  | 2.27043100  | -0.29301800 |
| H  | 1.52688200   | -4.13161400 | -0.01567300 |
| C  | 1.93553400   | -3.13190400 | 0.16226200  |
| P  | 0.84489700   | -1.85873300 | -0.60523000 |
| H  | 2.94058000   | -3.06699100 | -0.25641600 |
| H  | 2.00411900   | -2.95897400 | 1.23937600  |
| Pd | 1.45131300   | 0.32957500  | -0.33312500 |
| C  | -0.81176200  | -2.36392300 | 0.02357500  |
| C  | 0.79375000   | -2.36121700 | -2.37699300 |
| C  | 3.37856600   | -0.29497600 | -0.44660100 |
| O  | 2.35117400   | 2.24769700  | -0.10379300 |
| H  | -1.59673700  | -1.80026500 | -0.48165900 |
| H  | -0.87394600  | -2.17439600 | 1.09773600  |
| H  | -0.96735400  | -3.43191400 | -0.15885600 |
| H  | 0.51258200   | -3.41478000 | -2.47207200 |
| H  | 0.06530200   | -1.74230200 | -2.90592600 |

|   |             |             |             |
|---|-------------|-------------|-------------|
| H | 1.77820800  | -2.20898600 | -2.82585100 |
| C | 4.03788600  | -0.42469600 | -1.67920600 |
| C | 4.12434500  | -0.46634800 | 0.72578600  |
| C | 1.71738600  | 3.34464400  | -0.15094700 |
| C | 5.40707800  | -0.71606100 | -1.74575100 |
| H | 3.48852500  | -0.28353000 | -2.60686300 |
| C | 5.48599100  | -0.75996800 | 0.63865000  |
| H | 3.67891900  | -0.36670600 | 1.70824700  |
| O | 0.45531000  | 3.44482100  | -0.27349700 |
| C | 2.52477700  | 4.62273700  | -0.08530700 |
| H | 5.89487500  | -0.80487200 | -2.71248200 |
| C | 6.14909300  | -0.89028500 | -0.58093600 |
| H | -4.03759300 | 0.36406100  | 2.29513500  |
| S | -1.66794300 | 0.83753600  | -1.76136400 |
| C | -1.09144200 | 1.17414300  | 2.26104100  |
| H | -1.71328200 | 1.95021300  | 2.72371500  |
| H | -1.21575700 | 0.25891200  | 2.85379400  |
| H | -0.04603300 | 1.48031600  | 2.31871200  |
| H | 7.20697100  | -1.11894100 | -0.59582100 |
| N | 6.25230100  | -0.94563500 | 1.88302400  |
| O | 7.45791300  | -1.17638500 | 1.78514600  |
| O | 5.64460100  | -0.86478600 | 2.95137400  |
| H | 3.40987100  | 4.47828600  | 0.53621700  |
| H | 1.91354100  | 5.44428500  | 0.29039500  |
| H | 2.85905000  | 4.87482600  | -1.09759400 |

**TS-1db (I)**

E= -2224.253423

G= -2224.324379

|   |             |             |             |
|---|-------------|-------------|-------------|
| C | 3.91397300  | -0.14800400 | -0.43885800 |
| C | 3.14285100  | -2.29755800 | 0.02530000  |
| C | 1.85097200  | -0.06527900 | 0.48159000  |
| C | 2.40789000  | 1.20820700  | 0.19021000  |
| N | 2.89607500  | -0.92327300 | 0.05020200  |
| C | 4.35453900  | -2.56855800 | -0.52120600 |
| N | 3.66154600  | 1.14375800  | -0.38286400 |
| C | 1.80053200  | 2.52567800  | 0.44397900  |
| C | 0.62267600  | 2.66632400  | 1.20151100  |
| C | 2.40354100  | 3.68557100  | -0.07571400 |
| C | 0.06069300  | 3.92292600  | 1.41917400  |
| H | 0.14939400  | 1.78829000  | 1.62851400  |
| C | 1.83800100  | 4.94045100  | 0.14303600  |
| H | 3.32026700  | 3.58202900  | -0.64565200 |
| C | 0.66306000  | 5.06625700  | 0.88807400  |
| H | -0.84769700 | 4.00900000  | 2.00879900  |
| H | 2.31797600  | 5.82415000  | -0.26841000 |
| H | 0.22318300  | 6.04477000  | 1.05765300  |
| H | 4.79896600  | -3.54426800 | -0.65038700 |
| H | -1.11529300 | -0.70207500 | -4.26097800 |
| C | -1.26130000 | -1.03461700 | -3.22841500 |
| P | -0.18010700 | -0.06502800 | -2.09192100 |



|    |             |             |             |
|----|-------------|-------------|-------------|
| H  | -1.01450000 | -2.09705800 | -3.15619700 |
| H  | -2.30728500 | -0.90682800 | -2.94686100 |
| Pd | -0.28755700 | -0.58648900 | 0.12400000  |
| C  | -0.65715100 | 1.67847500  | -2.44060600 |
| C  | 1.46285700  | -0.22537200 | -2.90707800 |
| C  | -2.27299400 | -0.98888600 | -0.13093400 |
| O  | -0.66598100 | -1.15271500 | 2.17185600  |
| H  | -0.01818100 | 2.35232500  | -1.86557500 |
| H  | -1.69503300 | 1.84240700  | -2.14194300 |
| H  | -0.55311100 | 1.89674700  | -3.50848900 |
| H  | 1.37075700  | -0.00317100 | -3.97488600 |
| H  | 2.17594300  | 0.46722200  | -2.45699600 |
| H  | 1.84061000  | -1.24344200 | -2.78571800 |
| C  | -2.73636300 | -2.31649300 | -0.14735700 |
| C  | -3.22826500 | 0.03525900  | -0.15655100 |
| C  | 0.14864200  | -1.00569300 | 3.12066000  |
| C  | -4.10286900 | -2.61711500 | -0.18462300 |
| H  | -2.02289500 | -3.13635900 | -0.11727400 |
| C  | -4.58895500 | -0.28197200 | -0.19641100 |
| H  | -2.94707300 | 1.08164800  | -0.13409300 |
| O  | 1.34007500  | -0.54708100 | 2.98962200  |
| C  | -0.29147500 | -1.36223600 | 4.52169400  |
| H  | -4.42996600 | -3.65333000 | -0.19115800 |
| C  | -5.05060800 | -1.59631300 | -0.21149600 |
| H  | 1.53489700  | -0.29975500 | 1.84080800  |
| S  | 5.24801000  | -1.12362300 | -1.00137900 |
| C  | 2.15604400  | -3.26365400 | 0.59504200  |
| H  | 2.05248800  | -3.11360400 | 1.67528500  |
| H  | 1.16310300  | -3.12092400 | 0.15354500  |
| H  | 2.48221500  | -4.29045300 | 0.41643000  |
| H  | -6.11461900 | -1.79262900 | -0.24332000 |
| N  | -5.57247300 | 0.81271800  | -0.23371500 |
| O  | -6.76715700 | 0.51300500  | -0.23105000 |
| O  | -5.14745700 | 1.96887400  | -0.27140200 |
| H  | -0.55746900 | -0.43991000 | 5.04917600  |
| H  | -1.16413700 | -2.01488600 | 4.49228700  |
| H  | 0.52891800  | -1.83147000 | 5.06865100  |

**I-2a + HOAc (J)**

E= -2184.957925

G= -2185.029703

|   |             |             |             |
|---|-------------|-------------|-------------|
| C | -3.26456400 | 0.06343700  | -0.75762000 |
| C | -1.75389600 | 0.01678000  | 1.02644600  |
| C | -4.35801400 | -0.00265600 | 1.16113900  |
| C | -5.22721300 | 0.03037600  | 0.08040200  |
| N | -3.08962000 | 0.01591700  | 0.61035300  |
| C | -0.83341200 | 0.06794300  | 0.01694000  |
| N | -4.52467700 | 0.07307900  | -1.11733800 |
| C | -6.69636800 | 0.02626200  | 0.09153000  |
| C | -7.42642100 | -0.01089600 | 1.29215600  |
| C | -7.40455300 | 0.06232100  | -1.12139700 |

|    |              |             |             |
|----|--------------|-------------|-------------|
| C  | -8.81936200  | -0.01178400 | 1.28009800  |
| H  | -6.90374500  | -0.03827500 | 2.24434600  |
| C  | -8.79789400  | 0.06129800  | -1.13047200 |
| H  | -6.84123900  | 0.09201600  | -2.04754600 |
| C  | -9.51354900  | 0.02429600  | 0.06824900  |
| H  | -9.36466100  | -0.04024400 | 2.21957700  |
| H  | -9.32772300  | 0.09022500  | -2.07879800 |
| H  | -10.59977700 | 0.02405900  | 0.05960700  |
| H  | -0.63552900  | 1.95586600  | 0.64402000  |
| H  | 2.15749000   | -4.07533700 | 1.54403300  |
| C  | 2.15645600   | -2.98157000 | 1.58575900  |
| P  | 1.31968100   | -2.28280200 | 0.10193000  |
| H  | 3.18351400   | -2.61483300 | 1.63341700  |
| H  | 1.62952200   | -2.65925100 | 2.48767100  |
| Pd | 1.28083500   | -0.02566400 | 0.01388200  |
| C  | -0.30561100  | -3.14469500 | 0.09661600  |
| C  | 2.19919300   | -3.06777600 | -1.31254400 |
| C  | 3.34267500   | -0.06222800 | 0.01420700  |
| O  | 1.54656200   | 2.15048000  | -0.17145200 |
| H  | -0.87245600  | -2.85371900 | -0.79050000 |
| H  | -0.88361700  | -2.85313900 | 0.97538300  |
| H  | -0.15489600  | -4.22879700 | 0.09810500  |
| H  | 2.20606000   | -4.15669500 | -1.20063600 |
| H  | 1.69089900   | -2.80840700 | -2.24498500 |
| H  | 3.22414800   | -2.69564800 | -1.36055400 |
| C  | 4.06566000   | 0.00945400  | -1.19274900 |
| C  | 4.07581900   | 0.00897600  | 1.21496100  |
| C  | 0.80930900   | 3.08334700  | 0.16902800  |
| C  | 5.45301500   | 0.14959800  | -1.21121500 |
| H  | 3.53879800   | -0.03227900 | -2.14318400 |
| C  | 5.46348000   | 0.15104100  | 1.22273600  |
| H  | 3.55827800   | -0.03543600 | 2.17062800  |
| O  | -0.39668100  | 2.92226800  | 0.67364600  |
| C  | 1.22846000   | 4.51891400  | 0.02761500  |
| H  | 6.01087700   | 0.20987200  | -2.13815600 |
| C  | 6.13592200   | 0.21545500  | 0.00310400  |
| H  | 6.02904700   | 0.21177300  | 2.14496700  |
| H  | -1.54248800  | -0.03319500 | 2.08795600  |
| N  | 7.59519400   | 0.35611600  | -0.00246100 |
| O  | 8.17221700   | 0.41151500  | 1.08541800  |
| O  | 8.16416900   | 0.40979800  | -1.09439100 |
| H  | -4.51890200  | -0.03707800 | 2.22641000  |
| S  | -1.69826700  | 0.11638500  | -1.55015000 |
| H  | 1.06499700   | 5.04792200  | 0.97024700  |
| H  | 0.60331300   | 5.00087300  | -0.73074100 |
| H  | 2.27551000   | 4.57450700  | -0.26596000 |

**I-3a + HOAc (K)**

E= -2184.959132

G= -2185.031156

|   |            |             |             |
|---|------------|-------------|-------------|
| C | 3.41969900 | -1.60122300 | -0.07503000 |
|---|------------|-------------|-------------|

|    |             |             |             |
|----|-------------|-------------|-------------|
| C  | 1.03560900  | -1.62273100 | -0.04001900 |
| C  | 2.60136000  | 0.43851400  | 0.13107800  |
| C  | 3.98719900  | 0.44829000  | 0.09997200  |
| N  | 2.23513900  | -0.89253200 | 0.01680000  |
| C  | 1.34870300  | -2.94809500 | -0.15590800 |
| N  | 4.48647400  | -0.84314000 | -0.03058300 |
| C  | 4.89602000  | 1.59997000  | 0.18374600  |
| C  | 4.41457200  | 2.90913700  | 0.35767600  |
| C  | 6.28394400  | 1.40421700  | 0.08900600  |
| C  | 5.29265800  | 3.98797100  | 0.43161100  |
| H  | 3.34575800  | 3.08736900  | 0.44033200  |
| C  | 7.16011200  | 2.48521200  | 0.16363600  |
| H  | 6.65518000  | 0.39383600  | -0.04245500 |
| C  | 6.67112300  | 3.78218000  | 0.33440200  |
| H  | 4.90004000  | 4.99204700  | 0.56747900  |
| H  | 8.23051300  | 2.31372600  | 0.08840800  |
| H  | 7.35542100  | 4.62376500  | 0.39281000  |
| H  | 0.65248000  | -3.76990500 | -0.25707500 |
| H  | -2.02738600 | -1.31478600 | -4.26030500 |
| C  | -2.07892200 | -1.47991100 | -3.17950500 |
| P  | -0.82707200 | -0.44729500 | -2.31028600 |
| H  | -1.89267900 | -2.53626100 | -2.96942000 |
| H  | -3.07639300 | -1.22216400 | -2.81798600 |
| Pd | -0.85548900 | -0.67290800 | -0.06113800 |
| C  | -1.16033500 | 1.25625500  | -2.92373400 |
| C  | 0.74910100  | -0.87730200 | -3.15622300 |
| C  | -2.72034200 | 0.20848600  | -0.05559600 |
| O  | -1.07492800 | -0.67618500 | 2.12441000  |
| H  | -0.38828100 | 1.93528900  | -2.55223400 |
| H  | -2.12886300 | 1.59924700  | -2.55694300 |
| H  | -1.15122000 | 1.27218900  | -4.01806900 |
| H  | 0.65762400  | -0.71060200 | -4.23417000 |
| H  | 1.55649000  | -0.25634000 | -2.76059000 |
| H  | 0.99985100  | -1.92229100 | -2.96475700 |
| C  | -3.89023100 | -0.57000600 | -0.15702400 |
| C  | -2.87821500 | 1.58343600  | 0.20799100  |
| C  | -0.57434500 | -1.38454800 | 3.00598200  |
| C  | -5.16045300 | -0.01578700 | 0.00259200  |
| H  | -3.81732100 | -1.63768600 | -0.35250700 |
| C  | -4.13674600 | 2.16179900  | 0.36866700  |
| H  | -2.00281600 | 2.22182700  | 0.30224600  |
| O  | 0.30878300  | -2.33612600 | 2.78165900  |
| C  | -0.93047100 | -1.21443500 | 4.45566800  |
| H  | -6.06092600 | -0.61423600 | -0.06850000 |
| C  | -5.26603500 | 1.35014000  | 0.26063600  |
| H  | -4.26006300 | 3.21825800  | 0.57549900  |
| H  | 0.56081100  | -2.34740000 | 1.81981000  |
| N  | -6.59533900 | 1.94728200  | 0.42163300  |
| O  | -6.65926200 | 3.15763200  | 0.64514100  |
| O  | -7.57507600 | 1.20580200  | 0.32313100  |
| H  | 1.86351200  | 1.21738400  | 0.23587800  |
| S  | 3.09552500  | -3.31527900 | -0.21824300 |

|   |             |             |            |
|---|-------------|-------------|------------|
| H | -0.05568400 | -0.84065800 | 4.99731200 |
| H | -1.75620400 | -0.51194600 | 4.55691800 |
| H | -1.19378200 | -2.18267000 | 4.88943200 |

**I-1a + HOAc (L)**

E= -2184.957536

G= -2185.027587

|    |             |             |             |
|----|-------------|-------------|-------------|
| C  | 3.85740900  | -1.38232300 | -0.30994400 |
| C  | 2.16262400  | -2.96256300 | -0.52666500 |
| C  | 1.83509100  | -0.45547400 | 0.09250700  |
| C  | 2.90926200  | 0.44739100  | 0.20926300  |
| N  | 2.50301600  | -1.64404600 | -0.25136600 |
| C  | 3.24075800  | -3.73145500 | -0.79951000 |
| N  | 4.15023800  | -0.13747200 | -0.03990200 |
| C  | 2.85015100  | 1.88537800  | 0.52686600  |
| C  | 1.67364300  | 2.50630800  | 0.98934900  |
| C  | 3.99739800  | 2.68322500  | 0.36170400  |
| C  | 1.64314800  | 3.87396500  | 1.26093400  |
| H  | 0.77883600  | 1.90918000  | 1.14580700  |
| C  | 3.96387500  | 4.04931500  | 0.63497500  |
| H  | 4.91001400  | 2.20842200  | 0.01901500  |
| C  | 2.78755000  | 4.65504300  | 1.08267200  |
| H  | 0.72494800  | 4.32832700  | 1.62428500  |
| H  | 4.86289100  | 4.64435100  | 0.49852500  |
| H  | 2.76403700  | 5.71949300  | 1.29759200  |
| H  | 3.24726300  | -4.78331700 | -1.04286400 |
| H  | -1.15264300 | 0.39527900  | -4.31597900 |
| C  | -1.23479900 | -0.13888200 | -3.36409700 |
| P  | -0.18057000 | 0.66671700  | -2.08545500 |
| H  | -0.90831800 | -1.17246100 | -3.50696300 |
| H  | -2.27499300 | -0.14861200 | -3.03490700 |
| Pd | -0.27698200 | -0.29198700 | -0.03904900 |
| C  | -0.73006700 | 2.42253300  | -2.10054600 |
| C  | 1.46148800  | 0.73869900  | -2.91267200 |
| C  | -2.33315000 | -0.13812900 | -0.12516100 |
| O  | -0.64407800 | -1.24707300 | 1.91122800  |
| H  | -0.07950100 | 3.00704000  | -1.44506400 |
| H  | -1.75513000 | 2.48552400  | -1.73051400 |
| H  | -0.68071500 | 2.82791400  | -3.11607700 |
| H  | 1.35702000  | 1.18632600  | -3.90634200 |
| H  | 2.15171500  | 1.33317600  | -2.31238200 |
| H  | 1.87343200  | -0.26830600 | -3.00986800 |
| C  | -3.12134700 | -1.23946200 | -0.51628700 |
| C  | -3.01095300 | 1.00080900  | 0.35395600  |
| C  | 0.11096400  | -1.29033300 | 2.89376300  |
| C  | -4.51253100 | -1.21905400 | -0.43058000 |
| H  | -2.64330400 | -2.14317000 | -0.88763900 |
| C  | -4.40182600 | 1.04632900  | 0.45102300  |
| H  | -2.44668000 | 1.87384600  | 0.67398500  |
| O  | 1.35833800  | -0.88125900 | 2.88079000  |
| C  | -0.35425900 | -1.81859800 | 4.22219400  |

|    |             |             |             |
|----|-------------|-------------|-------------|
| H  | -5.11813500 | -2.06765000 | -0.72593400 |
| C  | -5.13728800 | -0.06909600 | 0.05257700  |
| H  | -4.92242200 | 1.91968300  | 0.82568700  |
| H  | 1.12532300  | -3.26680200 | -0.50243900 |
| N  | -6.59930400 | -0.03303000 | 0.14284300  |
| O  | -7.12520200 | 0.99597600  | 0.57234800  |
| O  | -7.22358500 | -1.03348400 | -0.21689400 |
| H  | 1.60018800  | -0.59672000 | 1.94347100  |
| S  | 4.76006700  | -2.83140300 | -0.71860800 |
| H  | -1.36258300 | -2.21986800 | 4.13243300  |
| H  | 0.33635900  | -2.58713700 | 4.57925900  |
| H  | -0.34320600 | -1.00463700 | 4.95396500  |
| C  | 5.76695757  | 7.35055642  | 1.92399643  |
| C  | 4.07217257  | 5.77031642  | 1.70727543  |
| C  | 3.74463957  | 8.27740542  | 2.32644743  |
| C  | 4.81881057  | 9.18027042  | 2.44320343  |
| N  | 4.41256457  | 7.08883342  | 1.98257443  |
| C  | 5.15030657  | 5.00142442  | 1.43443043  |
| N  | 6.05978657  | 8.59540742  | 2.19403843  |
| C  | 4.75969957  | 10.61825742 | 2.76080643  |
| C  | 3.58319157  | 11.23918742 | 3.22328943  |
| C  | 5.90694657  | 11.41610442 | 2.59564443  |
| C  | 3.55269657  | 12.60684442 | 3.49487443  |
| H  | 2.68838457  | 10.64205942 | 3.37974743  |
| C  | 5.87342357  | 12.78219442 | 2.86891543  |
| H  | 6.81956257  | 10.94130142 | 2.25295543  |
| C  | 4.69709857  | 13.38792242 | 3.31661243  |
| H  | 2.63449657  | 13.06120642 | 3.85822543  |
| H  | 6.77243957  | 13.37723042 | 2.73246543  |
| H  | 4.67358557  | 14.45237242 | 3.53153243  |
| H  | 5.15681157  | 3.94956242  | 1.19107643  |
| H  | 0.75690557  | 9.12815842  | -2.08203857 |
| C  | 0.67474957  | 8.59399742  | -1.13015657 |
| P  | 1.72897857  | 9.39959642  | 0.14848543  |
| H  | 1.00123057  | 7.56041842  | -1.27302257 |
| H  | -0.36544443 | 8.58426742  | -0.80096657 |
| Pd | 1.63256657  | 8.44089242  | 2.19489143  |
| C  | 1.17948157  | 11.15541242 | 0.13339443  |
| C  | 3.37103657  | 9.47157842  | -0.67873157 |
| C  | -0.42360143 | 8.59475042  | 2.10877943  |
| O  | 1.26547057  | 7.48580642  | 4.14516843  |
| H  | 1.83004757  | 11.73991942 | 0.78887643  |
| H  | 0.15441857  | 11.21840342 | 0.50342643  |
| H  | 1.22883357  | 11.56079342 | -0.88213657 |
| H  | 3.26656857  | 9.91920542  | -1.67240157 |
| H  | 4.06126357  | 10.06605542 | -0.07844157 |
| H  | 3.78298057  | 8.46457342  | -0.77592757 |
| C  | -1.21179843 | 7.49341742  | 1.71765343  |
| C  | -1.10140443 | 9.73368842  | 2.58789643  |
| C  | 2.02051257  | 7.44254642  | 5.12770343  |
| C  | -2.60298243 | 7.51382542  | 1.80336043  |
| H  | -0.73375543 | 6.58970942  | 1.34630143  |

|   |             |             |            |
|---|-------------|-------------|------------|
| C | -2.49227743 | 9.77920842  | 2.68496343 |
| H | -0.53713143 | 10.60672542 | 2.90792543 |
| O | 3.26788657  | 7.85162042  | 5.11473043 |
| C | 1.55528957  | 6.91428142  | 6.45613443 |
| H | -3.20858643 | 6.66522942  | 1.50800643 |
| C | -3.22773943 | 8.66378342  | 2.28651743 |
| H | -3.01287343 | 10.65256242 | 3.05962743 |
| H | 3.03487157  | 5.46607742  | 1.73150143 |
| N | -4.68975543 | 8.69984942  | 2.37678343 |
| O | -5.21565343 | 9.72885542  | 2.80628843 |
| O | -5.31403643 | 7.69939542  | 2.01704643 |
| H | 3.50973657  | 8.13615942  | 4.17741143 |
| S | 6.66961557  | 5.90147642  | 1.51533243 |
| H | 0.54696557  | 6.51301142  | 6.36637343 |
| H | 2.24590757  | 6.14574242  | 6.81319943 |
| H | 1.56634257  | 7.72824242  | 7.18790543 |

### I-2da + HOAc (M)

E= -2224.253155

G= -2224.326593

|    |              |             |             |
|----|--------------|-------------|-------------|
| C  | -3.20683900  | 0.08022900  | -0.83453500 |
| C  | -1.72345800  | 0.17046400  | 0.98901200  |
| C  | -4.32630900  | 0.07805200  | 1.07046300  |
| C  | -5.17987700  | 0.02739100  | -0.02192300 |
| N  | -3.05006400  | 0.10895200  | 0.53558500  |
| C  | -0.79486400  | 0.20156200  | -0.01895100 |
| N  | -4.46099100  | 0.03191100  | -1.21084600 |
| C  | -6.64804300  | -0.02625400 | -0.03016100 |
| C  | -7.39380000  | -0.04498600 | 1.16122700  |
| C  | -7.33937800  | -0.05900100 | -1.25290800 |
| C  | -8.78557900  | -0.09426400 | 1.13081800  |
| H  | -6.88425500  | -0.02095200 | 2.12061000  |
| C  | -8.73160400  | -0.10850700 | -1.28034200 |
| H  | -6.76397400  | -0.04407300 | -2.17195900 |
| C  | -9.46291600  | -0.12629600 | -0.09065800 |
| H  | -9.34317300  | -0.10765200 | 2.06339300  |
| H  | -9.24831500  | -0.13275700 | -2.23600900 |
| H  | -10.54826400 | -0.16447800 | -0.11371300 |
| H  | -0.57053900  | 2.07125000  | 0.32833100  |
| H  | 2.11981500   | -4.07497500 | 1.41105800  |
| C  | 2.17243900   | -2.98323800 | 1.47093200  |
| P  | 1.26805500   | -2.22081100 | 0.05883800  |
| H  | 3.21583900   | -2.66348800 | 1.45430000  |
| H  | 1.72417300   | -2.65609000 | 2.41284400  |
| Pd | 1.32463800   | 0.03868700  | -0.00854800 |
| C  | -0.38773500  | -3.01746800 | 0.15818200  |
| C  | 2.01620200   | -3.01989400 | -1.42192400 |
| C  | 3.38197200   | -0.09067300 | -0.02299800 |
| O  | 1.70633600   | 2.20209300  | -0.14566800 |
| H  | -1.00278800  | -2.69482300 | -0.68441500 |
| H  | -0.88955000  | -2.71744900 | 1.08016000  |

|   |             |             |             |
|---|-------------|-------------|-------------|
| H | -0.28051400 | -4.10666100 | 0.13987700  |
| H | 1.97981000  | -4.10964100 | -1.32556500 |
| H | 1.46204200  | -2.72183300 | -2.31575800 |
| H | 3.05278700  | -2.69545600 | -1.52896400 |
| C | 4.09759800  | -0.06472700 | -1.23604600 |
| C | 4.12691300  | -0.03640300 | 1.17129000  |
| C | 0.94808800  | 3.16227800  | 0.04325200  |
| C | 5.48948400  | 0.01816500  | -1.26667700 |
| H | 3.56207800  | -0.09543200 | -2.18210900 |
| C | 5.51904600  | 0.04795200  | 1.16692900  |
| H | 3.61545600  | -0.04878600 | 2.13118400  |
| O | -0.32592200 | 3.04249600  | 0.34655800  |
| C | 1.42567500  | 4.58236500  | -0.07081400 |
| H | 6.04195700  | 0.04442400  | -2.19843200 |
| C | 6.18408000  | 0.07067500  | -0.05850600 |
| H | 6.09391300  | 0.09606000  | 2.08414200  |
| N | 7.64761400  | 0.15184600  | -0.07657700 |
| O | 8.23502600  | 0.19728800  | 1.00624300  |
| O | 8.20984700  | 0.16884500  | -1.17323800 |
| H | -4.50365000 | 0.09416300  | 2.13320100  |
| S | -1.63275600 | 0.14112200  | -1.60495500 |
| C | -1.47566200 | 0.18605200  | 2.46675100  |
| H | -1.95171700 | 1.04945200  | 2.94867400  |
| H | -1.88028600 | -0.71418700 | 2.94828900  |
| H | -0.40229800 | 0.22933600  | 2.66336500  |
| H | 1.10881300  | 5.15370900  | 0.80548600  |
| H | 0.96213300  | 5.04472500  | -0.94822500 |
| H | 2.50960300  | 4.60462500  | -0.17261600 |

### I-1da + HOAc (N)

E= -2224.25236

G= -2224.32369

|   |            |             |             |
|---|------------|-------------|-------------|
| C | 3.94678600 | -1.06225700 | -0.18435300 |
| C | 2.43275600 | -2.84233900 | -0.25661100 |
| C | 1.83990700 | -0.32346400 | 0.16360100  |
| C | 2.81549100 | 0.69297100  | 0.19762800  |
| N | 2.62853700 | -1.46513600 | -0.09276000 |
| C | 3.60479400 | -3.48512100 | -0.48006500 |
| N | 4.10816900 | 0.22347300  | -0.01617100 |
| C | 2.61323400 | 2.13956700  | 0.40164500  |
| C | 1.37952300 | 2.68125700  | 0.81105500  |
| C | 3.68168700 | 3.02806800  | 0.17819300  |
| C | 1.21760200 | 4.05673400  | 0.97625300  |
| H | 0.54162500 | 2.01690000  | 1.00727000  |
| C | 3.51746200 | 4.40170300  | 0.34539900  |
| H | 4.63821200 | 2.61699000  | -0.12456900 |
| C | 2.28520800 | 4.92647700  | 0.74208400  |
| H | 0.25668600 | 4.44855100  | 1.29978200  |
| H | 4.35806800 | 5.06657300  | 0.16574000  |
| H | 2.15976300 | 5.99727400  | 0.87429100  |
| H | 3.73290400 | -4.54611000 | -0.63619600 |

|    |             |             |             |
|----|-------------|-------------|-------------|
| H  | -1.10519800 | -0.14292000 | -4.35147400 |
| C  | -1.18611300 | -0.55843800 | -3.34206000 |
| P  | -0.18643200 | 0.43952300  | -2.15820500 |
| H  | -0.82040700 | -1.58882000 | -3.35272100 |
| H  | -2.23170700 | -0.56650700 | -3.03020000 |
| Pd | -0.28121500 | -0.26218400 | -0.00997500 |
| C  | -0.80169600 | 2.15658400  | -2.40237000 |
| C  | 1.46744600  | 0.46788200  | -2.96474800 |
| C  | -2.33756500 | -0.15718500 | -0.12831900 |
| O  | -0.64800600 | -0.96845900 | 2.05289700  |
| H  | -0.19834600 | 2.84286400  | -1.80241900 |
| H  | -1.84109300 | 2.22064300  | -2.07370800 |
| H  | -0.73375500 | 2.44049700  | -3.45730900 |
| H  | 1.36945600  | 0.78330500  | -4.00860500 |
| H  | 2.12702300  | 1.15548100  | -2.43330900 |
| H  | 1.91457100  | -0.52820200 | -2.92866000 |
| C  | -3.11226300 | -1.29850900 | -0.41835100 |
| C  | -3.02986600 | 1.01394500  | 0.23999100  |
| C  | 0.10568600  | -0.88625100 | 3.03431000  |
| C  | -4.50409500 | -1.28576100 | -0.33906000 |
| H  | -2.62336700 | -2.22744500 | -0.70292000 |
| C  | -4.42130500 | 1.05264800  | 0.32879200  |
| H  | -2.47526100 | 1.91857200  | 0.47838400  |
| O  | 1.35135300  | -0.47857500 | 2.97106400  |
| C  | -0.35926600 | -1.24854700 | 4.41769500  |
| H  | -5.09918500 | -2.16489300 | -0.55611600 |
| C  | -5.14317300 | -0.10326700 | 0.03387100  |
| H  | -4.95275100 | 1.95115400  | 0.61931700  |
| N  | -6.60573200 | -0.07556200 | 0.11731100  |
| O  | -7.14398000 | 0.98105600  | 0.45450100  |
| O  | -7.21815200 | -1.11030500 | -0.15530000 |
| H  | 1.59049800  | -0.30306000 | 2.00411800  |
| S  | 5.01207600  | -2.41913200 | -0.48607100 |
| C  | 1.07390100  | -3.45888700 | -0.16819500 |
| H  | 0.62702000  | -3.30622500 | 0.82016400  |
| H  | 0.38606300  | -3.01645300 | -0.89746900 |
| H  | 1.13866400  | -4.53324500 | -0.35574100 |
| H  | -1.36763300 | -1.65792900 | 4.37849300  |
| H  | -0.34756500 | -0.35153800 | 5.04481800  |
| H  | 0.33150900  | -1.96778700 | 4.86580000  |

### I-2db + HOAc (O)

E= -2224.253033

G= -2224.326708

|   |             |            |             |
|---|-------------|------------|-------------|
| C | -3.15621400 | 0.08492400 | -0.79799500 |
| C | -1.54875100 | 0.15735600 | 0.91828100  |
| C | -4.14038500 | 0.06231400 | 1.17988200  |
| C | -5.06790400 | 0.02099800 | 0.14906200  |
| N | -2.90443300 | 0.10032900 | 0.55792600  |
| C | -0.69364800 | 0.19765400 | -0.15236100 |
| N | -4.43345100 | 0.03849800 | -1.08681500 |



|    |              |             |             |
|----|--------------|-------------|-------------|
| C  | -6.53307100  | -0.03582700 | 0.24157400  |
| C  | -7.19492500  | -0.08029300 | 1.48091300  |
| C  | -7.30696200  | -0.04654200 | -0.93104900 |
| C  | -8.58548100  | -0.13260100 | 1.54514700  |
| H  | -6.62048000  | -0.07523800 | 2.40321200  |
| C  | -8.69767000  | -0.09931100 | -0.86384100 |
| H  | -6.79582800  | -0.01228600 | -1.88682800 |
| C  | -9.34530400  | -0.14237900 | 0.37280200  |
| H  | -9.07758600  | -0.16639700 | 2.51339600  |
| H  | -9.27885100  | -0.10623100 | -1.78203700 |
| H  | -10.42961300 | -0.18319100 | 0.42385600  |
| H  | -0.43652000  | 2.05961500  | 0.23208200  |
| H  | 2.34088200   | -4.04000000 | 1.10971700  |
| C  | 2.40386400   | -2.94761100 | 1.13879400  |
| P  | 1.37995700   | -2.21329200 | -0.20400700 |
| H  | 3.44333700   | -2.63676400 | 1.02227600  |
| H  | 2.04468800   | -2.59505600 | 2.10915000  |
| Pd | 1.41761900   | 0.04262400  | -0.31906600 |
| C  | -0.25862000  | -3.01276900 | 0.04825700  |
| C  | 1.99872600   | -3.03782300 | -1.72985500 |
| C  | 3.46809100   | -0.07510700 | -0.52850800 |
| O  | 1.76357900   | 2.20777600  | -0.52186300 |
| H  | -0.94479400  | -2.69986900 | -0.74152500 |
| H  | -0.68021500  | -2.70520500 | 1.00727300  |
| H  | -0.15090800  | -4.10206200 | 0.03158000  |
| H  | 1.97999000   | -4.12560600 | -1.60961400 |
| H  | 1.36367900   | -2.76073000 | -2.57534400 |
| H  | 3.01873800   | -2.70914900 | -1.93635100 |
| C  | 4.06869600   | -0.01314200 | -1.80012200 |
| C  | 4.31876900   | -0.03509600 | 0.58584200  |
| C  | 1.03404200   | 3.16095700  | -0.21954400 |
| C  | 5.45597600   | 0.09499200  | -1.96033500 |
| H  | 3.44520200   | -0.03485600 | -2.69161200 |
| C  | 5.70098400   | 0.07188500  | 0.41173600  |
| H  | 3.93625900   | -0.07285700 | 1.59965200  |
| O  | -0.19077900  | 3.03056600  | 0.24200800  |
| C  | 1.49135700   | 4.58527800  | -0.36158000 |
| H  | 5.88494100   | 0.14739300  | -2.95735700 |
| C  | 6.29301000   | 0.13848000  | -0.84808700 |
| H  | -4.24403200  | 0.06895200  | 2.25249700  |
| S  | -1.64000000  | 0.15187900  | -1.67599800 |
| C  | -1.19735100  | 0.15767800  | 2.37503400  |
| H  | -1.63446600  | 1.01788500  | 2.89774500  |
| H  | -1.57062100  | -0.74581000 | 2.87539500  |
| H  | -0.11271800  | 0.19573700  | 2.49607000  |
| H  | 7.36901000   | 0.21999000  | -0.93418000 |
| N  | 6.56678000   | 0.10978400  | 1.60204800  |
| O  | 7.77951000   | 0.23534200  | 1.42777200  |
| O  | 6.03176100   | 0.01010500  | 2.70787100  |
| H  | 2.53979900   | 4.61322500  | -0.65407100 |
| H  | 1.34372800   | 5.11631100  | 0.58277400  |
| H  | 0.87833900   | 5.08611300  | -1.11732000 |

**I-1db + HOAc (P)**

E= -2224.252054

G= -2224.323631

|    |             |             |             |
|----|-------------|-------------|-------------|
| C  | 4.01520000  | -0.37190700 | -0.08028900 |
| C  | 2.94457700  | -2.44977200 | -0.12809000 |
| C  | 1.78485600  | -0.11860300 | 0.17829000  |
| C  | 2.50460100  | 1.09246900  | 0.20497800  |
| N  | 2.81897900  | -1.05971200 | -0.01198600 |
| C  | 4.23828400  | -2.81753200 | -0.29479200 |
| N  | 3.87708600  | 0.92100800  | 0.04605400  |
| C  | 1.97488600  | 2.46102700  | 0.35434400  |
| C  | 0.63805700  | 2.72072300  | 0.71325200  |
| C  | 2.82290800  | 3.56152900  | 0.12956500  |
| C  | 0.16458900  | 4.02779500  | 0.82675400  |
| H  | -0.03577600 | 1.89082600  | 0.91112800  |
| C  | 2.34795200  | 4.86647500  | 0.24562700  |
| H  | 3.85703600  | 3.36925300  | -0.13360000 |
| C  | 1.01648400  | 5.10940300  | 0.59113900  |
| H  | -0.87045800 | 4.20011200  | 1.10995700  |
| H  | 3.02285100  | 5.69910800  | 0.06600800  |
| H  | 0.64844900  | 6.12720300  | 0.68298100  |
| H  | 4.60727600  | -3.82647900 | -0.40569100 |
| H  | -1.01994300 | -0.68436000 | -4.40355800 |
| C  | -1.02144200 | -1.09207300 | -3.38765300 |
| P  | -0.29824500 | 0.12519700  | -2.20711700 |
| H  | -0.42976600 | -2.01147300 | -3.37369700 |
| H  | -2.04278900 | -1.33375000 | -3.08902000 |
| Pd | -0.28426100 | -0.54986700 | -0.04819900 |
| C  | -1.27254900 | 1.65757100  | -2.50261200 |
| C  | 1.32496000  | 0.51249500  | -2.98305800 |
| C  | -2.30892500 | -0.93227900 | -0.21872000 |
| O  | -0.53769500 | -1.28434600 | 2.02042500  |
| H  | -0.84676200 | 2.47246700  | -1.91190300 |
| H  | -2.30691400 | 1.50130600  | -2.19071000 |
| H  | -1.24638600 | 1.92617800  | -3.56352700 |
| H  | 1.18138300  | 0.76773700  | -4.03786600 |
| H  | 1.79166000  | 1.35032700  | -2.46293400 |
| H  | 1.99083700  | -0.34976400 | -2.90510300 |
| C  | -2.79021500 | -2.23990600 | -0.42367600 |
| C  | -3.26385100 | 0.06575000  | 0.02868600  |
| C  | 0.12491800  | -0.97384600 | 3.02176000  |
| C  | -4.15571100 | -2.54700600 | -0.37589100 |
| H  | -2.08673800 | -3.04764000 | -0.61576100 |
| C  | -4.62371200 | -0.25284500 | 0.07293900  |
| H  | -2.97875900 | 1.09728800  | 0.20184700  |
| O  | 1.23268300  | -0.27164700 | 2.98063200  |
| C  | -0.30717600 | -1.37222700 | 4.40590100  |
| H  | -4.48868200 | -3.56943300 | -0.53352200 |
| C  | -5.09462400 | -1.54900200 | -0.12607700 |
| H  | 1.46569900  | -0.08122100 | 2.01549400  |

|   |             |             |             |
|---|-------------|-------------|-------------|
| S | 5.36880800  | -1.46129300 | -0.30236400 |
| C | 1.75792500  | -3.35514700 | -0.04796400 |
| H | 1.25874900  | -3.27564100 | 0.92377000  |
| H | 1.01055600  | -3.10274000 | -0.80837400 |
| H | 2.06920600  | -4.39227900 | -0.19353900 |
| H | -6.15775300 | -1.74844700 | -0.08455300 |
| N | -5.59850800 | 0.81957700  | 0.33234600  |
| O | -6.78996800 | 0.51241500  | 0.39223800  |
| O | -5.17088300 | 1.96701900  | 0.47188800  |
| H | -0.65612900 | -0.47997300 | 4.93622300  |
| H | 0.54061600  | -1.77538800 | 4.96489000  |
| H | -1.11666400 | -2.09881600 | 4.34994700  |

**4.  $^1\text{H}$  and  $^{13}\text{C}$  NMR spectra**  
**6-Phenylimidazo[2,1-b]thiazole (1a)<sup>7</sup>**

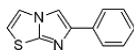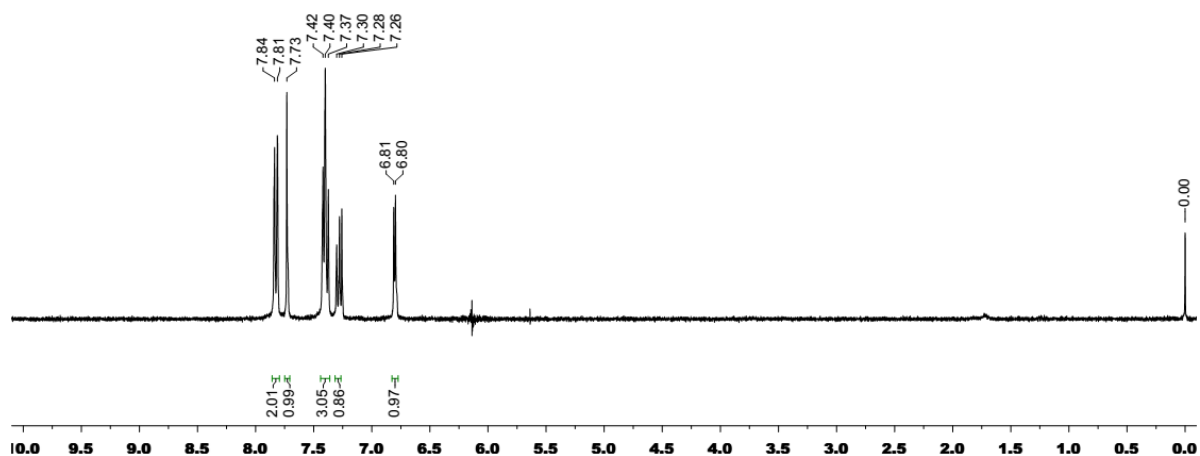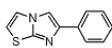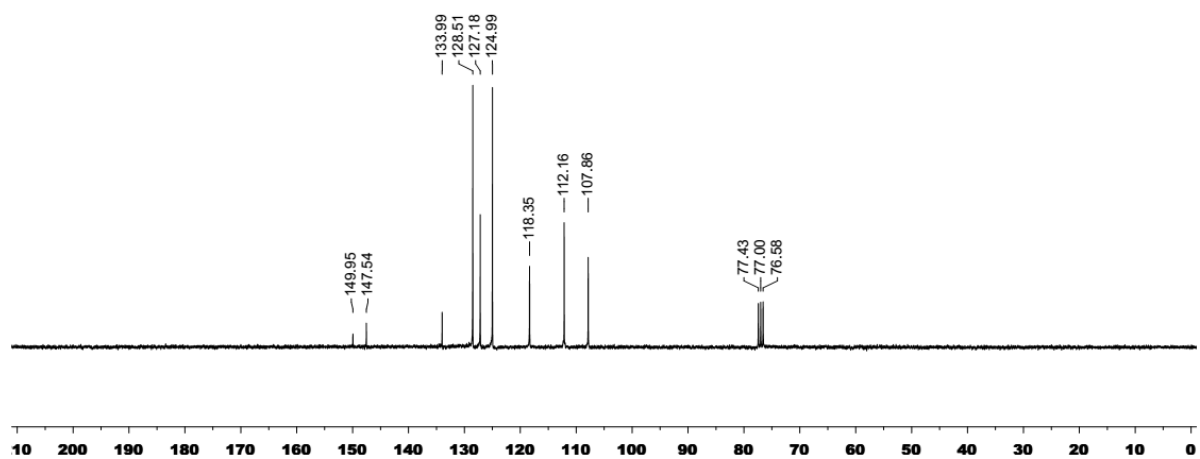

2-Phenylbenzo[d]imidazo[2,1-b]thiazole (1b)<sup>8</sup>

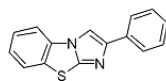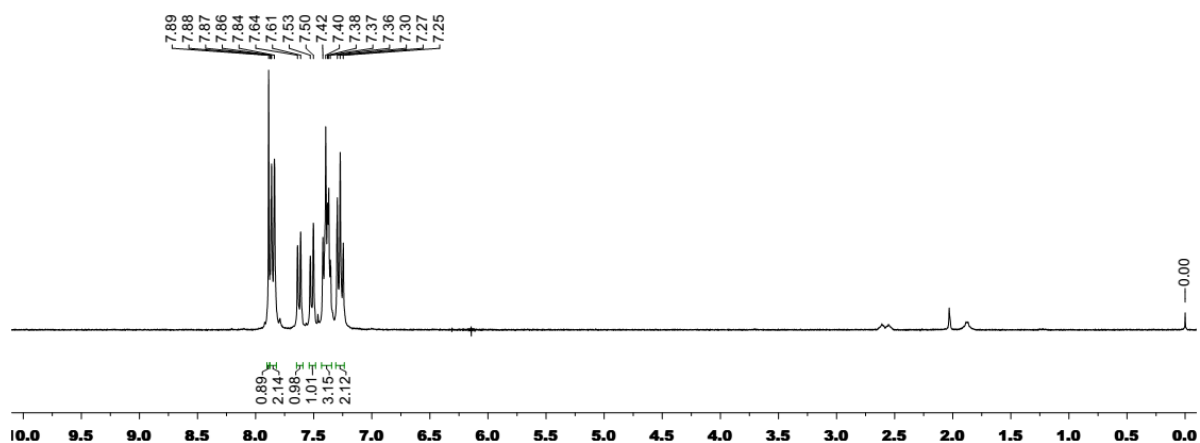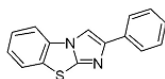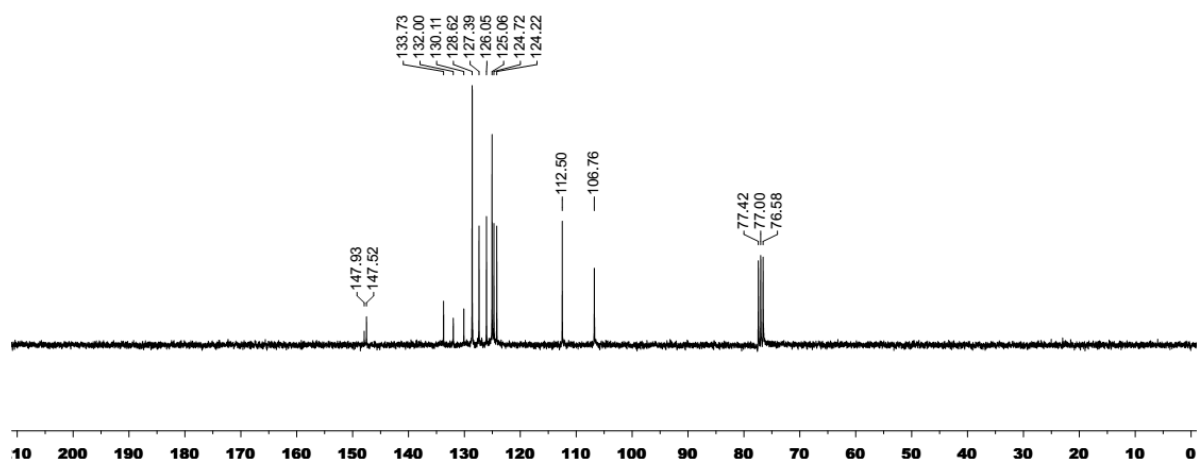

2-Phenyl-5,6,7,8-tetrahydrobenzo[d]imidazo[2,1-b]thiazole (1c)<sup>9</sup>

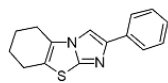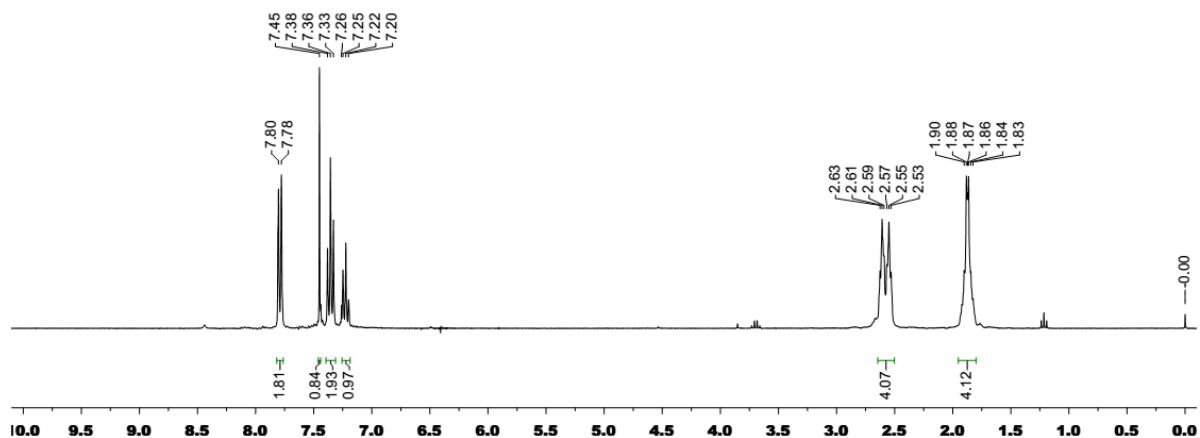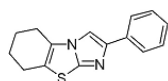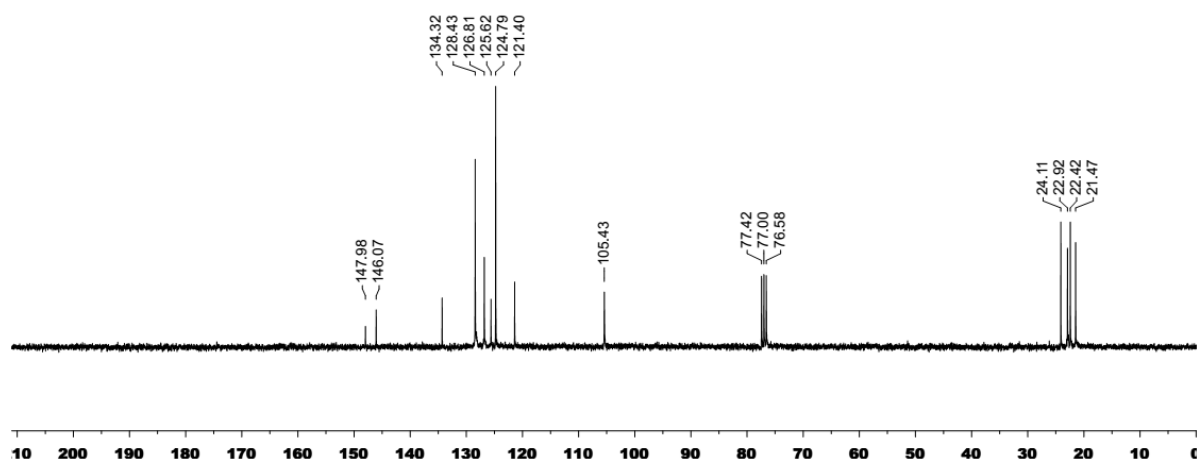

3-Methyl-6-phenylimidazo[2,1b]thiazole (1d)<sup>10</sup>

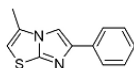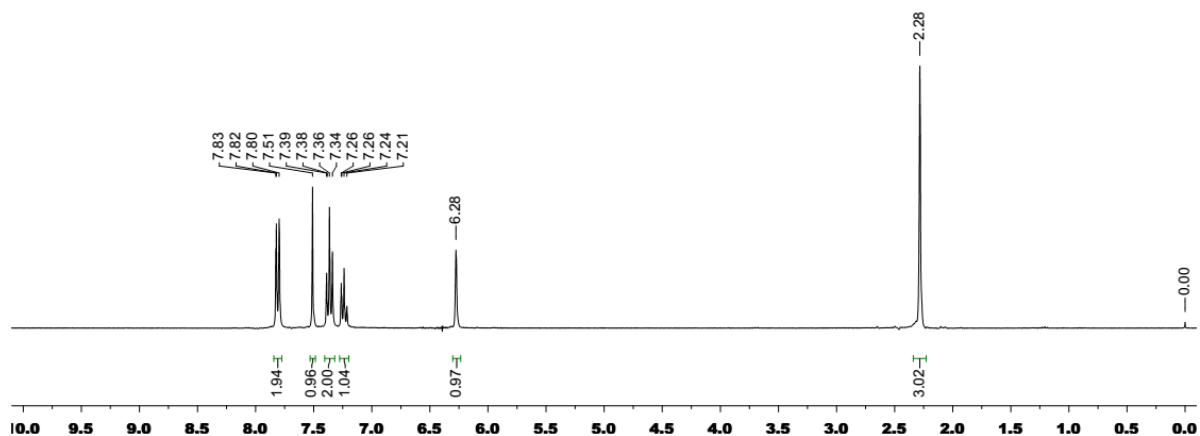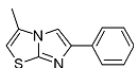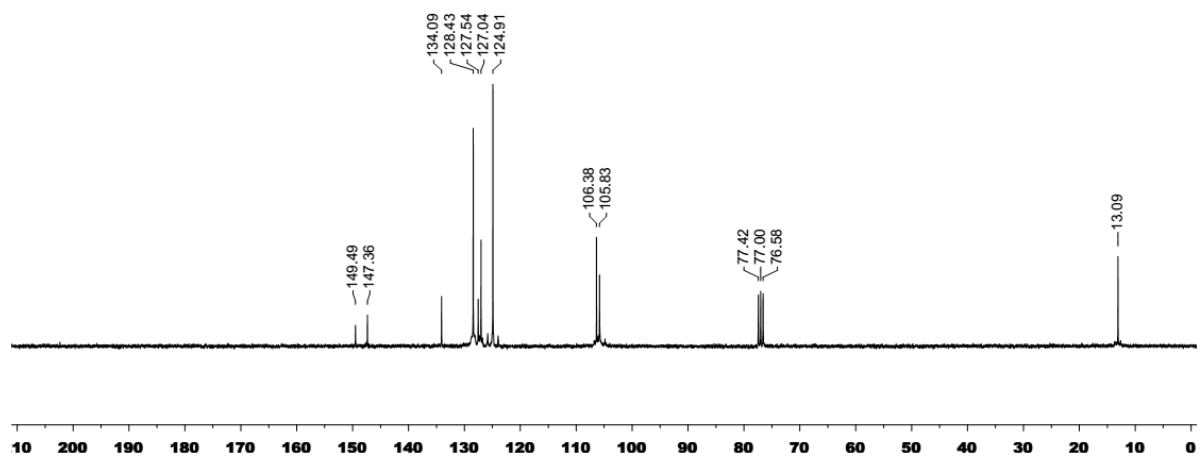

5-(4-Nitrophenyl)-6-phenylimidazo[2,1-b]thiazole (3aa)

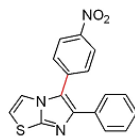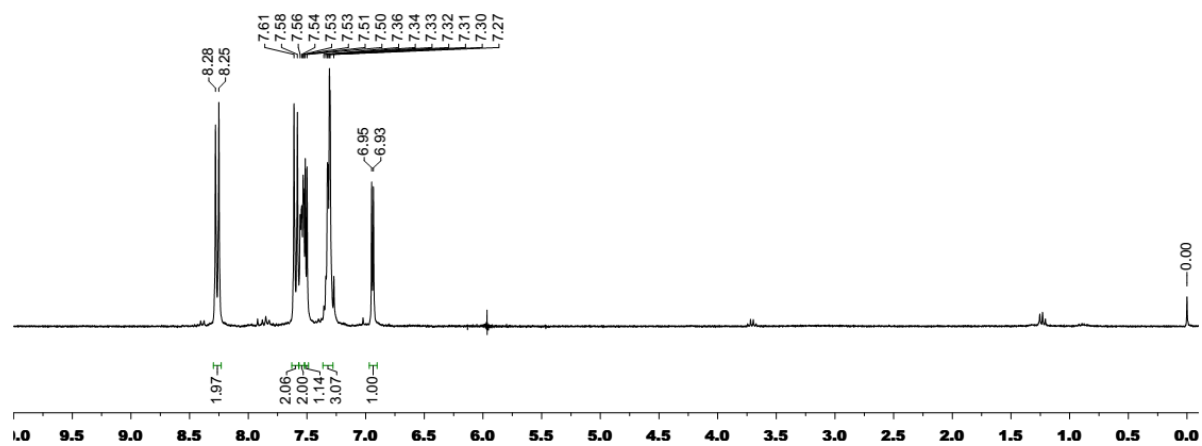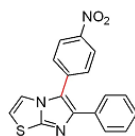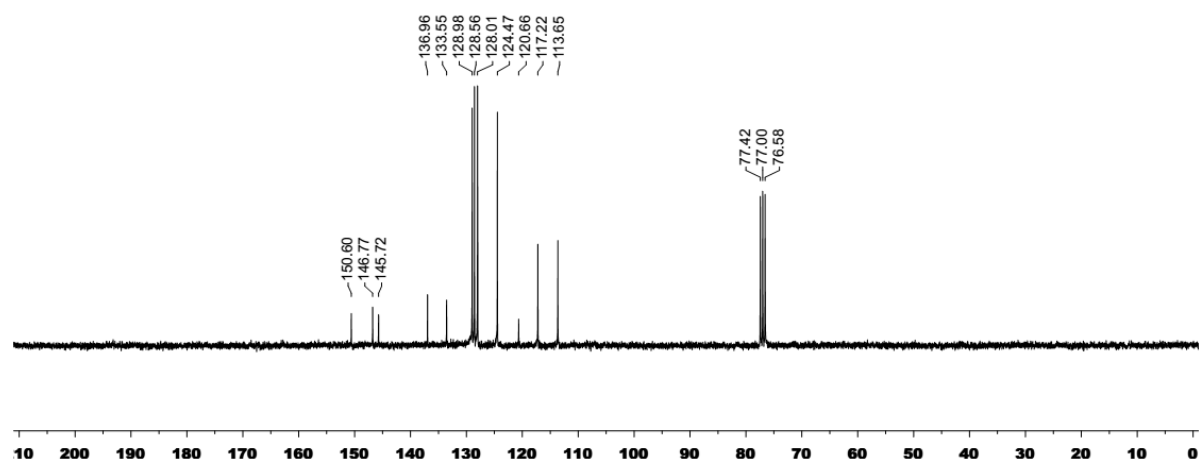

5-(3-Nitrophenyl)-6-phenylimidazo[2,1-b]thiazole (3ab)



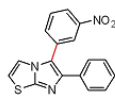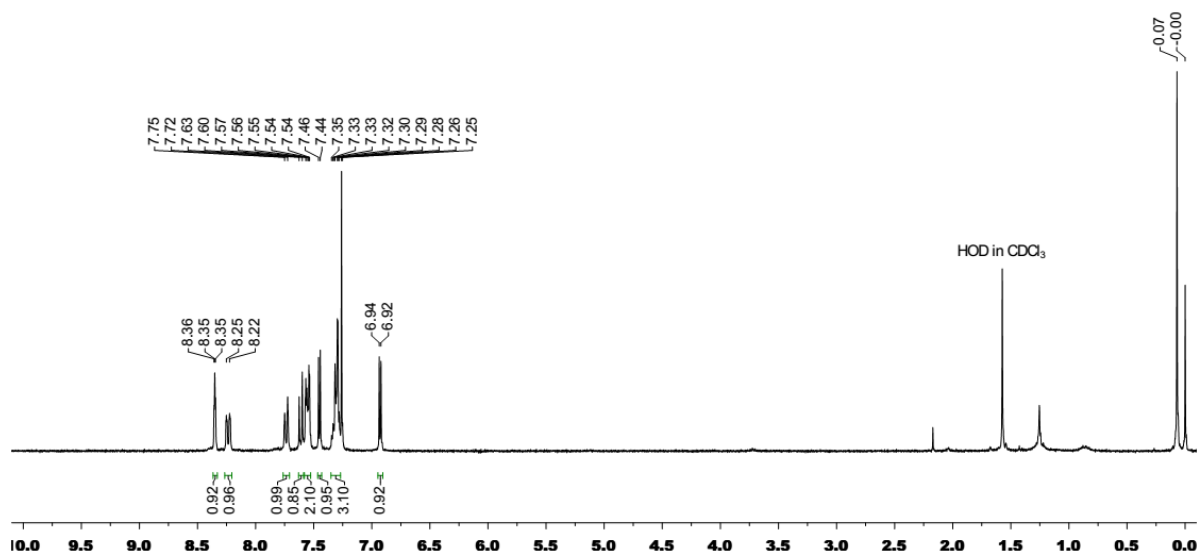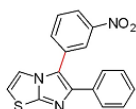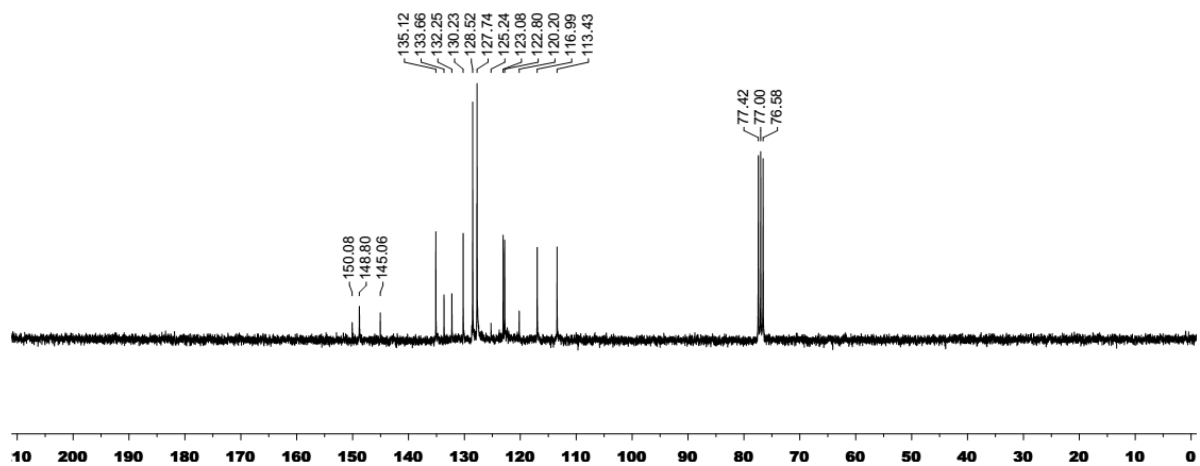

5-(2-Nitrophenyl)-6-phenylimidazo[2,1-b]thiazole (3ac)

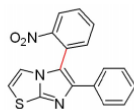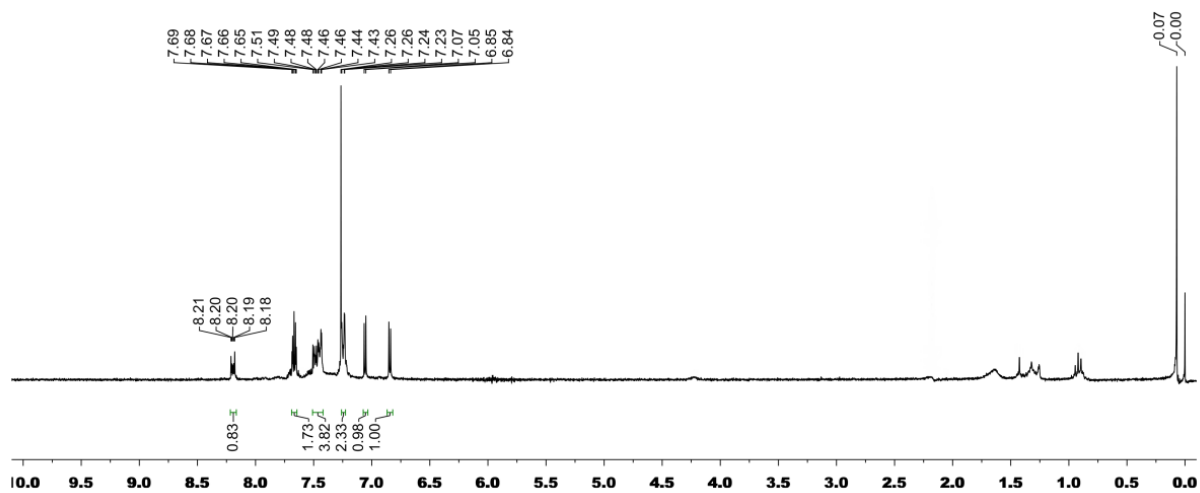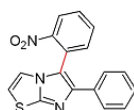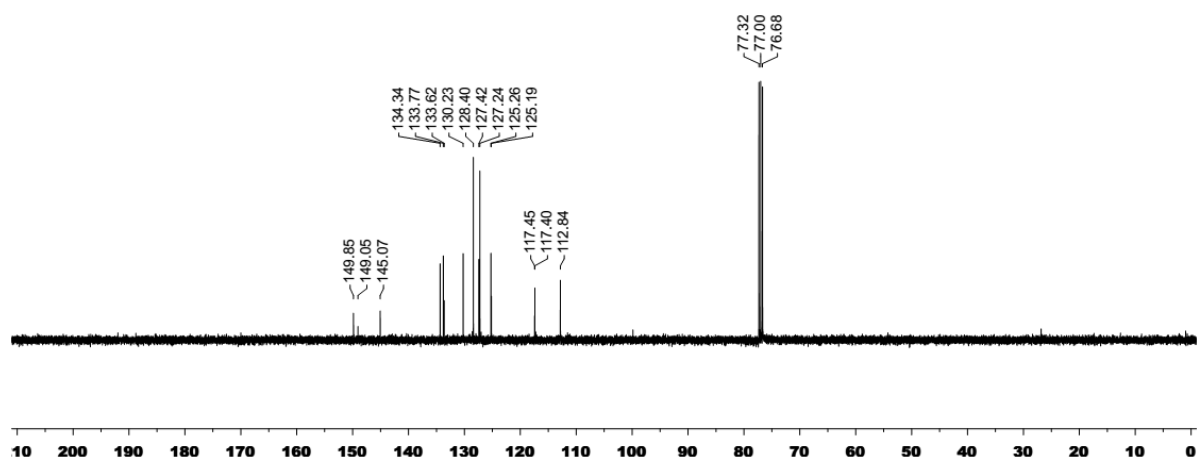

4-(6-Phenylimidazo[2,1-b]thiazol-5-yl)benzonitrile (3ad)

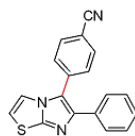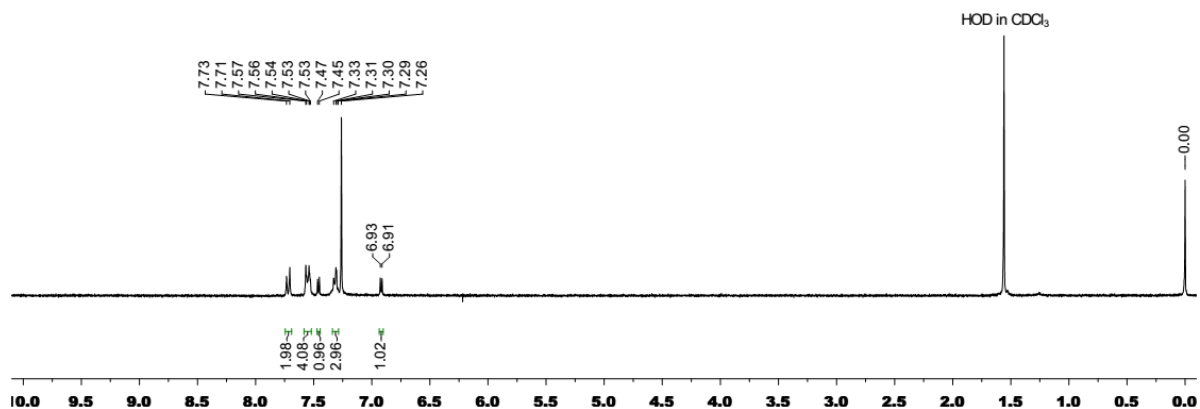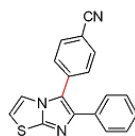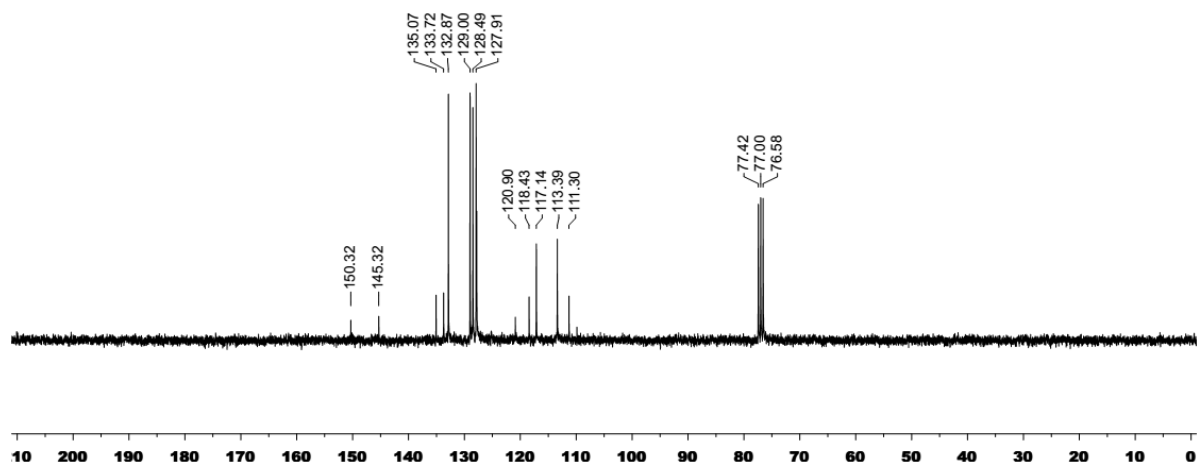

6-Phenyl-5-(4-(trifluoromethyl)phenyl)imidazo[2,1-b]thiazole (3ae)

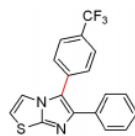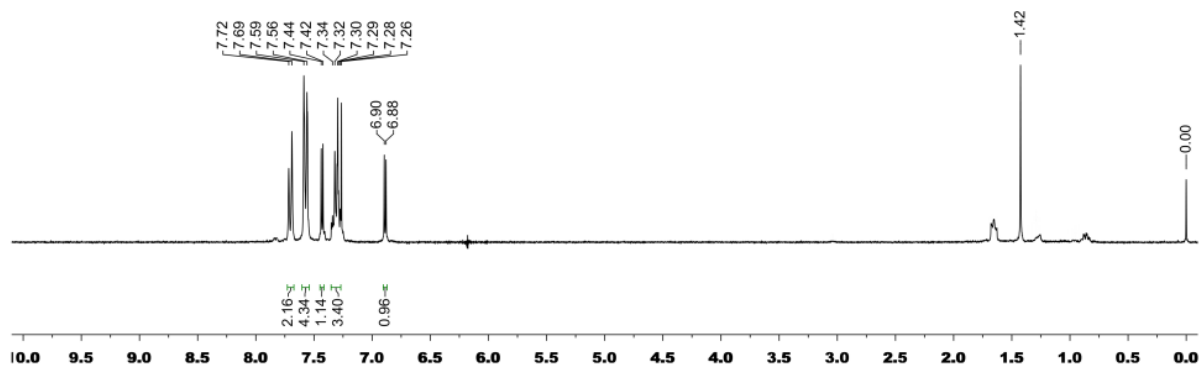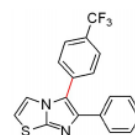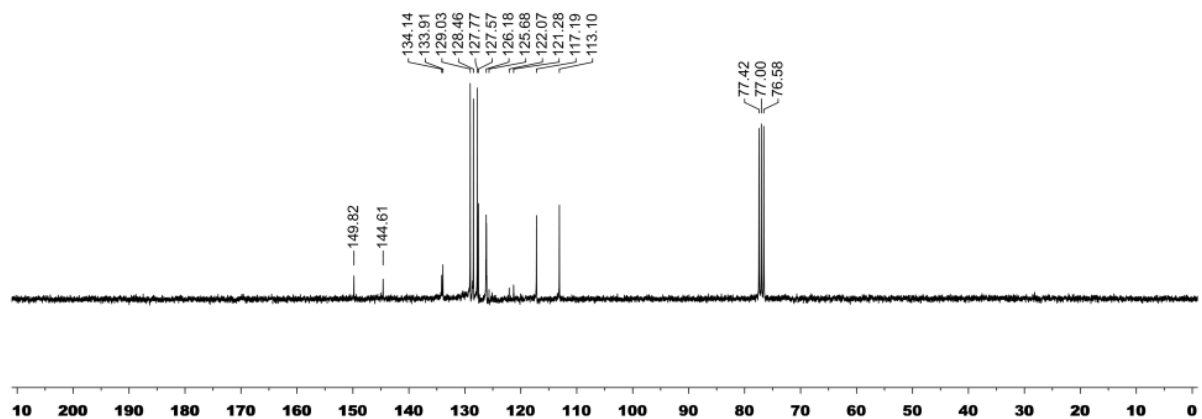

1-(4-(6-Phenylimidazo[2,1-b]thiazol-5-yl)phenyl)ethanone (3af)

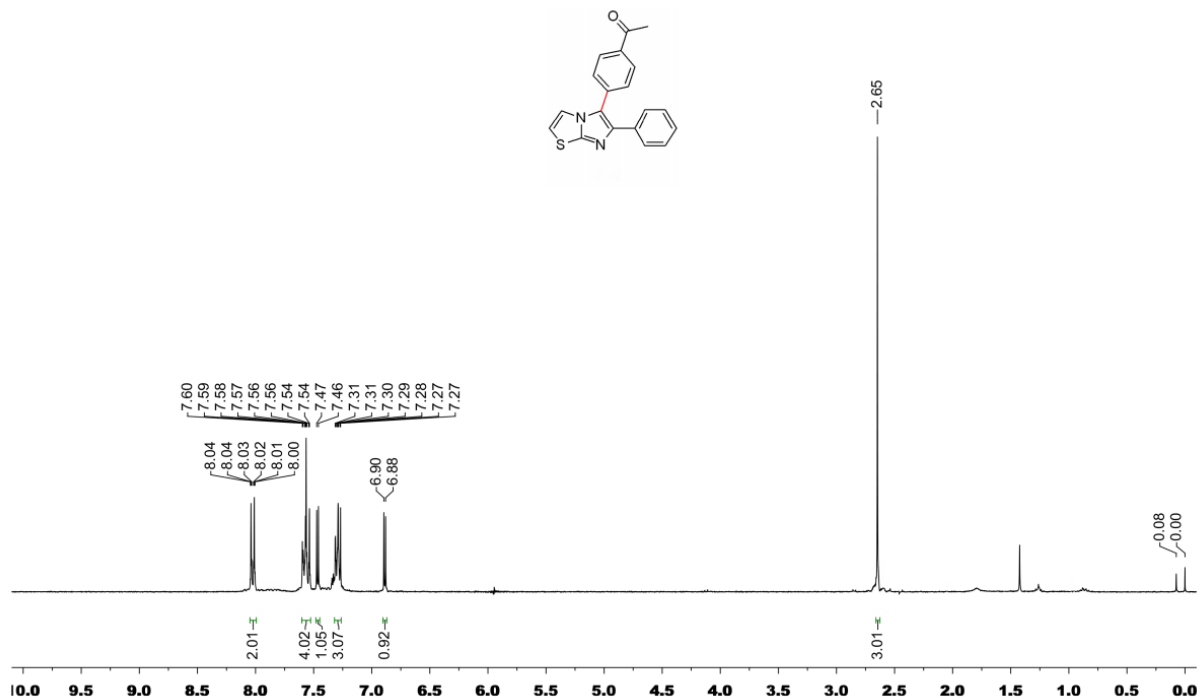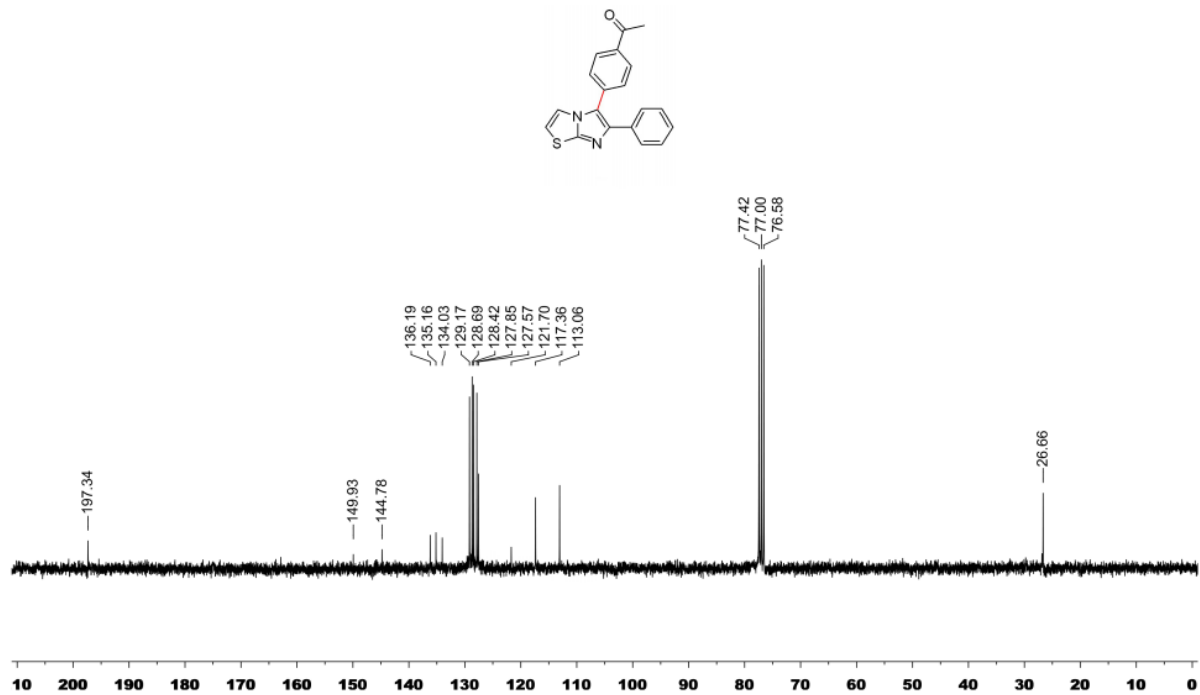

Methyl 4-(6-phenylimidazo[2,1-b]thiazol-5-yl)benzoate(3ag)

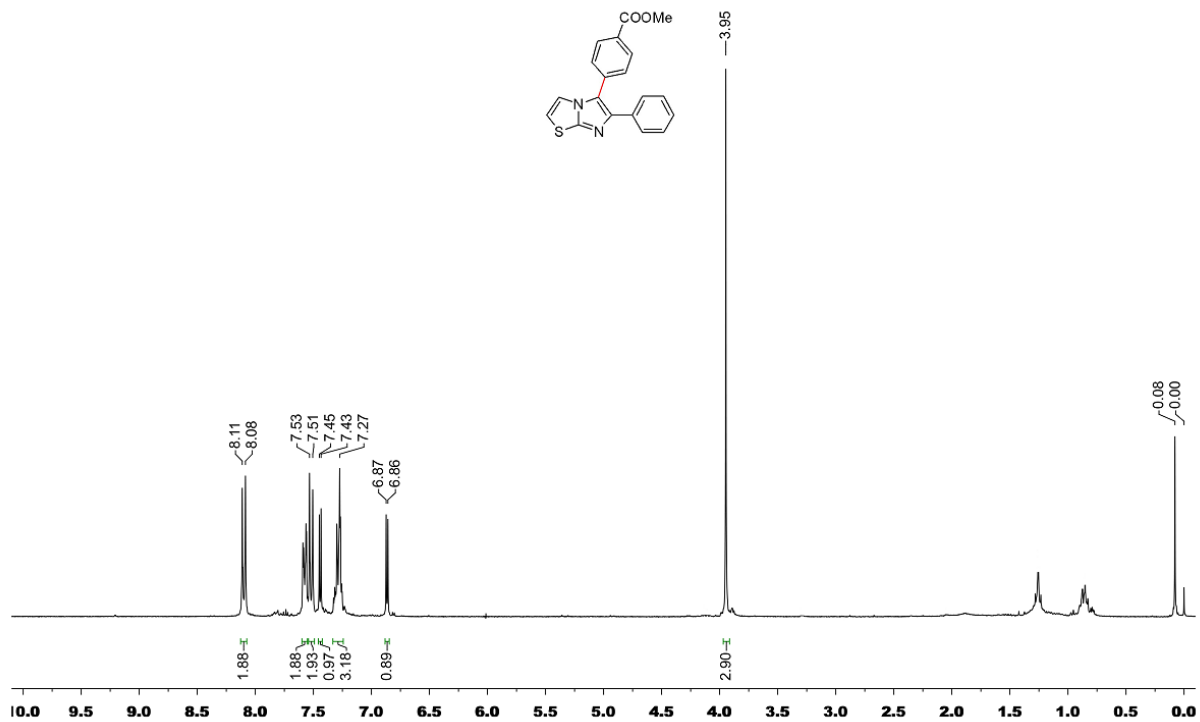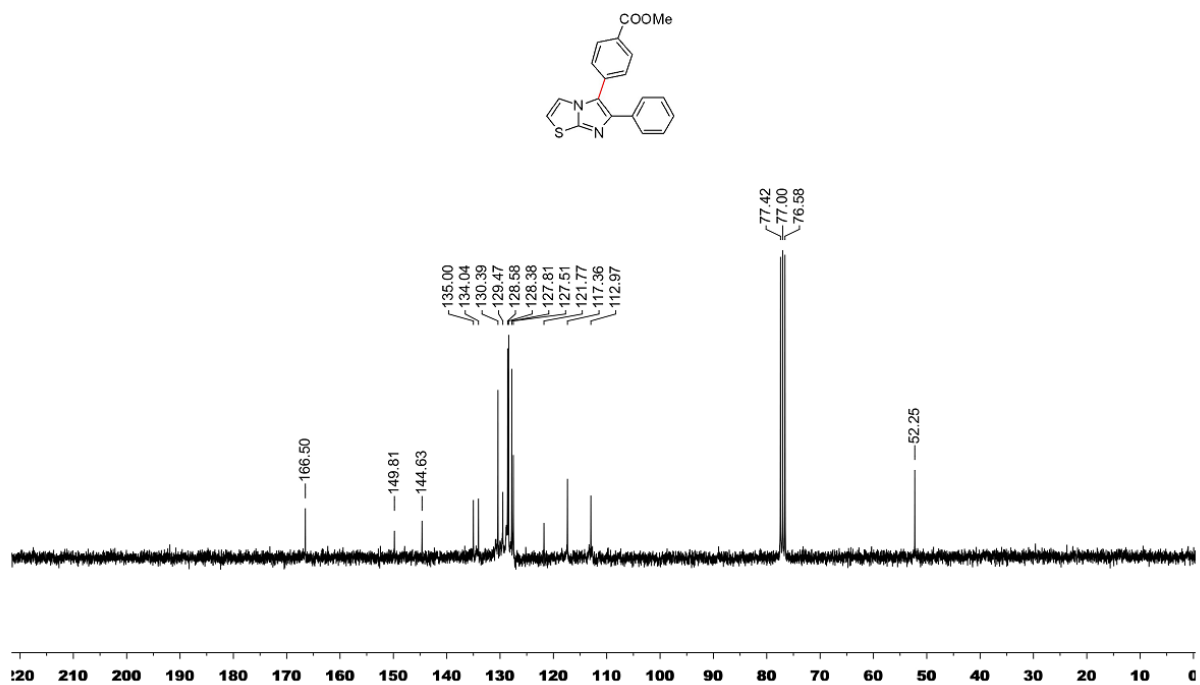

6-Phenyl-5-(p-tolyl)imidazo[2,1-b]thiazole (3ah)

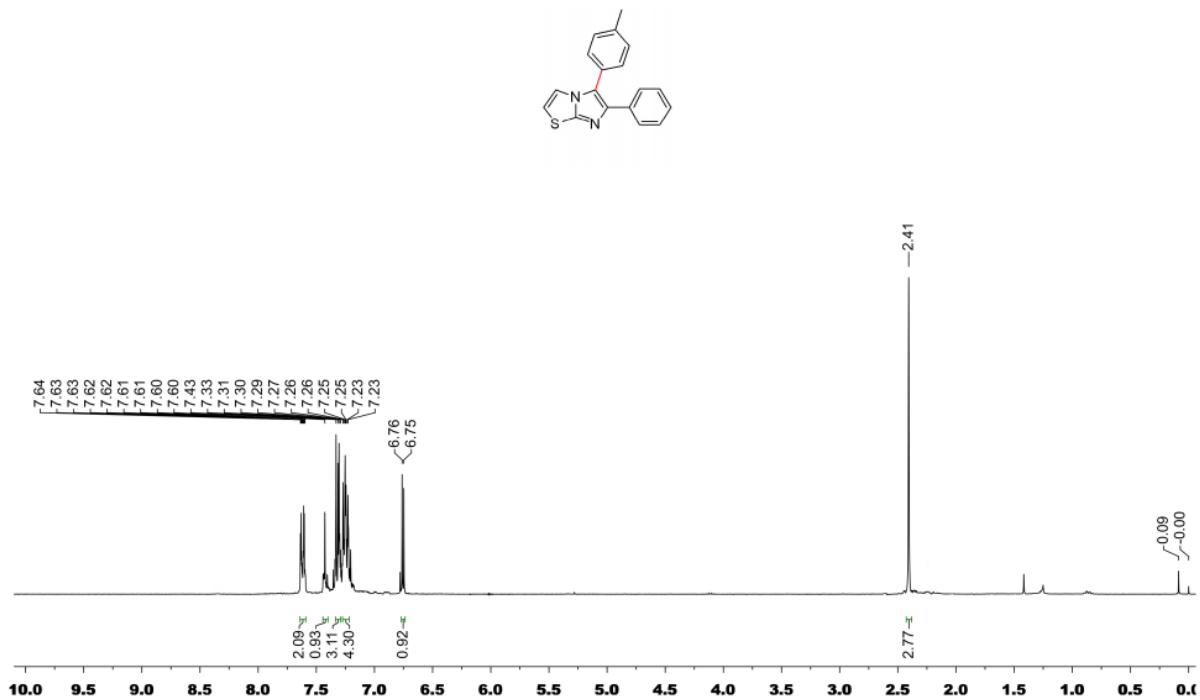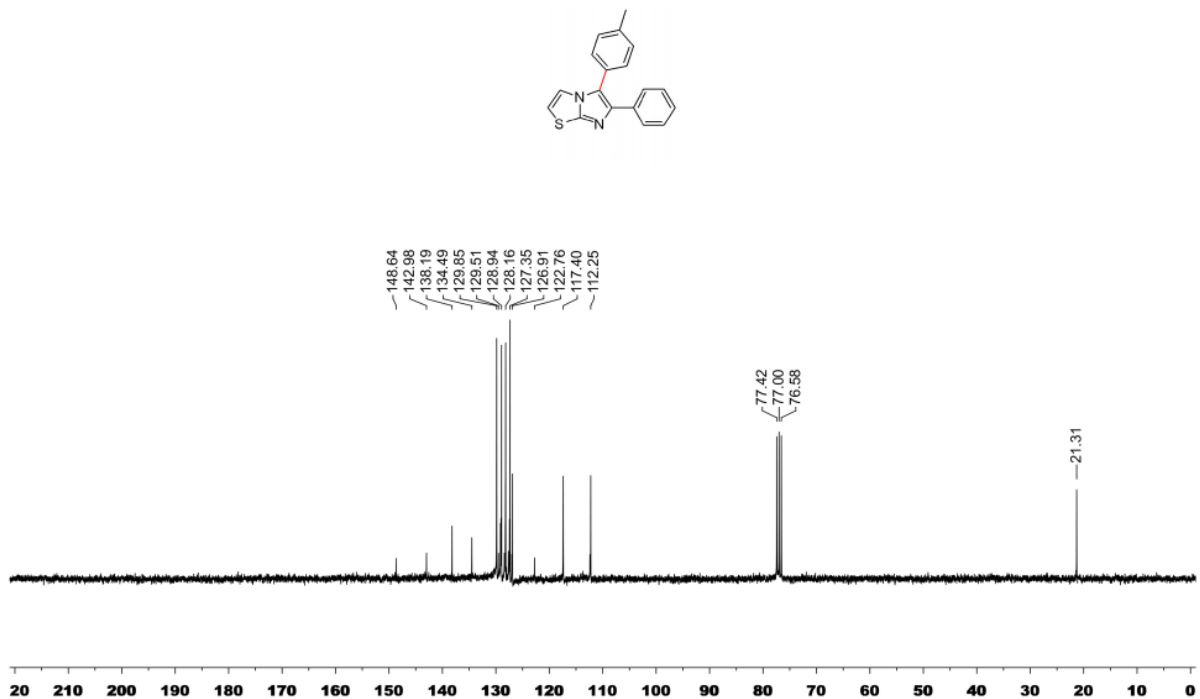

**5-(3,5-Bis(trifluoromethyl)phenyl)-6-phenylimidazo[2,1-b]thiazole (3ai)**

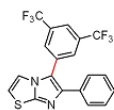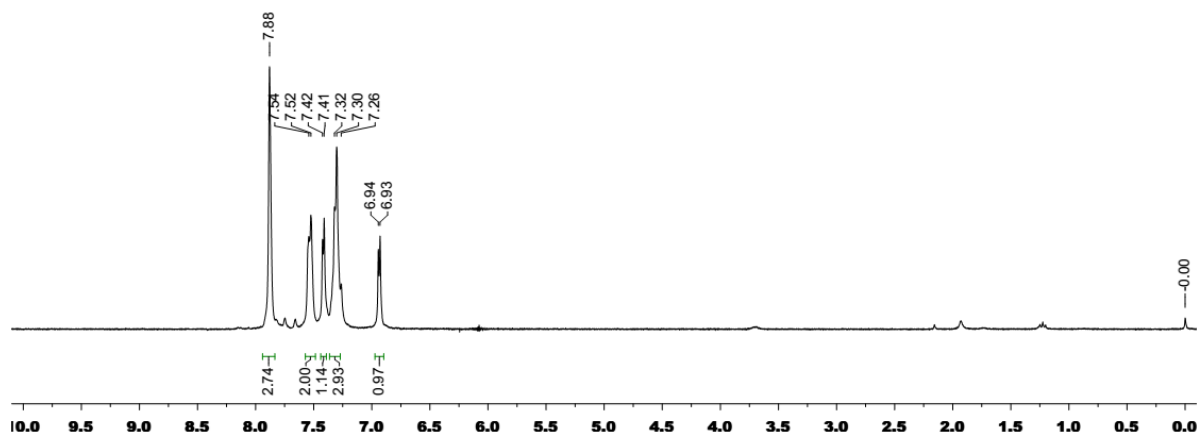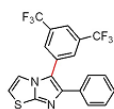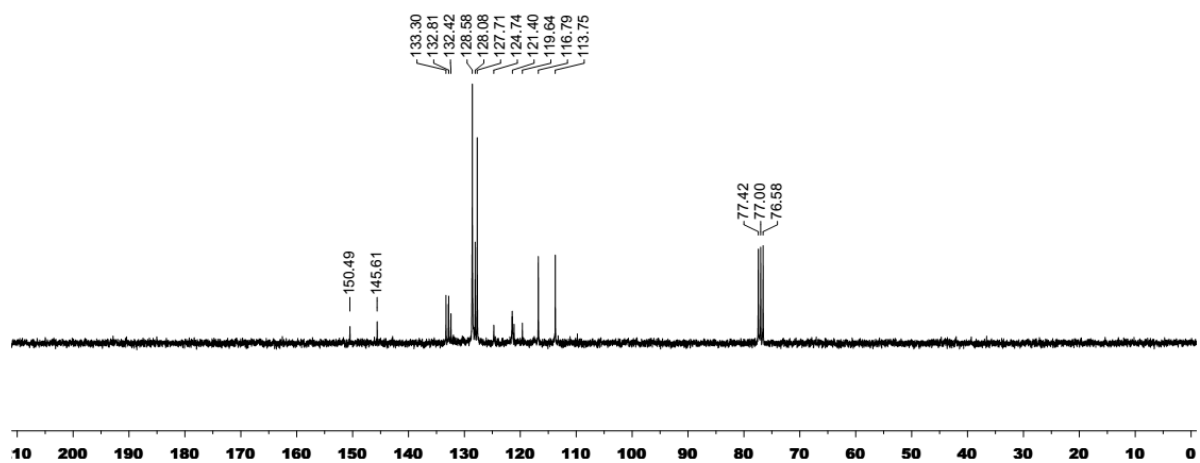

5-(4-Nitro-3-(trifluoromethyl)phenyl)-6-phenylimidazo[2,1-b]thiazole (3aj)



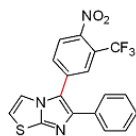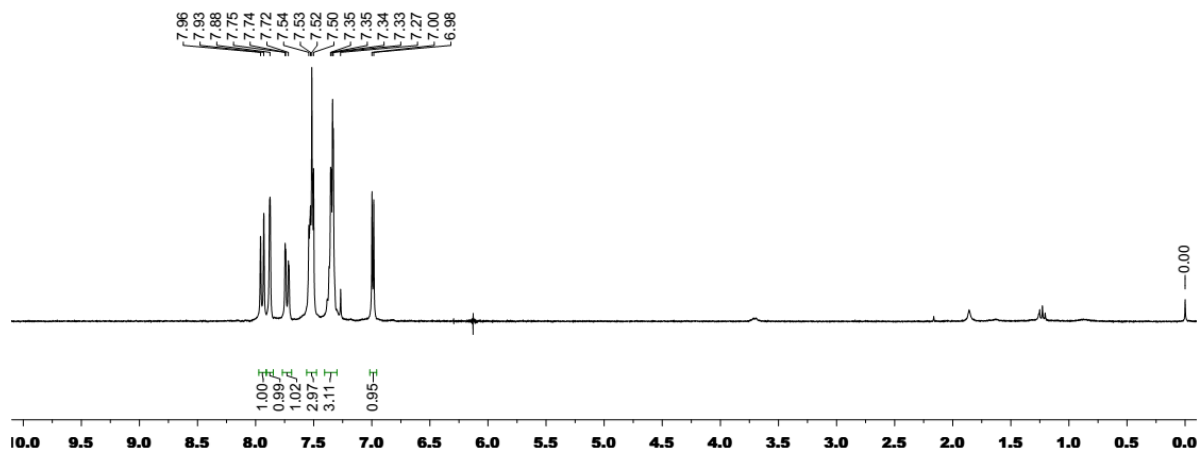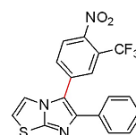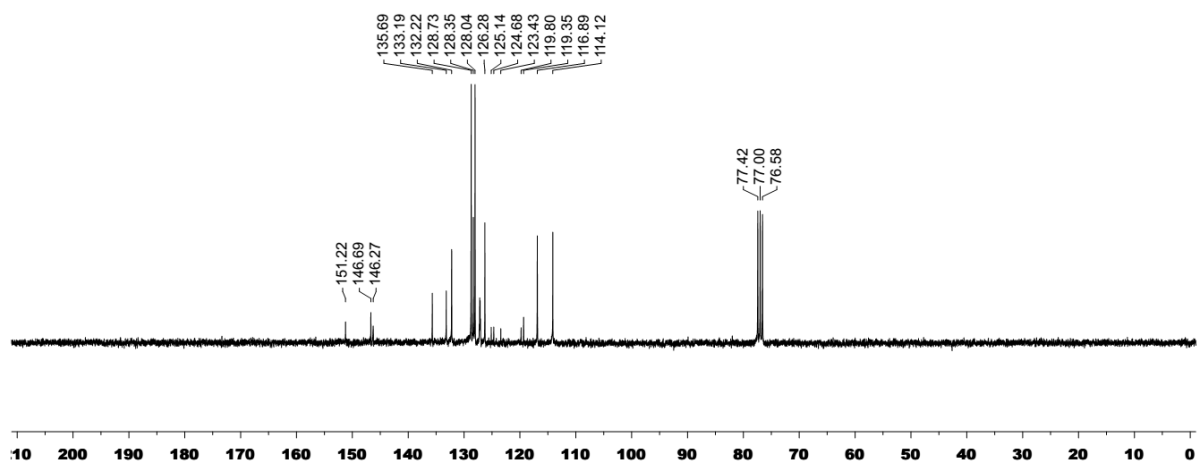

3-(4-Nitrophenyl)-2-phenylbenzo[d]imidazo[2,1-b]thiazole (3ba)

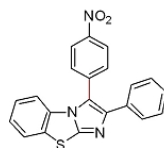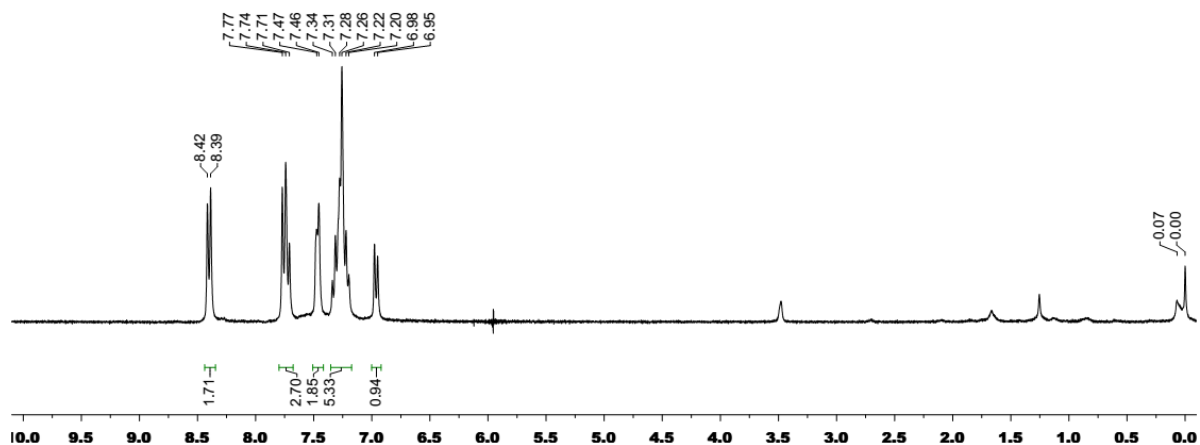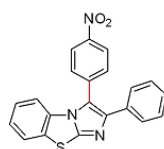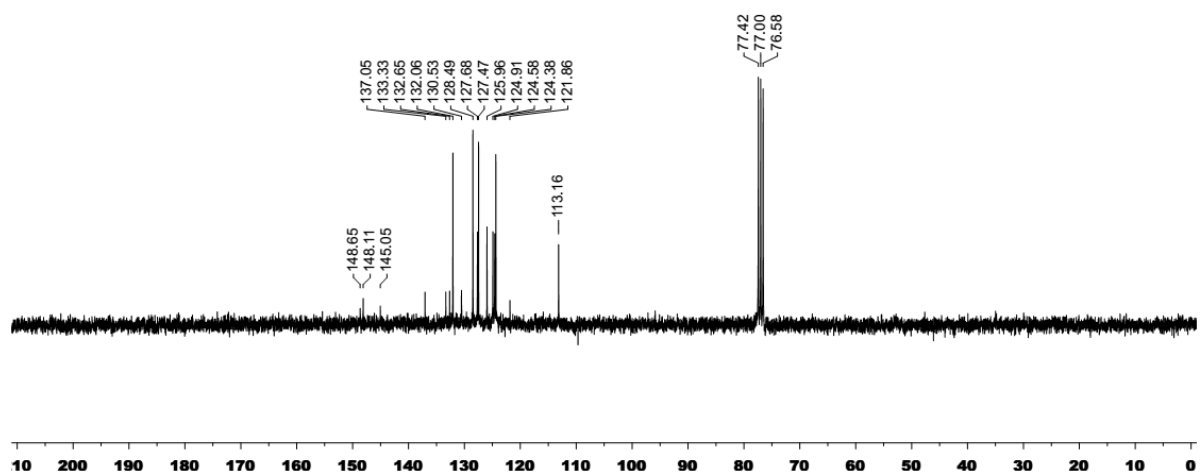

3-(3-Nitrophenyl)-2-phenylbenzo[d]imidazo[2,1-b]thiazole (3bb)

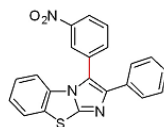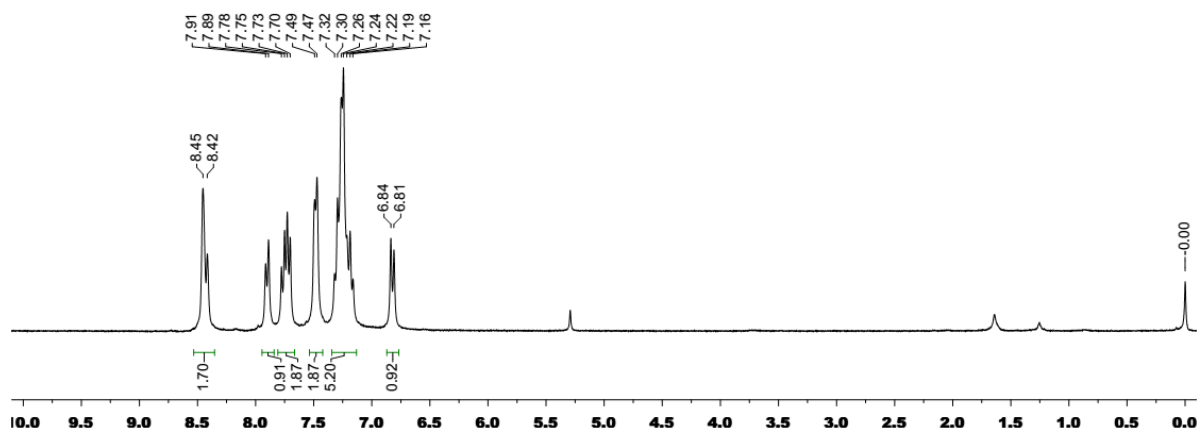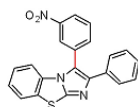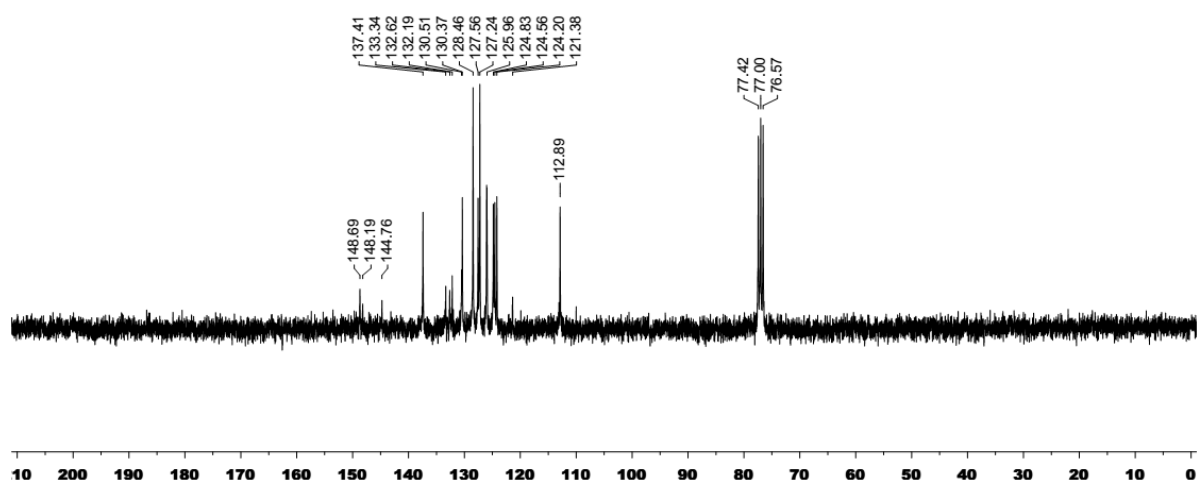

4-(2-Phenylbenzo[d]imidazo[2,1-b]thiazol-3-yl)benzonitrile (3bc)

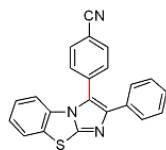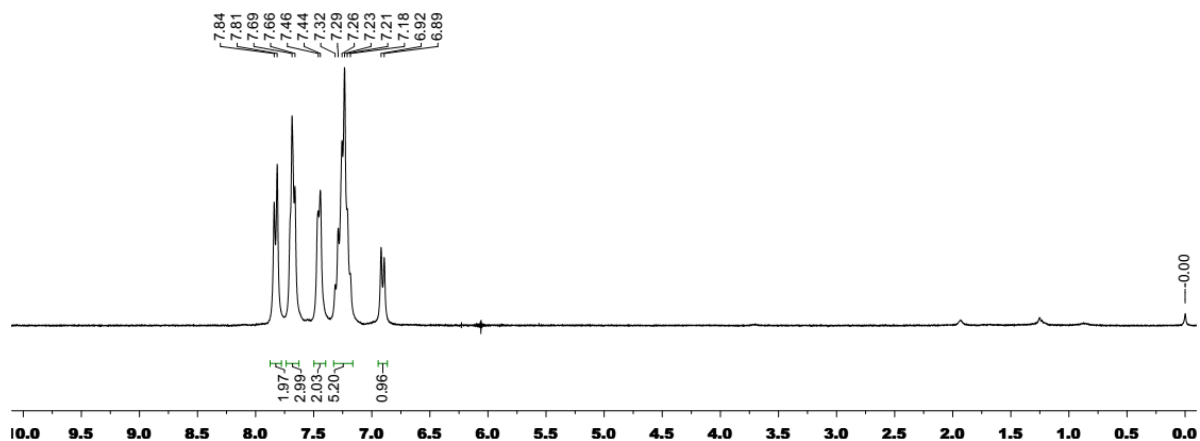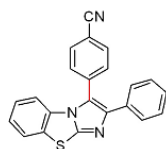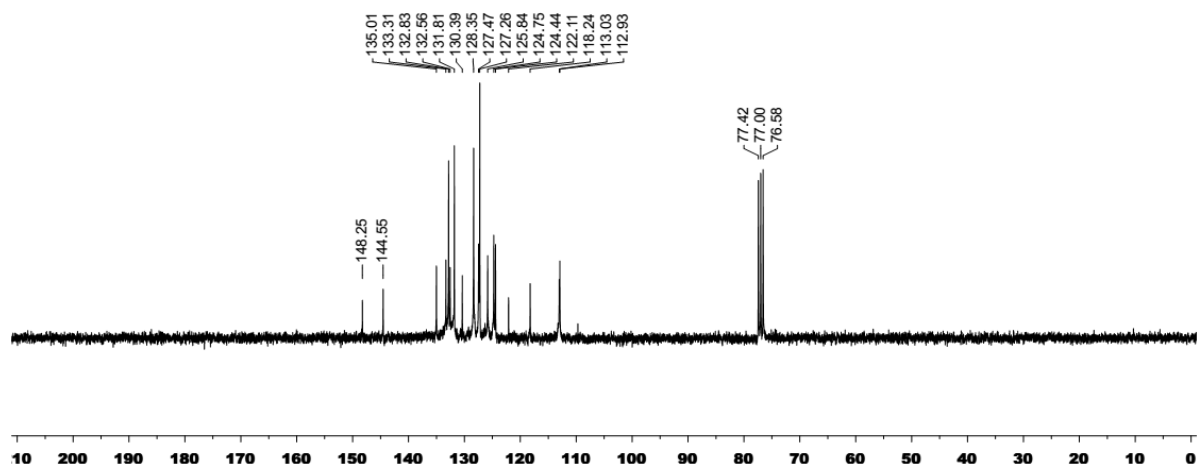

2-Phenyl-3-(4-(trifluoromethyl)phenyl)benzo[d]imidazo[2,1-b]thiazole (3bd)

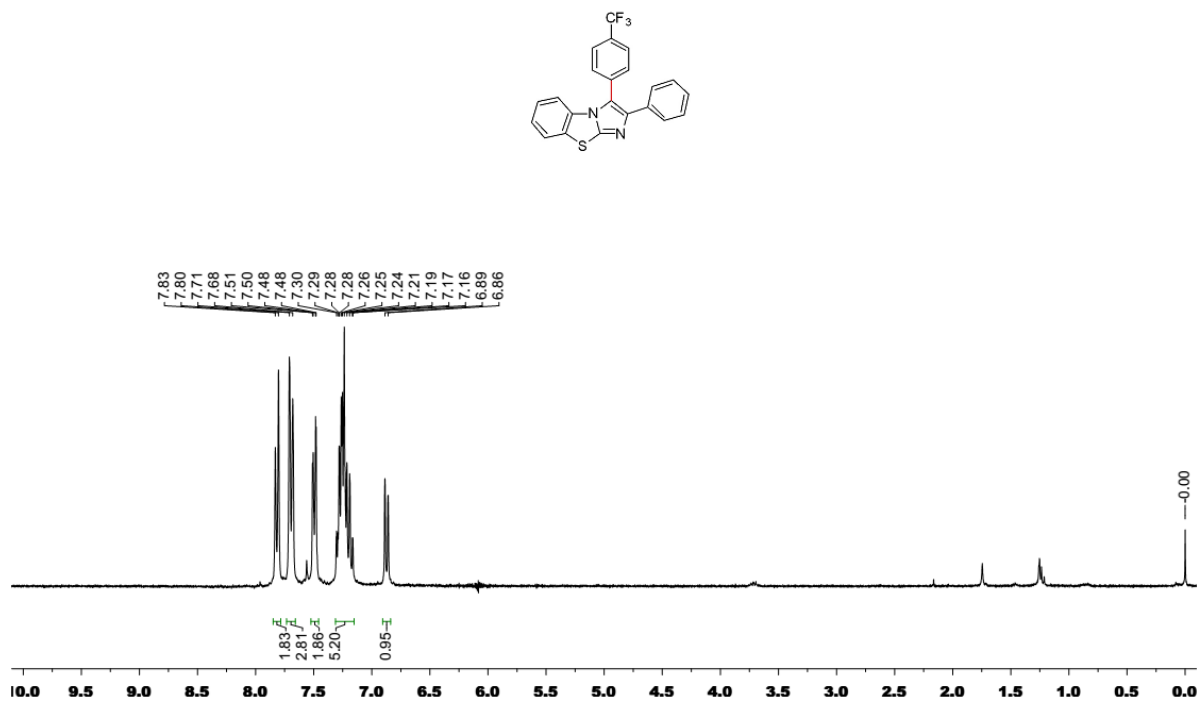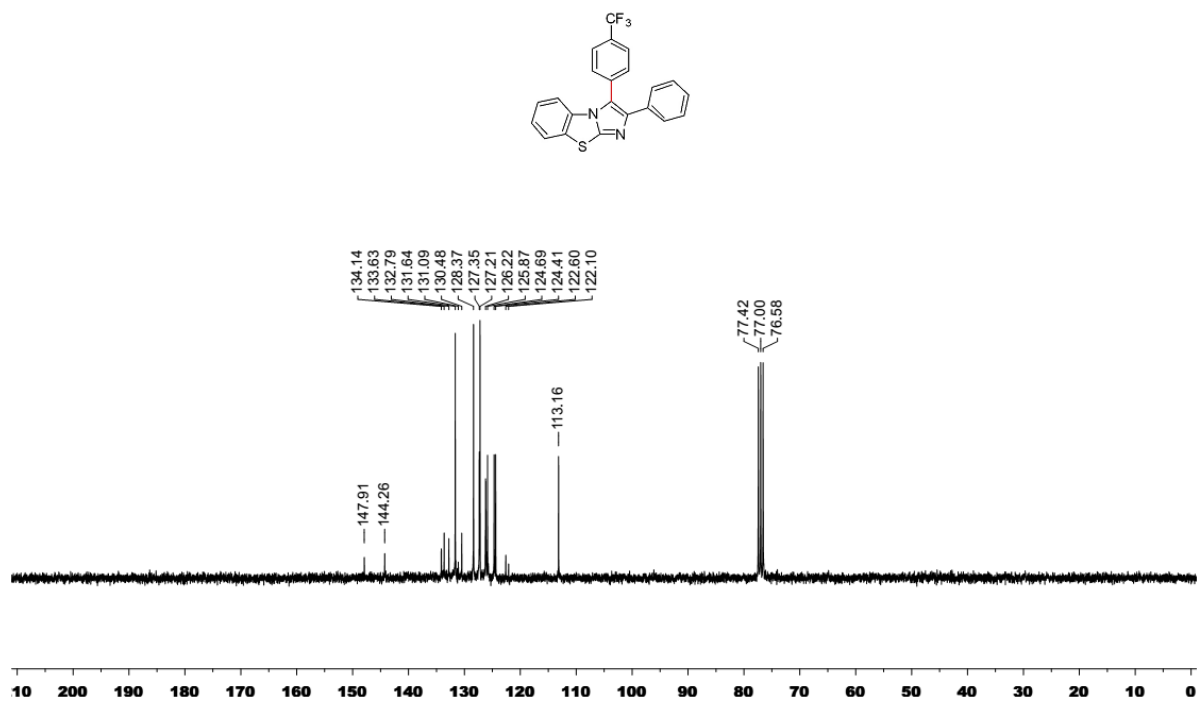

**3-(3,5-Bis(trifluoromethyl)phenyl)-2-phenylbenzo[d]imidazo[2,1-b]thiazole (3be)**

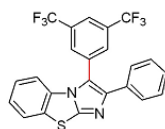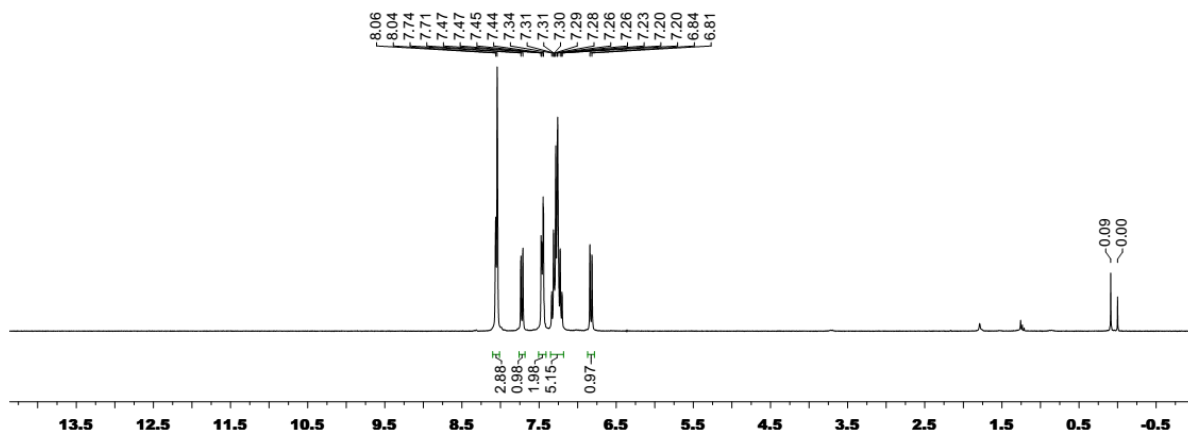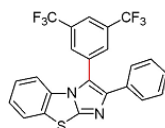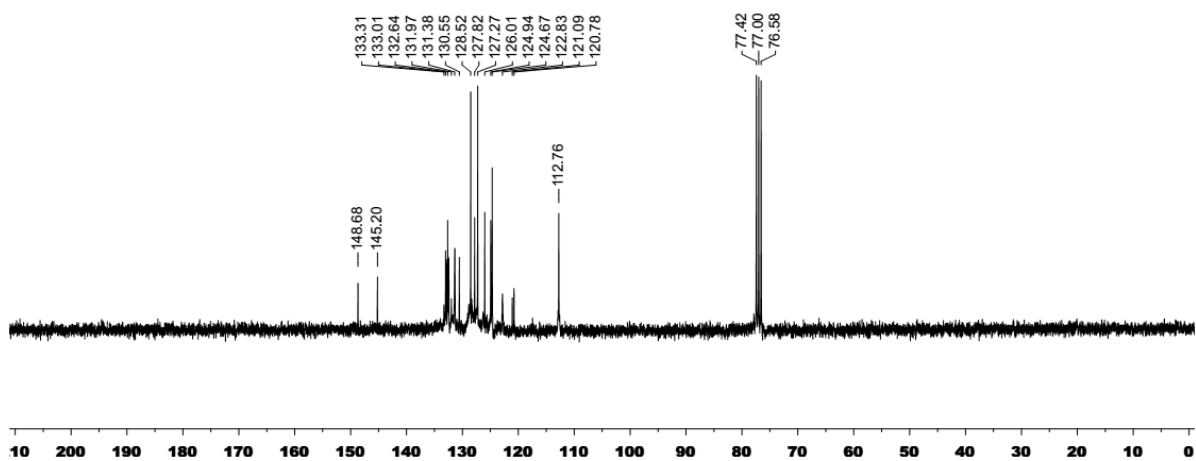

3-(4-Nitro-3-(trifluoromethyl)phenyl)-2-phenylbenzo[d]imidazo[2,1-b]thiazole (3bf)

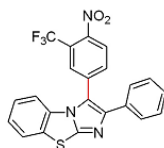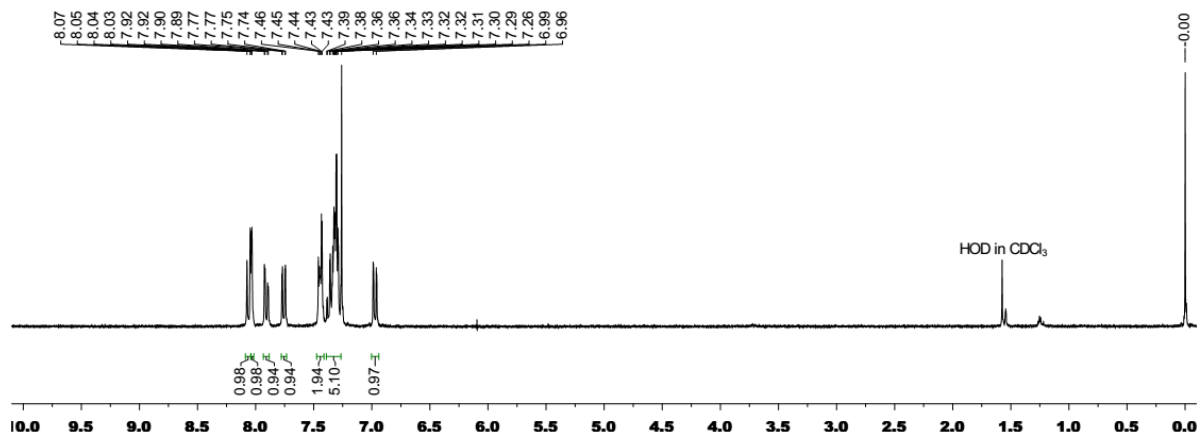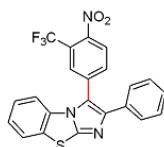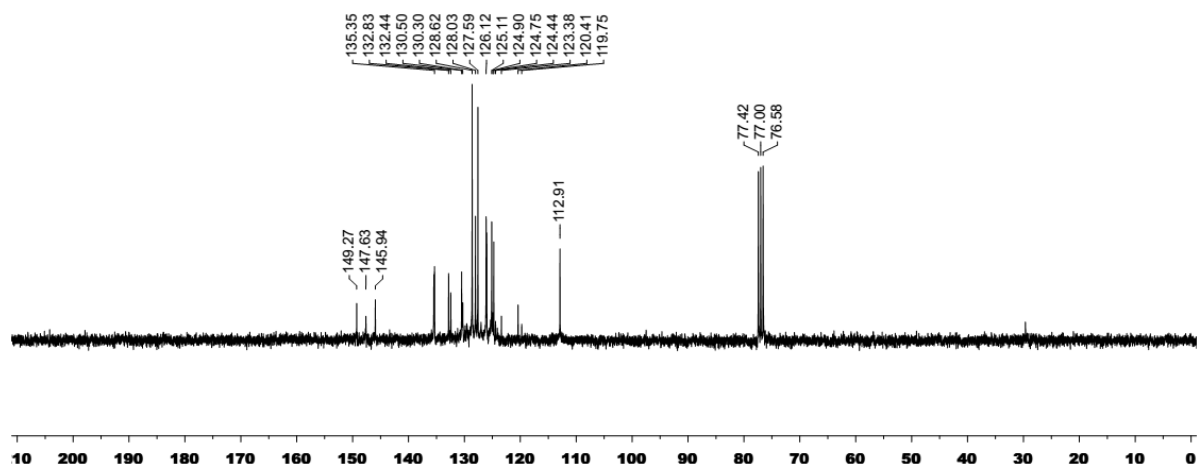

3-(4-Nitrophenyl)-2-phenyl-5,6,7,8-tetrahydrobenzo[d]imidazo[2,1-b]thiazole (3ca)

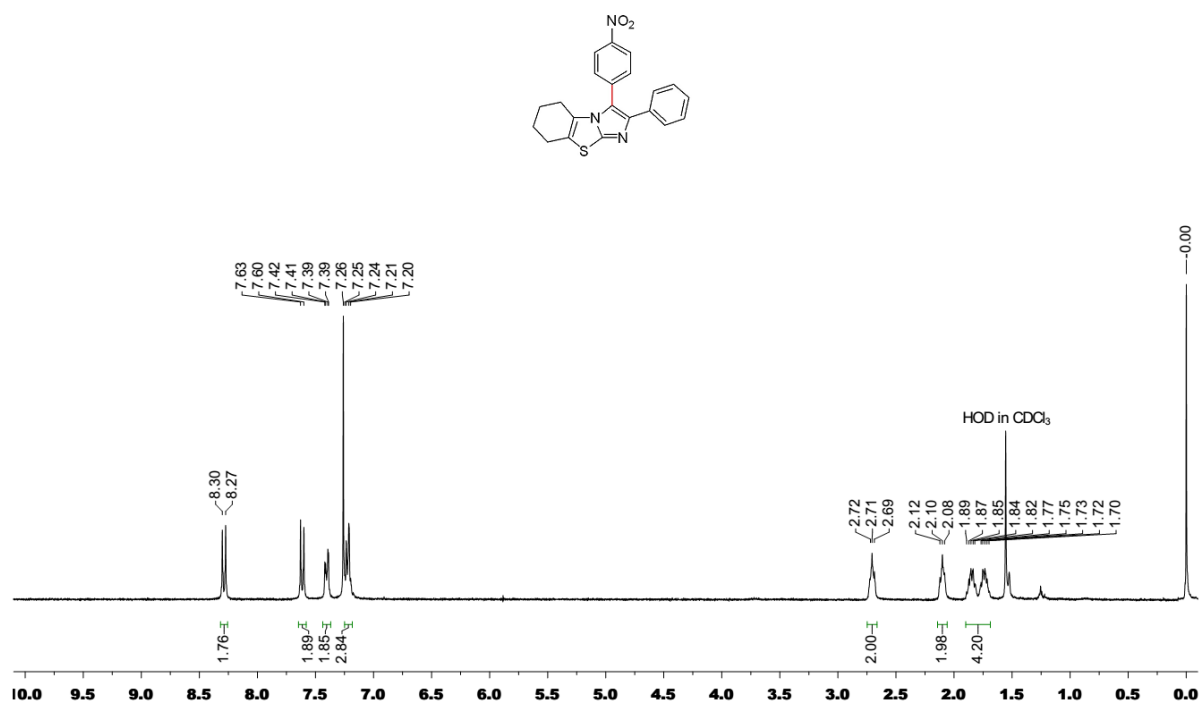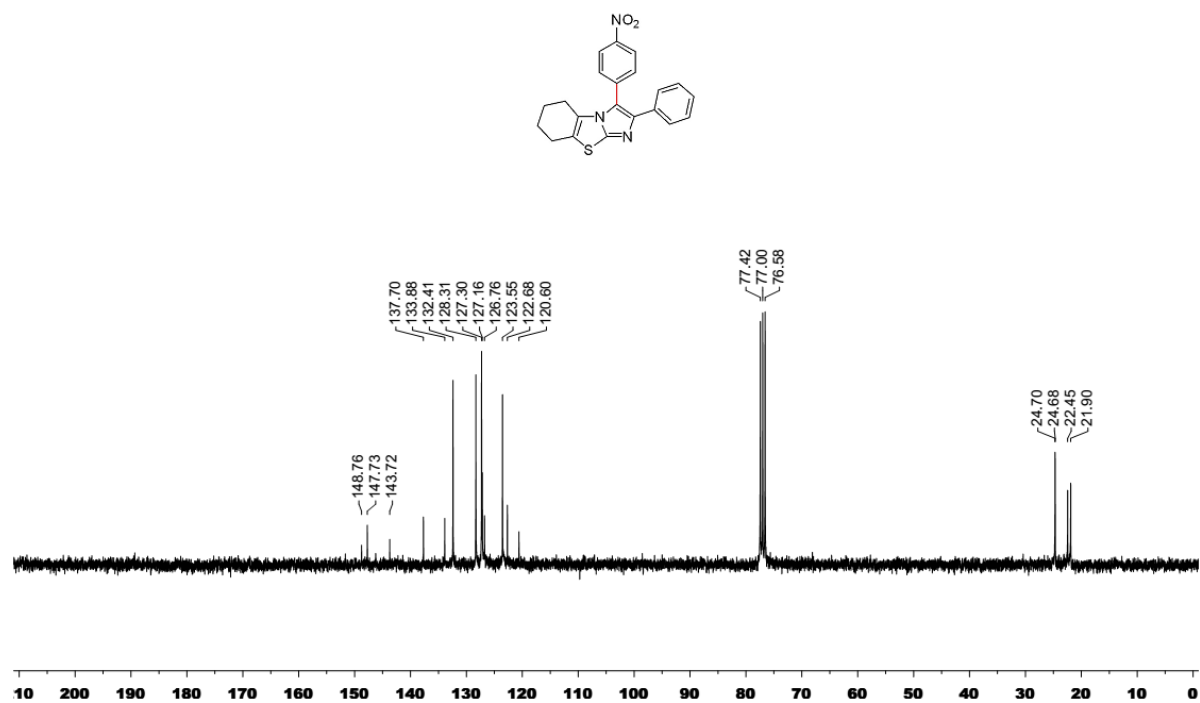

**3-(3-Nitrophenyl)-2-phenyl-5,6,7,8-tetrahydrobenzo[d]imidazo[2,1-b]thiazole (3c)**



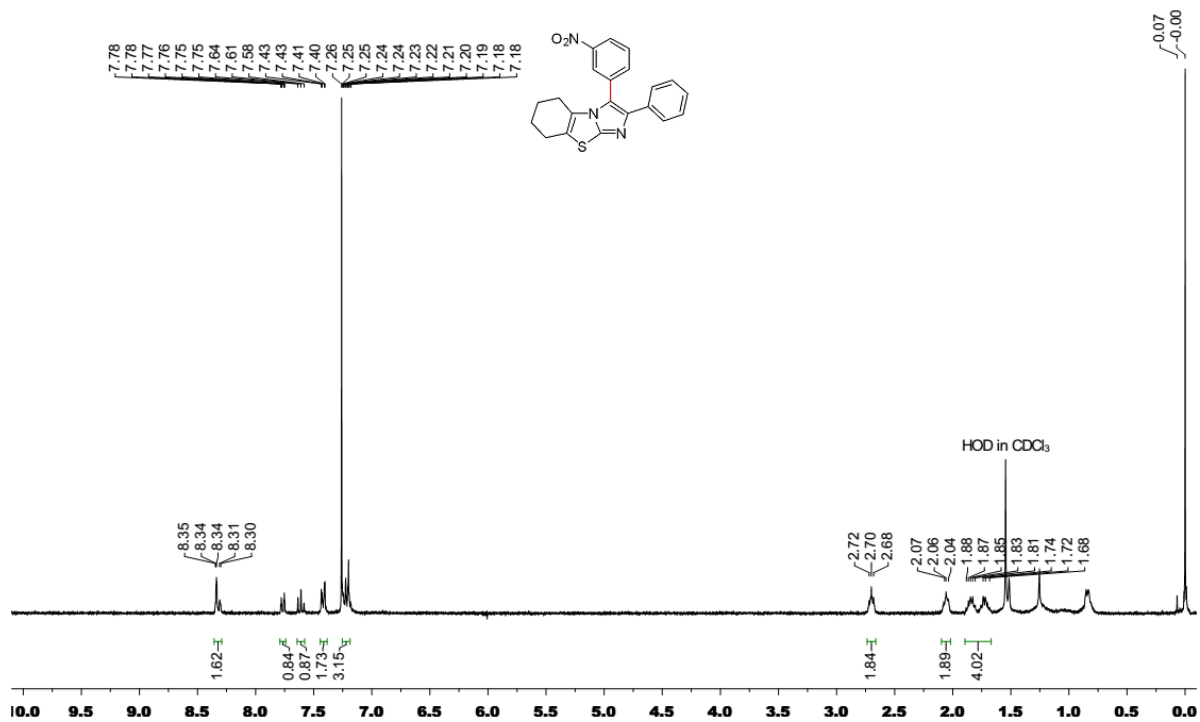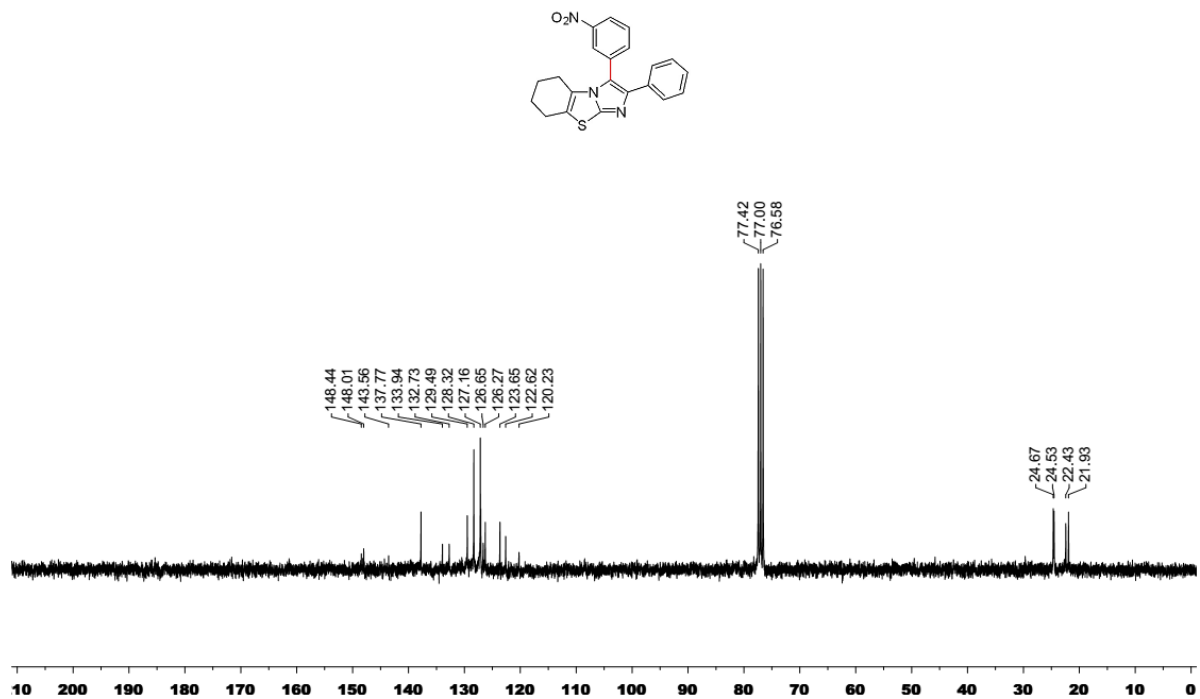

4-(2-Phenyl-5,6,7,8-tetrahydrobenzo[d]imidazo[2,1-b]thiazol-3-yl)benzotrile (3cc)

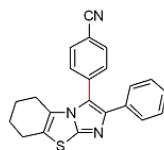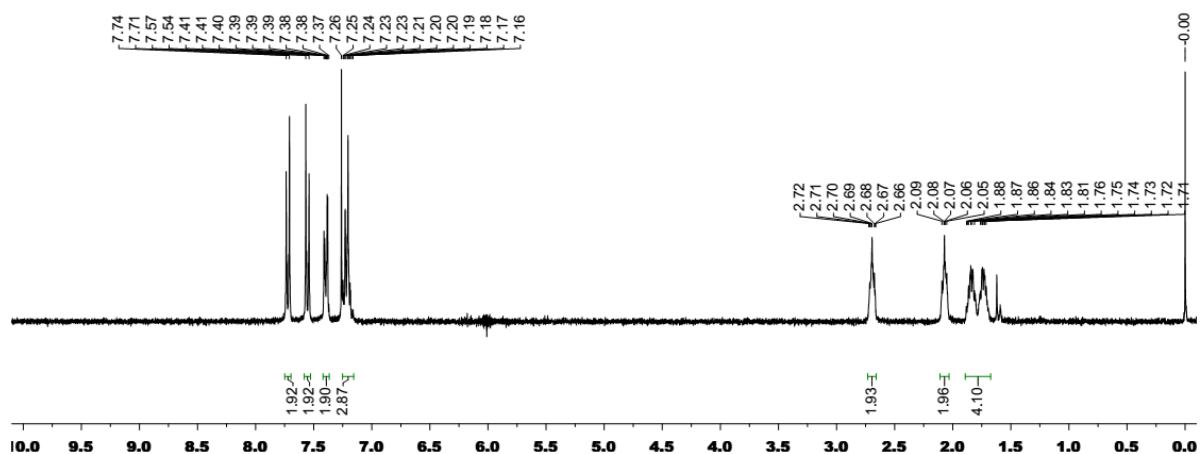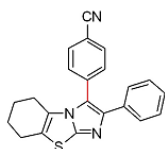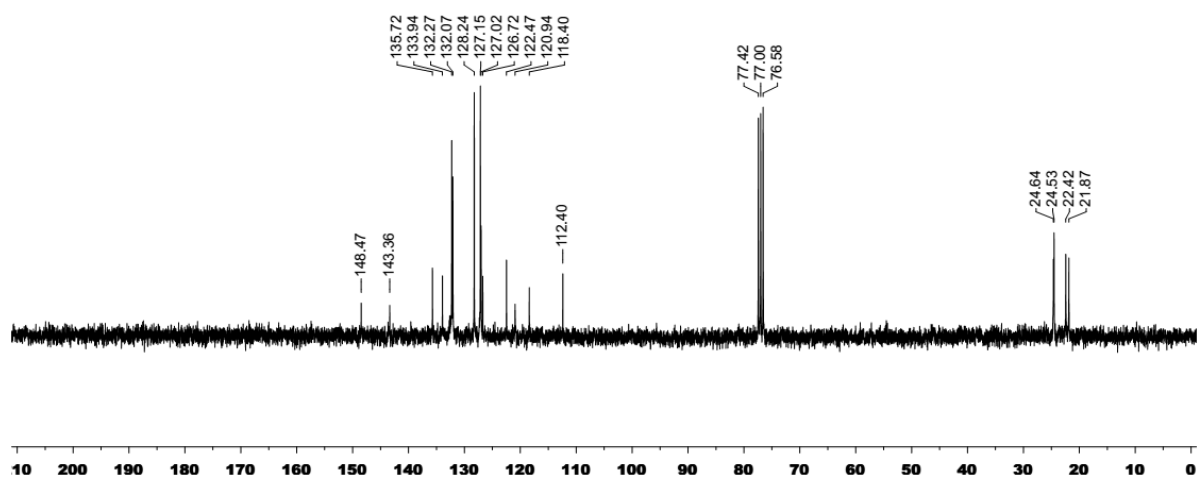

2-Phenyl-3-(4-(trifluoromethyl)phenyl)-5,6,7,8-tetrahydrobenzo[d]imidazo[2,1-b]thiazole (3cd)

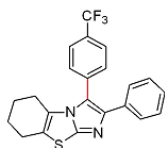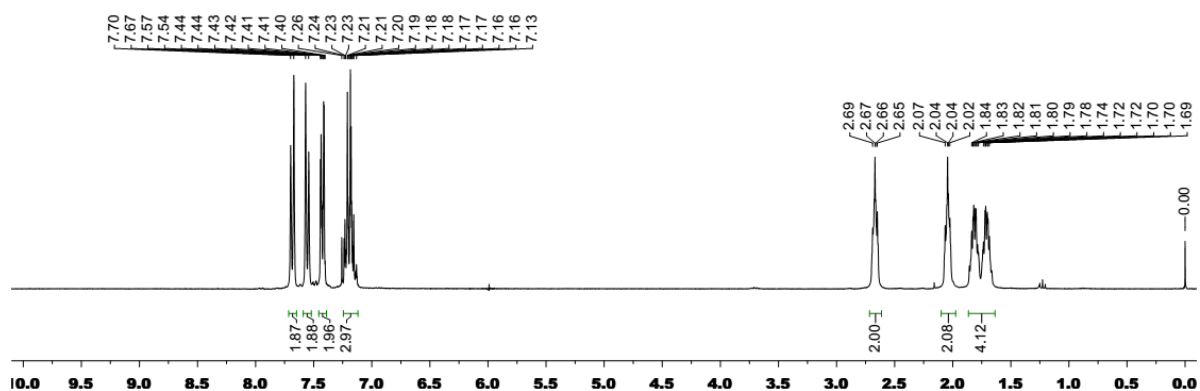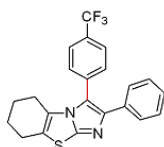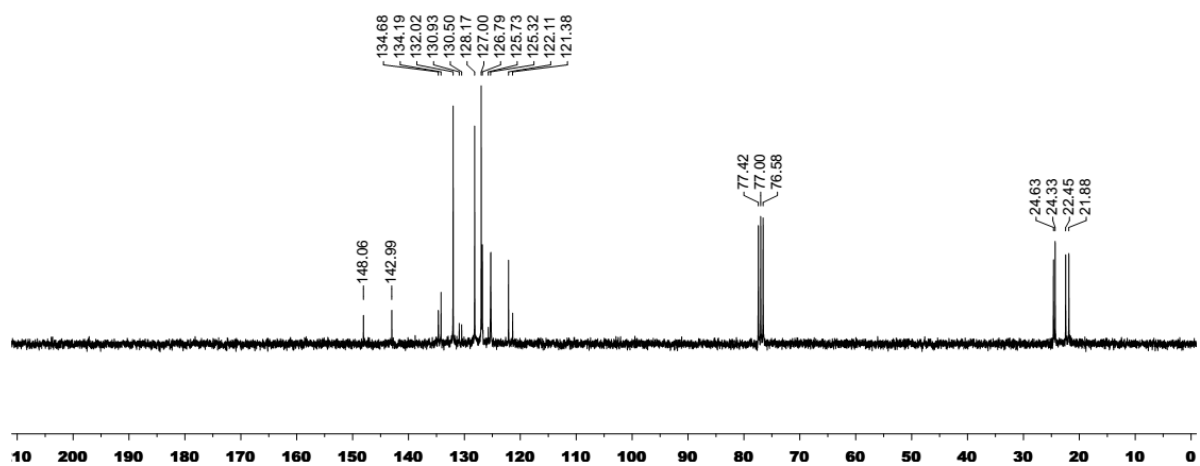

3-(3,5-Bis(trifluoromethyl)phenyl)-2-phenyl-5,6,7,8-tetrahydrobenzo[d]imidazo[2,1-b]thiazole

(3ce)

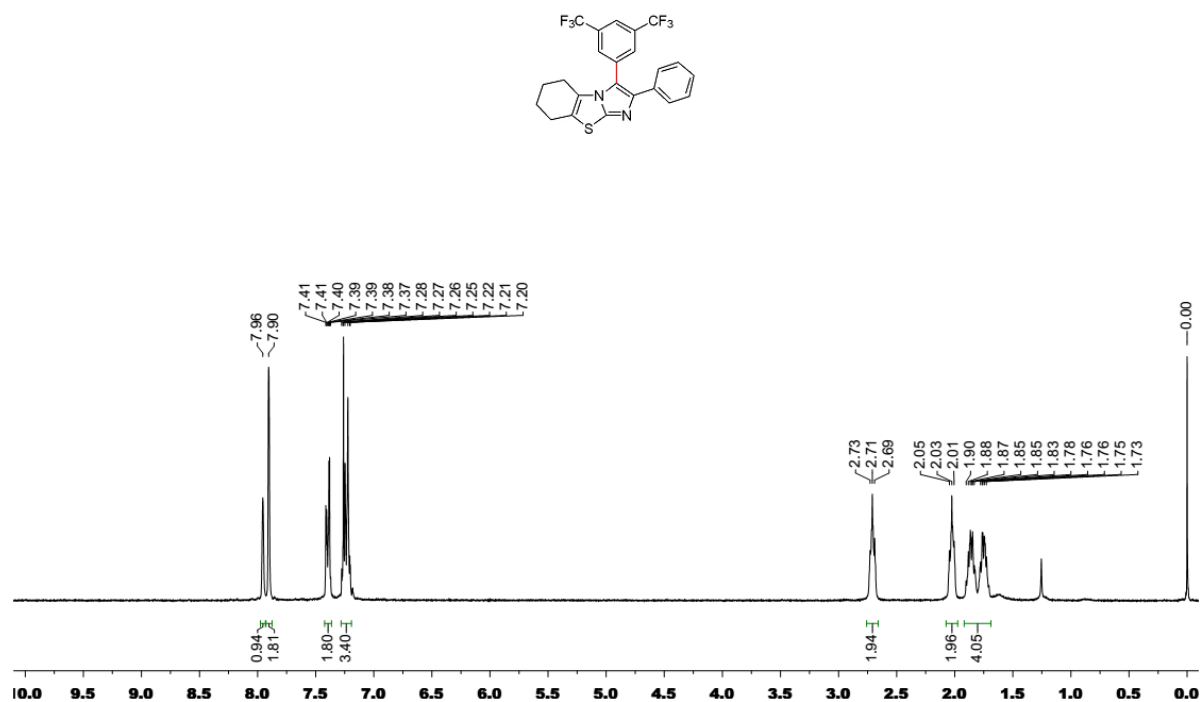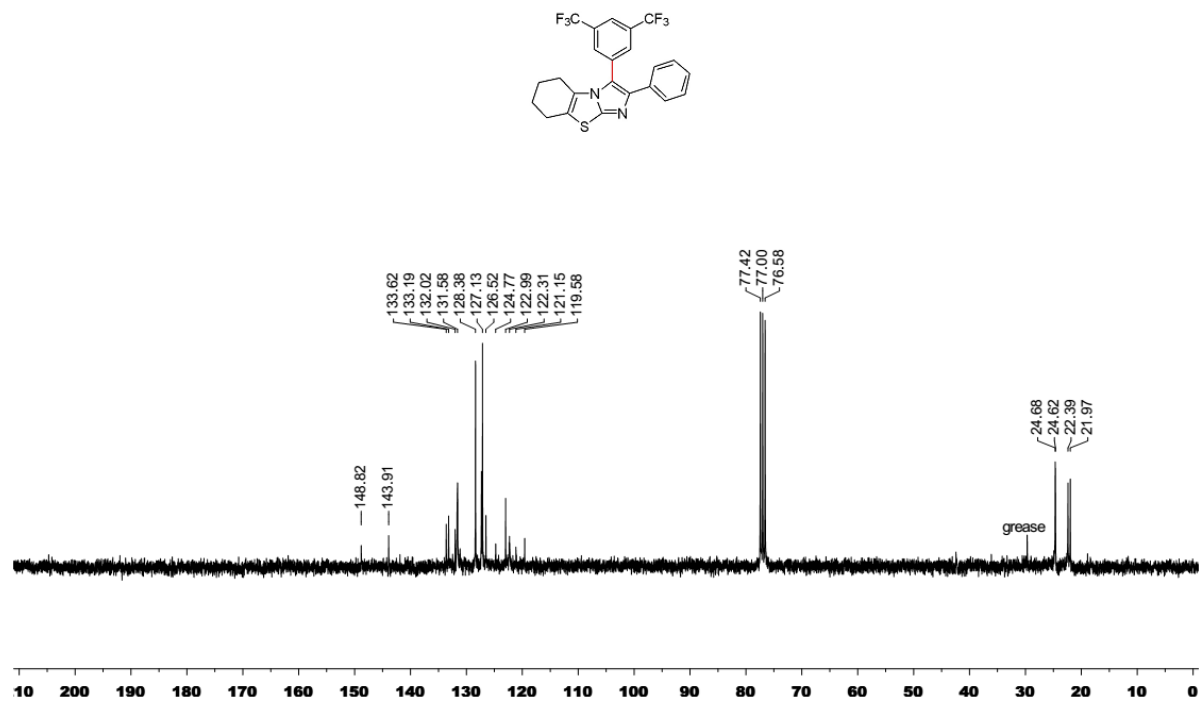

3-(4-Nitro-3-(trifluoromethyl)phenyl)-2-phenyl-5,6,7,8-tetrahydrobenzo[d]imidazo[2,1-

b]thiazol-e (3cf)

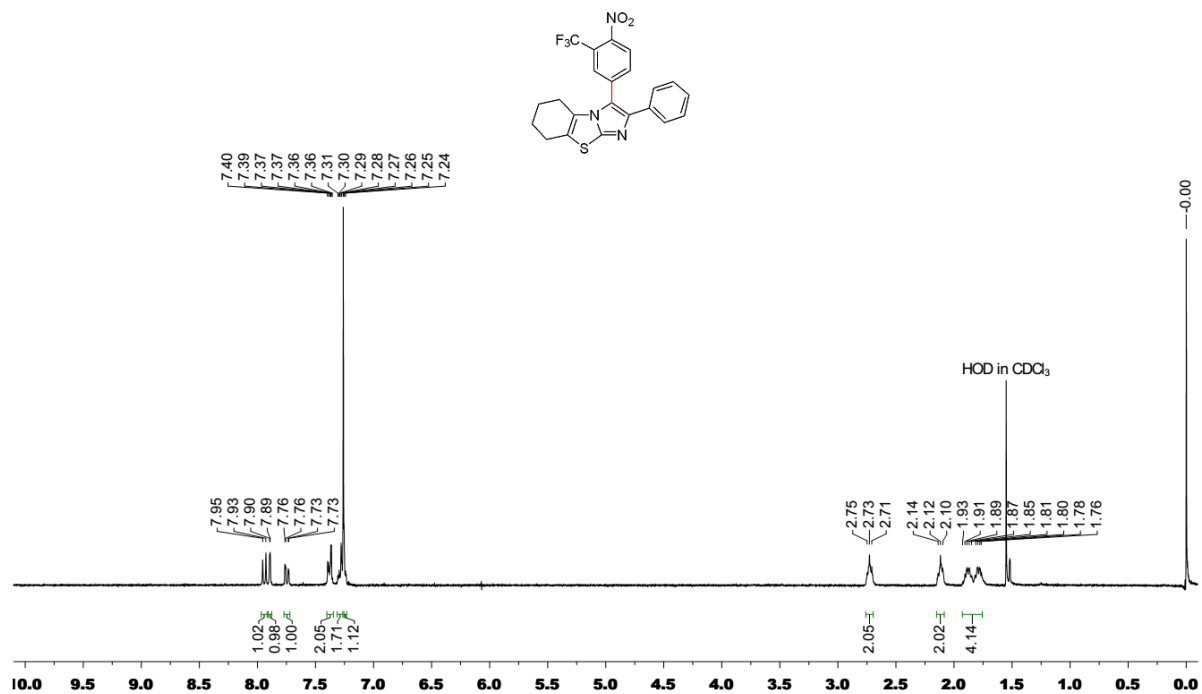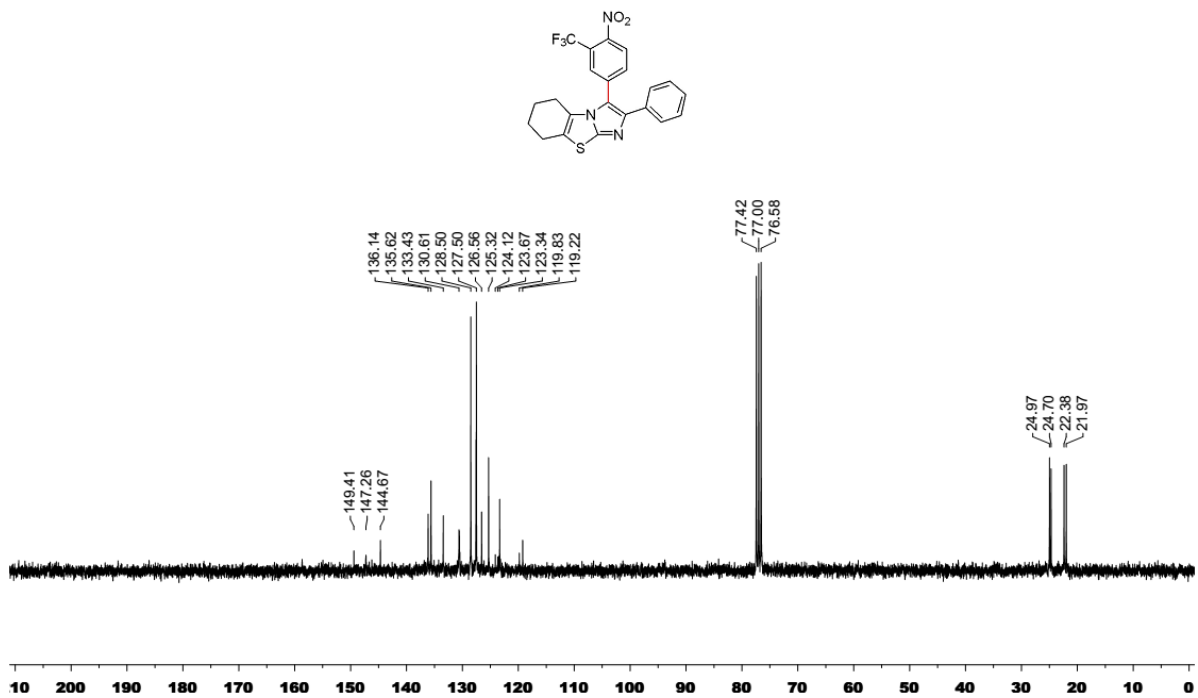

3-Methyl-5-(4-nitrophenyl)-6-phenylimidazo[2,1-b]thiazole (3da)

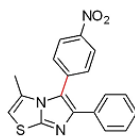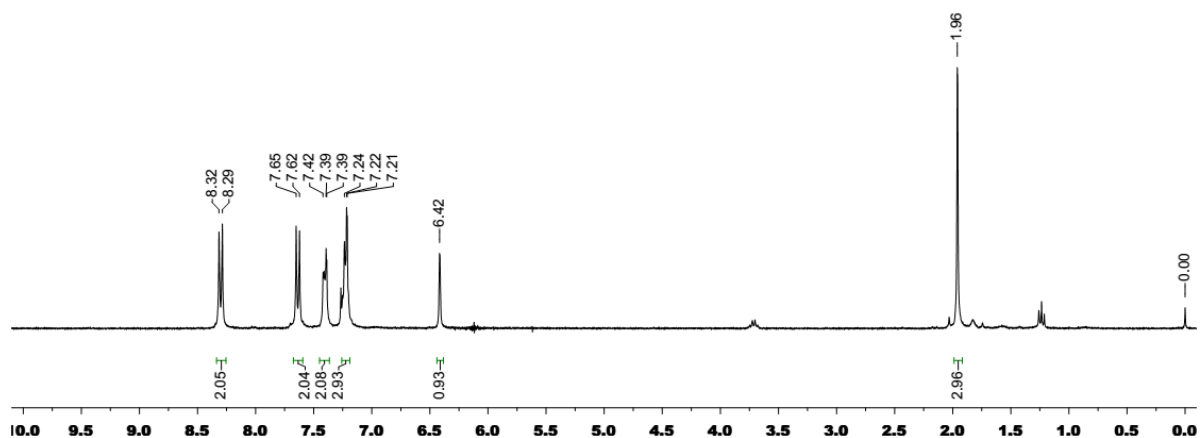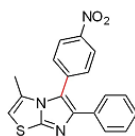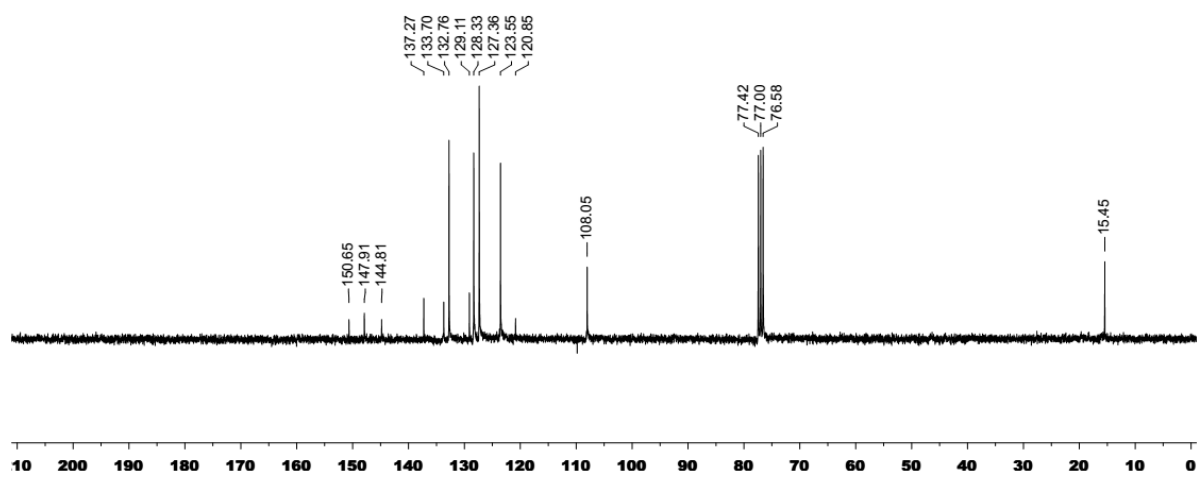

5-(3,5-Bis(trifluoromethyl)phenyl)-3-methyl-6-phenylimidazo[2,1-b]thiazole (3db)

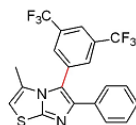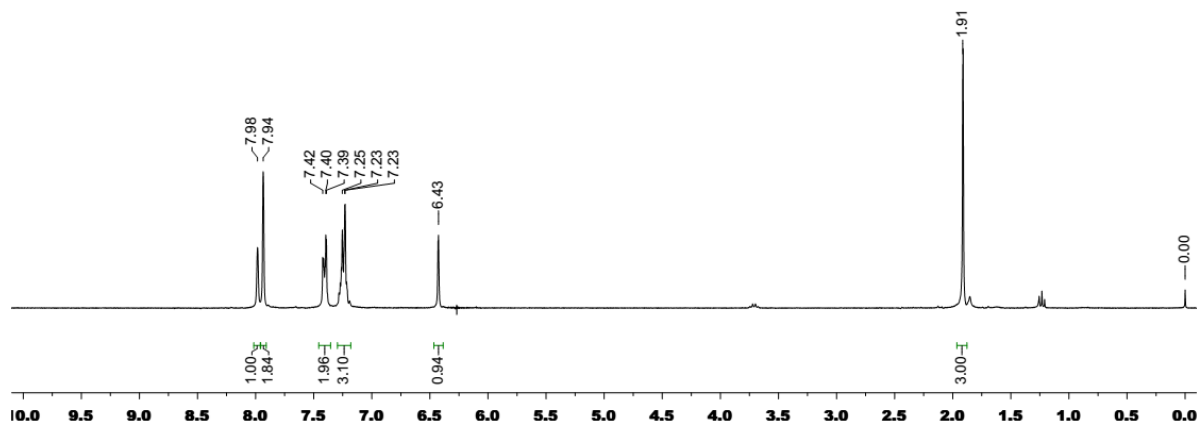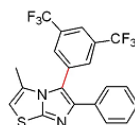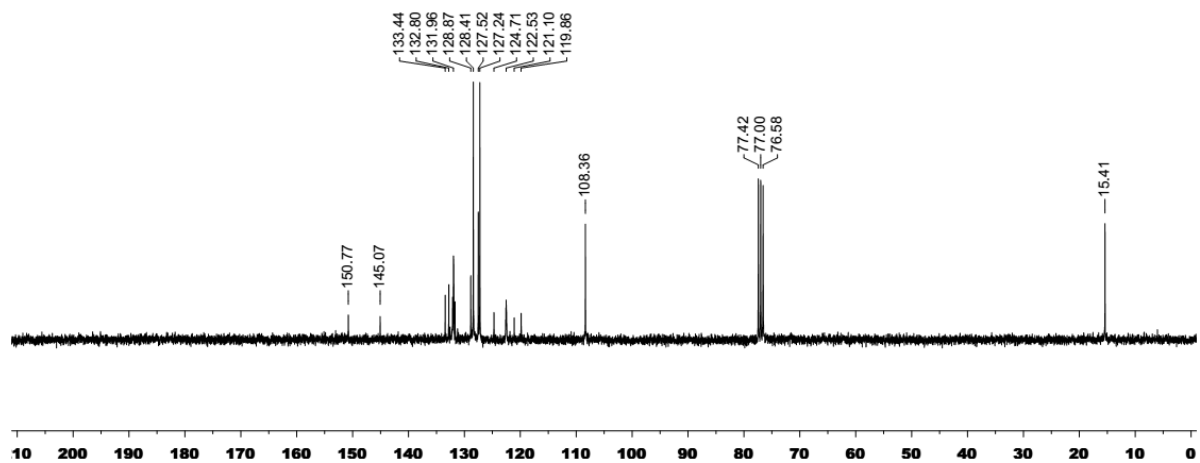

3-Methyl-5-(4-nitro-3-(trifluoromethyl)phenyl)-6-phenylimidazo[2,1-b]thiazole (3dc)

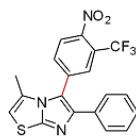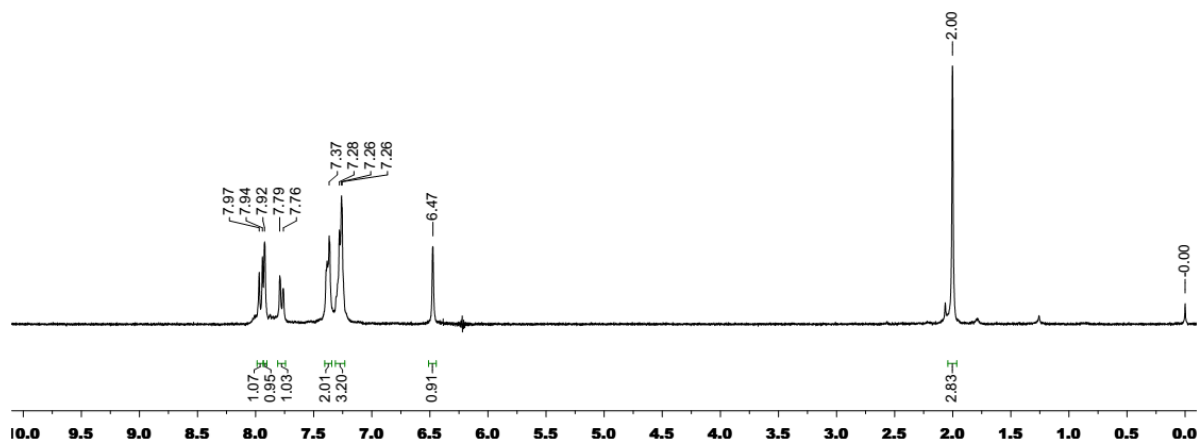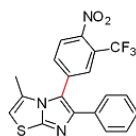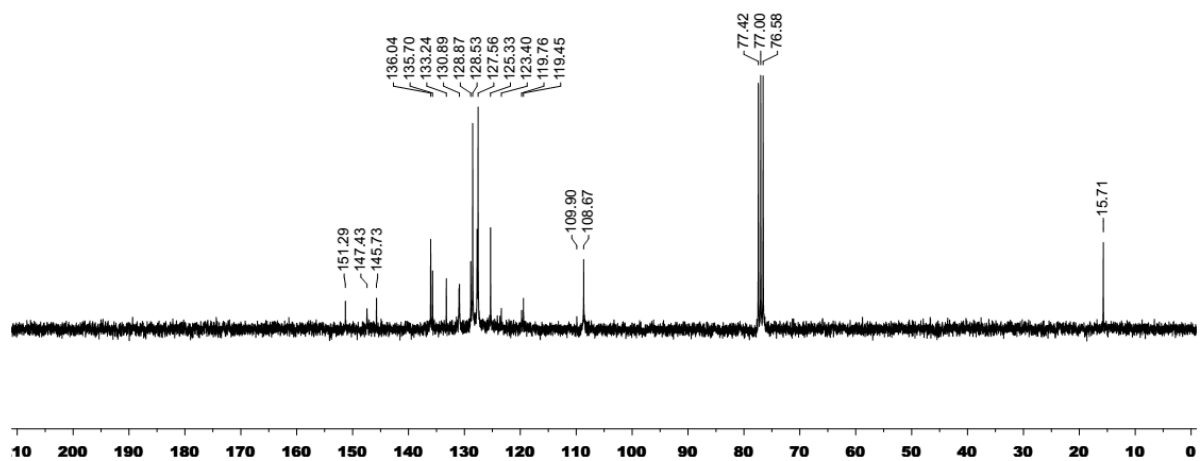

3-Methyl-2,5-bis(3-nitrophenyl)-6-phenylimidazo[2,1-b]thiazole (3dd)



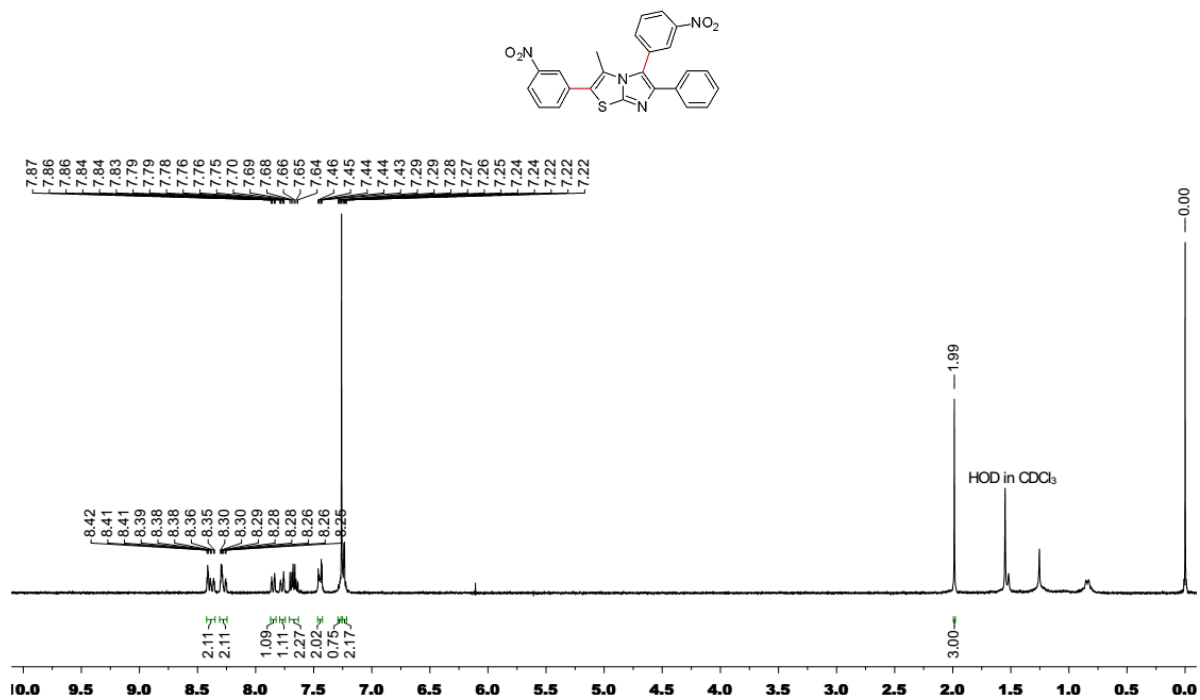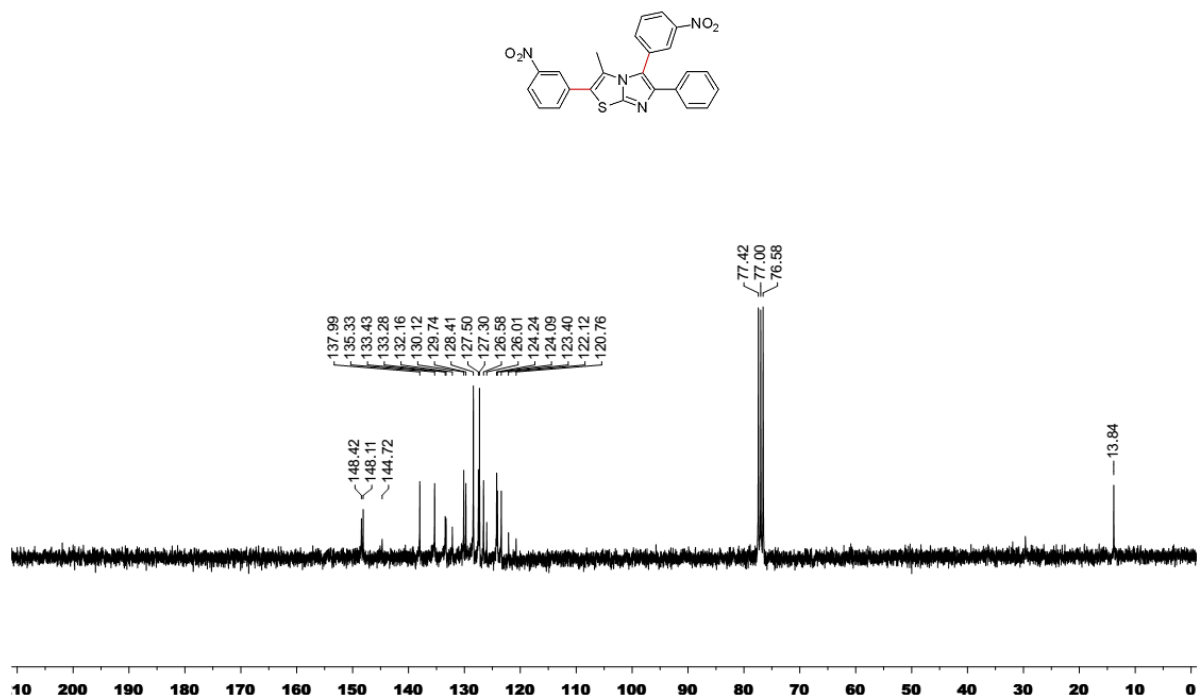

## 5. References

- 1 M. J. Frisch, et al., Gaussian 09, Revision A.01; Gaussian, Inc.: Wallingford CT, 2009.
- 2 A. D. Becke, *J. Chem. Phys.*, 1993, **98**, 5648.
- 3 C. Lee, W. Yang and R. G. Parr, *Phys. Rev. B*, 1988, **37**, 785.
- 4 (a) V. A. Rassolov, M. A. Ratner, J. A. Pople, P. C. Redfern and L. A. Curtiss, *J. Comput. Chem.*, 2001, **22**, 976; (b) V. A. Rassolov, J. A. Pople, M. A. Ratner and T. L. Windus, *J. Chem. Phys.*, 1998, **109**, 1223.
- 5 D. Andrae, U. Häussermann, M. Dolg, H. Stoll and H. Preuss, *Theor. Chim. Acta.* 1990, **77**, 123.
- 6 (a) S. I. Gorelsky, D. Lapointe and K. Fagnou, *J. Org. Chem.*, 2012, **77**, 658; (b) S. I. Gorelsky, D. Lapointe and K. Fagnou, *J. Am. Chem. Soc.*, 2008, **130**, 10848; (c) M. Lafrance, C. N. Rowley, T. K. Woo and K. Fagnou, *J. Am. Chem. Soc.*, 2006, **128**, 8754; (d) M. Lafrance and K. Fagnou, *J. Am. Chem. Soc.*, 2006, **128**, 16496.
- 7 G. D. Meakins, S. R. R. Musk, C. A. Robertson and L. S. Woodhouse, *J. Chem. Soc., Perkin Trans. 1*, 1989, 643.
- 8 S. Ponnala, S. K. Kumar, B. A. Bhat and D. P. Sahu, *Synth. Commun.*, 2005, **35**, 901.
- 9 F. J. Gatewood and S. J. Madison, GB1159691, 1969.
- 10 V. J. Compton, G. D. Meakins and A. J. Raybould, *J. Chem. Soc., Perkin Trans. 1*, 1992, 2029.
